# Supplementary material for: Genomic Analysis of the Basal Lineage Fungus Rhizopus oryzae Reveals a Whole-Genome Duplication
Source: PubMed Central journal article supplement (PMC2699053; doi:10.1371/journal.pgen.1000549), 2009-07-03
Supplement: pgen.1000549.s009.pdf [file pgen.1000549.s009.pdf]

**Table S2 *R. oryzae* assembly mapped to the optical map**

| <b>Linkage group</b> | <b>Map estimated size</b> | <b>Scaffolds</b> | <b>Total scaffold size</b> |
|----------------------|---------------------------|------------------|----------------------------|
| I                    | 6,487,553                 | 18, 1            | 6,412,466                  |
| II                   | 5,153,661                 | 2                | 5,107,438                  |
| III                  | 3,210,534                 | 6                | 3,104,132                  |
| IV                   | 3,314,588                 | 4                | 3,274,895                  |
| V                    | 3,708,002                 | 8, 17            | 3,145,915                  |
| VI                   | 3,747,038                 | 20, 7, 21        | 3,640,464                  |
| VII                  | 3,572,496                 | 3                | 3,411,807                  |
| VIII                 | 3,278,578                 | 5                | 3,273,673                  |
| IX                   | 2,937,735                 | 19, 9            | 2,893,547                  |
| X                    | 2,242,117                 | 16, 13           | 2,109,721                  |
| XI                   | 2,272,156                 | 12, 22           | 1,961,337                  |
| XII                  | 1,898,532                 | 10               | 1,823,771                  |
| XIII                 | 1,742,552                 | 11               | 1,718,195                  |
| XIV                  | 1,689,232                 | 14               | 1,243,565                  |
| XV                   | 1,332,463                 | 15               | 1,232,904                  |
| <b>Total</b>         | <b>46,587,237</b>         |                  | <b>44,353,830</b>          |
