# Supplementary material for: Genomic Analysis of the Basal Lineage Fungus Rhizopus oryzae Reveals a Whole-Genome Duplication
Source: PubMed Central journal article supplement (PMC2699053; doi:10.1371/journal.pgen.1000549), 2009-07-03
Supplement: pgen.1000549.s010.pdf [file pgen.1000549.s010.pdf]

**Table S3. Repeat content in fungal genomes**

| <b>Species</b>               | <b>Repeat (bases)</b> | <b>Assembly size (bases)</b> | <b>% of repeat</b> |
|------------------------------|-----------------------|------------------------------|--------------------|
| <i>Rhizopus oryzae</i>       | 15,739,510            | 45,262,477                   | 34.77%             |
| <i>Neurospora crassa</i>     | 4,297,191             | 39,225,835                   | 10.96%             |
| <i>Magnaporthe grisea</i>    | 3,458,269             | 39,429,053                   | 8.77%              |
| <i>Aspergillus nidulans</i>  | 1,315,289             | 30,069,000                   | 4.37%              |
| <i>Aspergillus fumigatus</i> | 2,744,799             | 29,384,958                   | 9.34%              |
| <i>Fusarium graminearum</i>  | 150,689               | 36,093,143                   | 0.42%              |
| <i>Ustilago maydis</i>       | 618,037               | 19,683,350                   | 3.14%              |
