# Supplementary material for: Genomic Analysis of the Basal Lineage Fungus Rhizopus oryzae Reveals a Whole-Genome Duplication
Source: PubMed Central journal article supplement (PMC2699053; doi:10.1371/journal.pgen.1000549), 2009-07-03
Supplement: pgen.1000549.s011.pdf [file pgen.1000549.s011.pdf]

**Table S4. EST reads corresponding to identified TEs**

| <b>TRANSPOSONS</b> | <b>EST READS</b>                                                         |
|--------------------|--------------------------------------------------------------------------|
| LINE-ESTs          | ROE00005168, ROE00002059, G774P563FF9.T0, G774P541RC7.T1, G774P541FC7.T1 |
| Mariner-ESTs       | ROE00006902, G774P571RF1.T0, G774P571FF1.T0                              |
| LTRs               | ROE00003814, ROE00002163, ROE00002109                                    |
| DIRs               | G774P552RH1.T0                                                           |
