# Supplementary material for: Genomic Analysis of the Basal Lineage Fungus Rhizopus oryzae Reveals a Whole-Genome Duplication
Source: PubMed Central journal article supplement (PMC2699053; doi:10.1371/journal.pgen.1000549), 2009-07-03
Supplement: pgen.1000549.s012.pdf [file pgen.1000549.s012.pdf]

**Table S5 Summary of synteny testing different distance parameters**

| Distance <sup>a</sup> | Duplicated Regions <sup>b</sup> | Expected Triplets <sup>c</sup> | Observed Triplets | Max Genes /Block | Average genes per block | Average size per block (kb) | Genomic coverage (%) |
|-----------------------|---------------------------------|--------------------------------|-------------------|------------------|-------------------------|-----------------------------|----------------------|
| 10,000                | 174                             | 32                             | 0                 | 8                | 3.9                     | 5                           | 10.8                 |
| <b>20,000</b>         | <b>256</b>                      | <b>47</b>                      | <b>3</b>          | <b>9</b>         | <b>4.7</b>              | <b>57</b>                   | <b>12.2</b>          |
| 30,000                | 273                             | 50                             | 10                | 16               | 4.7                     | 57                          | 16.9                 |
| 40,000                | 291                             | 54                             | 20                | 16               | 4.8                     | 64                          | 20.3                 |
| 50,000                | 303                             | 56                             | 26                | 16               | 4.9                     | 81                          | 21.7                 |

<sup>a</sup>The distance between two neighboring homologous gene pairs that share the same order and orientation in two genomic locations;

<sup>b</sup>The genomic regions that contain at least three homologous gene pairs with another genomic region;

<sup>c</sup>The expected triplets according to a Poisson distribution.
