# Supplementary material for: Genomic Analysis of the Basal Lineage Fungus Rhizopus oryzae Reveals a Whole-Genome Duplication
Source: PubMed Central journal article supplement (PMC2699053; doi:10.1371/journal.pgen.1000549), 2009-07-03
Supplement: pgen.1000549.s013.pdf [file pgen.1000549.s013.pdf]

**Table S6 R. oryzae syntenic regions and gene pairs that define each region\***

|              |             |         |         |         |         |              |              |              |      |       |       |
|--------------|-------------|---------|---------|---------|---------|--------------|--------------|--------------|------|-------|-------|
| ##Scaffold_1 | Scaffold_1  | 5139455 | 5173290 | 1       | 2074640 | 2099070      | -1           | 3            |      |       |       |
|              | 5146698     | 5147430 | 2074640 | 1       | -1      | RO3G_01993.1 | RO3G_00815.1 | 251          | 227  | 54.19 |       |
|              | 5139455     | 5140868 | 2084667 | 2085932 | 1       | -1           | RO3G_01991.1 | RO3G_00819.1 | 665  | 381   | 78.48 |
|              | 5172250     | 5173290 | 2097882 | 2099070 | -1      | 1            | RO3G_02005.1 | RO3G_00826.1 | 313  | 207   | 74.4  |
| ##Scaffold_1 | Scaffold_19 | 1327841 | 1352787 | 19      | 239215  | 256226       | -1           | 3            |      |       |       |
|              | 1349741     | 1352787 | 239215  | 242170  | 1       | -1           | RO3G_00534.1 | RO3G_16214.1 | 1506 | 938   | 79.42 |
|              | 1347735     | 1349468 | 245057  | 246785  | 1       | -1           | RO3G_00533.1 | RO3G_16215.1 | 876  | 458   | 97.6  |
|              | 1327841     | 1328549 | 255346  | 256226  | 1       | -1           | RO3G_00525.1 | RO3G_16220.1 | 296  | 186   | 80.11 |
| ##Scaffold_1 | Scaffold_19 | 2462451 | 2479793 | 19      | 154590  | 169639       | -1           | 4            |      |       |       |
|              | 2479301     | 2479793 | 154590  | 155123  | -1      | 1            | RO3G_00980.1 | RO3G_16178.1 | 133  | 165   | 63.64 |
|              | 2477159     | 2479279 | 155903  | 156742  | 1       | -1           | RO3G_00979.1 | RO3G_16179.1 | 297  | 210   | 72.38 |
|              | 2475188     | 2476387 | 157429  | 160018  | 1       | -1           | RO3G_00978.1 | RO3G_16180.1 | 332  | 375   | 58.4  |
|              | 2462451     | 2464245 | 167813  | 169639  | -1      | 1            | RO3G_00974.1 | RO3G_16183.1 | 739  | 572   | 73.95 |
| ##Scaffold_1 | Scaffold_19 | 2553337 | 2590631 | 19      | 180637  | 192629       | -1           | 3            |      |       |       |
|              | 2589972     | 2590631 | 180637  | 181650  | -1      | 1            | RO3G_01024.1 | RO3G_16188.1 | 157  | 173   | 66.47 |
|              | 2587587     | 2588491 | 182690  | 183434  | 1       | -1           | RO3G_01022.1 | RO3G_16189.1 | 139  | 210   | 47.62 |
|              | 2553337     | 2558893 | 187928  | 192629  | -1      | 1            | RO3G_01012.1 | RO3G_16191.1 | 1066 | 1496  | 44.25 |
| ##Scaffold_1 | Scaffold_19 | 3468924 | 3508159 | 19      | 104727  | 133238       | -1           | 4            |      |       |       |
|              | 3507656     | 3508159 | 104727  | 105591  | 1       | -1           | RO3G_01342.1 | RO3G_16167.1 | 290  | 167   | 85.03 |
|              | 3487398     | 3489073 | 115207  | 116988  | -1      | 1            | RO3G_01334.1 | RO3G_16170.1 | 665  | 373   | 82.84 |
|              | 3482785     | 3484068 | 117402  | 129254  | 1       | -1           | RO3G_01332.1 | RO3G_16171.1 | 796  | 427   | 98.59 |
|              | 3468924     | 3470087 | 132259  | 133238  | -1      | 1            | RO3G_01331.1 | RO3G_16172.1 | 317  | 291   | 59.11 |
| ##Scaffold_1 | Scaffold_27 | 5632797 | 5642580 | 27      | 49535   | 57203        | -1           | 3            |      |       |       |
|              | 5641498     | 5642580 | 49535   | 50416   | -1      | 1            | RO3G_02194.1 | RO3G_17174.1 | 384  | 197   | 98.98 |
|              | 5640603     | 5641416 | 50723   | 51617   | -1      | 1            | RO3G_02193.1 | RO3G_17175.1 | 266  | 180   | 70.56 |
|              | 5632797     | 5633430 | 56831   | 57203   | -1      | 1            | RO3G_02190.1 | RO3G_17179.1 | 114  | 65    | 86.15 |
| ##Scaffold_1 | Scaffold_3  | 1654328 | 1697462 | 3       | 3028752 | 3069039      | -1           | 7            |      |       |       |
|              | 1697065     | 1697462 | 3028752 | 3029256 | 1       | -1           | RO3G_00673.1 | RO3G_05370.1 | 158  | 88    | 90.91 |
|              | 1692207     | 1693682 | 3038913 | 3039469 | -1      | 1            | RO3G_00670.1 | RO3G_05373.1 | 171  | 95    | 81.05 |
|              | 1685798     | 1686784 | 3040122 | 3041439 | 1       | -1           | RO3G_00668.1 | RO3G_05374.1 | 498  | 328   | 80.18 |
|              | 1681663     | 1682304 | 3042781 | 3043734 | -1      | 1            | RO3G_00666.1 | RO3G_05375.1 | 301  | 217   | 76.5  |
|              | 1678789     | 1679370 | 3046924 | 3047825 | -1      | 1            | RO3G_00665.1 | RO3G_05377.1 | 244  | 176   | 80.11 |
|              | 1674847     | 1675966 | 3051868 | 3052787 | -1      | 1            | RO3G_00664.1 | RO3G_05379.1 | 226  | 192   | 70.83 |
|              | 1654328     | 1655871 | 3067883 | 3069039 | -1      | 1            | RO3G_00656.1 | RO3G_05385.1 | 308  | 249   | 64.66 |
| ##Scaffold_1 | Scaffold_3  | 1834274 | 1857190 | 3       | 3316695 | 3333906      | 1            | 6            |      |       |       |
|              | 1834274     | 1835377 | 3316695 | 3317390 | -1      | -1           | RO3G_00729.1 | RO3G_05476.1 | 251  | 365   | 43.84 |
|              | 1838611     | 1839346 | 3318802 | 3319503 | 1       | 1            | RO3G_00731.1 | RO3G_05477.1 | 283  | 149   | 95.3  |
|              | 1839413     | 1840165 | 3319846 | 3320141 | -1      | -1           | RO3G_00732.1 | RO3G_05478.1 | 117  | 84    | 64.29 |
|              | 1849249     | 1849545 | 3324668 | 3324967 | 1       | 1            | RO3G_00735.1 | RO3G_05480.1 | 161  | 97    | 81.44 |
|              | 1849981     | 1851664 | 3325339 | 3326298 | -1      | -1           | RO3G_00736.1 | RO3G_05481.1 | 449  | 291   | 84.19 |
|              | 1855837     | 1857190 | 3332302 | 3333906 | 1       | 1            | RO3G_00739.1 | RO3G_05484.1 | 646  | 340   | 97.06 |
| ##Scaffold_1 | Scaffold_3  | 2232959 | 2241323 | 3       | 2823434 | 2832525      | -1           | 3            |      |       |       |
|              | 2240573     | 2241323 | 2823434 | 2824187 | 1       | -1           | RO3G_00883.1 | RO3G_05289.1 | 324  | 179   | 88.83 |
|              | 2236971     | 2238474 | 2825378 | 2826729 | 1       | -1           | RO3G_00881.1 | RO3G_05291.1 | 733  | 403   | 87.1  |
|              | 2232959     | 2234484 | 2831007 | 2832525 | 1       | -1           | RO3G_00880.1 | RO3G_05293.1 | 825  | 489   | 86.71 |
| ##Scaffold_1 | Scaffold_3  | 2274523 | 2279729 | 3       | 2154560 | 2160229      | -1           | 3            |      |       |       |
|              | 2279002     | 2279729 | 2154560 | 2155278 | -1      | 1            | RO3G_00897.1 | RO3G_05028.1 | 232  | 199   | 66.33 |
|              | 2277619     | 2278794 | 2155500 | 2156770 | 1       | -1           | RO3G_00896.1 | RO3G_05029.1 | 379  | 360   | 63.61 |
|              | 2274523     | 2277180 | 2159090 | 2160229 | -1      | 1            | RO3G_00895.1 | RO3G_05030.1 | 613  | 374   | 80.48 |
| ##Scaffold_1 | Scaffold_3  | 2290435 | 2301669 | 3       | 2693474 | 2709438      | 1            | 3            |      |       |       |
|              | 2290435     | 2291150 | 2693474 | 2694712 | 1       | 1            | RO3G_00900.1 | RO3G_05242.1 | 322  | 197   | 83.25 |
|              | 2293685     | 2295456 | 2697565 | 2699340 | 1       | 1            | RO3G_00902.1 | RO3G_05244.1 | 867  | 496   | 89.31 |
|              | 2301025     | 2301669 | 2708632 | 2709438 | -1      | -1           | RO3G_00905.1 | RO3G_05250.1 | 311  | 206   | 70.39 |
| ##Scaffold_1 | Scaffold_3  | 4322746 | 4339475 | 3       | 1739965 | 1759639      | 1            | 4            |      |       |       |
|              | 4322746     | 4325046 | 1739965 | 1741648 | 1       | 1            | RO3G_01670.1 | RO3G_04858.1 | 689  | 427   | 78.22 |
|              | 4328025     | 4329658 | 1752045 | 1753673 | -1      | -1           | RO3G_01672.1 | RO3G_04863.1 | 954  | 485   | 99.18 |
|              | 4335837     | 4337834 | 1755449 | 1757983 | 1       | 1            | RO3G_01675.1 | RO3G_04864.1 | 858  | 465   | 90.32 |
|              | 4339019     | 4339475 | 1758159 | 1759639 | -1      | -1           | RO3G_01677.1 | RO3G_04865.1 | 229  | 133   | 83.46 |
| ##Scaffold_1 | Scaffold_3  | 4344355 | 4363763 | 3       | 2063883 | 2096295      | -1           | 4            |      |       |       |
|              | 4362564     | 4363763 | 2063883 | 2065638 | 1       | -1           | RO3G_01686.1 | RO3G_04991.1 | 457  | 325   | 73.23 |
|              | 4358023     | 4358445 | 2076248 | 2076673 | 1       | -1           | RO3G_01685.1 | RO3G_04997.1 | 150  | 139   | 79.14 |
|              | 4348205     | 4350856 | 2081332 | 2085311 | -1      | 1            | RO3G_01681.1 | RO3G_04999.1 | 1070 | 816   | 70.47 |
|              | 4344355     | 4344792 | 2095197 | 2096295 | -1      | 1            | RO3G_01679.1 | RO3G_05005.1 | 211  | 132   | 81.06 |

|              |            |         |         |    |         |              |              |      |      |       |  |  |
|--------------|------------|---------|---------|----|---------|--------------|--------------|------|------|-------|--|--|
| ##Scaffold_1 | Scaffold_3 | 4373012 | 4384804 | 3  | 2029046 | 2051071      | -1           | 3    |      |       |  |  |
| 4383902      | 4384804    | 2029046 | 2029743 | -1 | 1       | RO3G_01694.1 | RO3G_04976.1 | 216  | 185  | 61.08 |  |  |
| 4377771      | 4380355    | 2041508 | 2044323 | -1 | 1       | RO3G_01693.1 | RO3G_04980.1 | 1079 | 752  | 80.72 |  |  |
| 4373012      | 4374778    | 2049740 | 2051071 | -1 | 1       | RO3G_01691.1 | RO3G_04984.1 | 241  | 264  | 48.48 |  |  |
| ##Scaffold_1 | Scaffold_4 | 62010   | 84064   | 4  | 1497289 | 1516902      | 1            | 4    |      |       |  |  |
| 62010        | 63496      | 1497289 | 1498647 | -1 | -1      | RO3G_00024.1 | RO3G_06049.1 | 637  | 338  | 93.2  |  |  |
| 63914        | 65025      | 1498815 | 1501111 | -1 | -1      | RO3G_00025.1 | RO3G_06050.1 | 560  | 348  | 82.47 |  |  |
| 78434        | 79817      | 1510755 | 1512183 | 1  | 1       | RO3G_00031.1 | RO3G_06055.1 | 542  | 439  | 59    |  |  |
| 83378        | 84064      | 1515966 | 1516902 | 1  | 1       | RO3G_00034.1 | RO3G_06056.1 | 182  | 145  | 62.76 |  |  |
| ##Scaffold_1 | Scaffold_4 | 99170   | 105388  | 4  | 1535524 | 1540887      | -1           | 3    |      |       |  |  |
| 104076       | 105388     | 1535524 | 1538325 | 1  | -1      | RO3G_00045.1 | RO3G_06063.1 | 411  | 375  | 58.13 |  |  |
| 100036       | 100341     | 1539669 | 1539997 | -1 | 1       | RO3G_00043.1 | RO3G_06064.1 | 108  | 106  | 55.66 |  |  |
| 99170        | 99753      | 1540296 | 1540887 | 1  | -1      | RO3G_00042.1 | RO3G_06065.1 | 261  | 161  | 91.93 |  |  |
| ##Scaffold_1 | Scaffold_4 | 1070409 | 1088933 | 4  | 1833814 | 1854876      | 1            | 4    |      |       |  |  |
| 1070409      | 1070876    | 1833814 | 1834281 | 1  | 1       | RO3G_00430.1 | RO3G_06177.1 | 246  | 155  | 96.77 |  |  |
| 1081320      | 1082875    | 1847158 | 1848769 | 1  | 1       | RO3G_00434.1 | RO3G_06181.1 | 748  | 472  | 77.33 |  |  |
| 1083195      | 1083873    | 1849807 | 1850490 | 1  | 1       | RO3G_00435.1 | RO3G_06182.1 | 189  | 187  | 68.45 |  |  |
| 1087478      | 1088933    | 1853380 | 1854876 | -1 | -1      | RO3G_00437.1 | RO3G_06184.1 | 516  | 348  | 70.69 |  |  |
| ##Scaffold_1 | Scaffold_4 | 1168571 | 1176522 | 4  | 2138900 | 2151664      | 1            | 3    |      |       |  |  |
| 1168571      | 1169602    | 2138900 | 2140152 | 1  | 1       | RO3G_00461.1 | RO3G_06287.1 | 294  | 301  | 56.81 |  |  |
| 1170026      | 1172275    | 2142082 | 2144478 | -1 | -1      | RO3G_00462.1 | RO3G_06289.1 | 1031 | 758  | 69.66 |  |  |
| 1174907      | 1176522    | 2150054 | 2151664 | 1  | 1       | RO3G_00463.1 | RO3G_06292.1 | 991  | 520  | 91.54 |  |  |
| ##Scaffold_1 | Scaffold_4 | 2972202 | 3006213 | 4  | 164669  | 209951       | 1            | 7    |      |       |  |  |
| 2972202      | 2972976    | 164669  | 165459  | -1 | -1      | RO3G_01173.1 | RO3G_05587.1 | 135  | 98   | 72.45 |  |  |
| 2973788      | 2977012    | 168658  | 172910  | 1  | 1       | RO3G_01174.1 | RO3G_05589.1 | 870  | 693  | 66.96 |  |  |
| 2977942      | 2979738    | 173228  | 175047  | -1 | -1      | RO3G_01175.1 | RO3G_05590.1 | 659  | 518  | 74.9  |  |  |
| 2980190      | 2987338    | 177360  | 185781  | -1 | -1      | RO3G_01176.1 | RO3G_05593.1 | 1911 | 1562 | 68.63 |  |  |
| 2994842      | 2995714    | 191623  | 193127  | 1  | 1       | RO3G_01181.1 | RO3G_05595.1 | 332  | 226  | 74.78 |  |  |
| 3001057      | 3002940    | 205978  | 207794  | -1 | -1      | RO3G_01184.1 | RO3G_05600.1 | 605  | 522  | 60.73 |  |  |
| 3004847      | 3006213    | 208364  | 209951  | -1 | -1      | RO3G_01185.1 | RO3G_05601.1 | 329  | 509  | 52.85 |  |  |
| ##Scaffold_1 | Scaffold_5 | 1890578 | 1912849 | 5  | 1176735 | 1208769      | -1           | 3    |      |       |  |  |
| 1912091      | 1912849    | 1176735 | 1177506 | 1  | -1      | RO3G_00757.1 | RO3G_07197.1 | 352  | 217  | 78.8  |  |  |
| 1898080      | 1900752    | 1196136 | 1199115 | 1  | -1      | RO3G_00753.1 | RO3G_07203.1 | 944  | 840  | 69.05 |  |  |
| 1890578      | 1892979    | 1206610 | 1208769 | -1 | 1       | RO3G_00751.1 | RO3G_07207.1 | 993  | 618  | 78.96 |  |  |
| ##Scaffold_1 | Scaffold_5 | 2397795 | 2406846 | 5  | 1102946 | 1129110      | -1           | 3    |      |       |  |  |
| 2405151      | 2406846    | 1102946 | 1105346 | -1 | 1       | RO3G_00950.1 | RO3G_07163.1 | 893  | 505  | 87.33 |  |  |
| 2401358      | 2404385    | 1105862 | 1109546 | -1 | 1       | RO3G_00949.1 | RO3G_07164.1 | 216  | 136  | 80.15 |  |  |
| 2397795      | 2398214    | 1128552 | 1129110 | -1 | 1       | RO3G_00946.1 | RO3G_07174.1 | 153  | 83   | 83.13 |  |  |
| ##Scaffold_1 | Scaffold_5 | 2424381 | 2431836 | 5  | 1163181 | 1168487      | -1           | 3    |      |       |  |  |
| 2430998      | 2431836    | 1163181 | 1164072 | -1 | 1       | RO3G_00960.1 | RO3G_07189.1 | 235  | 292  | 47.6  |  |  |
| 2425616      | 2426098    | 1166410 | 1167443 | 1  | -1      | RO3G_00957.1 | RO3G_07192.1 | 114  | 85   | 67.06 |  |  |
| 2424381      | 2424943    | 1168072 | 1168487 | 1  | -1      | RO3G_00955.1 | RO3G_07193.1 | 175  | 90   | 88.89 |  |  |
| ##Scaffold_1 | Scaffold_5 | 2614313 | 2623817 | 5  | 1241736 | 1247214      | -1           | 3    |      |       |  |  |
| 2623035      | 2623817    | 1241736 | 1242539 | 1  | -1      | RO3G_01036.1 | RO3G_07222.1 | 237  | 117  | 98.29 |  |  |
| 2620445      | 2620915    | 1244986 | 1245436 | -1 | 1       | RO3G_01034.1 | RO3G_07224.1 | 226  | 111  | 97.3  |  |  |
| 2614313      | 2614637    | 1246586 | 1247214 | 1  | -1      | RO3G_01033.1 | RO3G_07225.1 | 157  | 88   | 86.36 |  |  |
| ##Scaffold_1 | Scaffold_5 | 4846119 | 4857658 | 5  | 284891  | 294155       | 1            | 3    |      |       |  |  |
| 4846119      | 4853721    | 284891  | 291199  | 1  | 1       | RO3G_01878.1 | RO3G_06842.1 | 2300 | 2107 | 61.32 |  |  |
| 4853981      | 4854441    | 292625  | 293021  | 1  | 1       | RO3G_01879.1 | RO3G_06844.1 | 135  | 108  | 62.04 |  |  |
| 4856675      | 4857658    | 293315  | 294155  | 1  | 1       | RO3G_01881.1 | RO3G_06845.1 | 519  | 264  | 94.32 |  |  |
| ##Scaffold_1 | Scaffold_6 | 394357  | 414176  | 6  | 399814  | 429722       | 1            | 4    |      |       |  |  |
| 394357       | 395425     | 399814  | 400037  | 1  | 1       | RO3G_00161.1 | RO3G_08130.1 | 103  | 58   | 77.59 |  |  |
| 400698       | 401562     | 406132  | 406827  | 1  | 1       | RO3G_00163.1 | RO3G_08133.1 | 202  | 183  | 60.66 |  |  |
| 410089       | 410917     | 421528  | 422334  | 1  | 1       | RO3G_00166.1 | RO3G_08137.1 | 236  | 160  | 82.5  |  |  |
| 411492       | 414176     | 426908  | 429722  | 1  | 1       | RO3G_00167.1 | RO3G_08138.1 | 1179 | 702  | 86.47 |  |  |
| ##Scaffold_1 | Scaffold_6 | 486036  | 533978  | 6  | 847739  | 882999       | 1            | 6    |      |       |  |  |
| 486036       | 486775     | 847739  | 848993  | -1 | -1      | RO3G_00194.1 | RO3G_08318.1 | 389  | 211  | 93.36 |  |  |
| 494115       | 495180     | 850808  | 851873  | 1  | 1       | RO3G_00198.1 | RO3G_08319.1 | 652  | 337  | 99.41 |  |  |
| 509648       | 511095     | 859296  | 860906  | -1 | -1      | RO3G_00204.1 | RO3G_08323.1 | 818  | 417  | 92.09 |  |  |
| 517085       | 517463     | 863283  | 863649  | -1 | -1      | RO3G_00209.1 | RO3G_08326.1 | 135  | 69   | 98.55 |  |  |
| 525489       | 526277     | 871977  | 872666  | 1  | 1       | RO3G_00212.1 | RO3G_08331.1 | 351  | 264  | 64.77 |  |  |
| 533256       | 533978     | 881722  | 882999  | -1 | -1      | RO3G_00214.1 | RO3G_08336.1 | 303  | 242  | 67.36 |  |  |
| ##Scaffold_1 | Scaffold_6 | 654546  | 678588  | 6  | 955647  | 981199       | 1            | 6    |      |       |  |  |

|               |             |         |         |    |         |              |              |      |      |       |
|---------------|-------------|---------|---------|----|---------|--------------|--------------|------|------|-------|
| 654546        | 656393      | 955647  | 957410  | 1  | 1       | RO3G_00266.1 | RO3G_08359.1 | 649  | 579  | 67.7  |
| 658739        | 661879      | 959039  | 962179  | 1  | 1       | RO3G_00267.1 | RO3G_08360.1 | 1818 | 1006 | 92.84 |
| 666450        | 667721      | 964238  | 965584  | -1 | -1      | RO3G_00269.1 | RO3G_08362.1 | 585  | 449  | 74.83 |
| 668103        | 668718      | 965816  | 966444  | -1 | -1      | RO3G_00270.1 | RO3G_08363.1 | 142  | 110  | 100   |
| 669230        | 669983      | 968865  | 969749  | -1 | -1      | RO3G_00271.1 | RO3G_08365.1 | 187  | 203  | 52.71 |
| 672180        | 678588      | 974037  | 981199  | 1  | 1       | RO3G_00272.1 | RO3G_08367.1 | 2977 | 2012 | 77.34 |
| ##Scaffold_1  | Scaffold_6  | 785073  | 807634  | 6  | 1153773 | 1173157      | 1            | 4    |      |       |
| 785073        | 789371      | 1153773 | 1157135 | 1  | 1       | RO3G_00315.1 | RO3G_08439.1 | 1686 | 929  | 92.9  |
| 789436        | 790032      | 1157426 | 1158028 | -1 | -1      | RO3G_00316.1 | RO3G_08440.1 | 266  | 171  | 87.13 |
| 804010        | 805187      | 1168075 | 1169404 | 1  | 1       | RO3G_00319.1 | RO3G_08444.1 | 313  | 226  | 64.6  |
| 805880        | 807634      | 1171385 | 1173157 | 1  | 1       | RO3G_00320.1 | RO3G_08446.1 | 486  | 524  | 56.87 |
| ##Scaffold_1  | Scaffold_6  | 829553  | 846791  | 6  | 1073857 | 1091838      | -1           | 6    |      |       |
| 845284        | 846791      | 1073857 | 1075341 | 1  | -1      | RO3G_00340.1 | RO3G_08406.1 | 800  | 456  | 87.28 |
| 843437        | 845082      | 1075501 | 1077035 | -1 | -1      | RO3G_00339.1 | RO3G_08407.1 | 373  | 246  | 81.71 |
| 841490        | 842916      | 1077739 | 1079358 | -1 | 1       | RO3G_00338.1 | RO3G_08408.1 | 427  | 399  | 56.39 |
| 837684        | 838528      | 1080867 | 1081686 | 1  | -1      | RO3G_00336.1 | RO3G_08410.1 | 452  | 255  | 99.61 |
| 832002        | 832837      | 1086848 | 1087787 | 1  | -1      | RO3G_00334.1 | RO3G_08413.1 | 253  | 267  | 61.8  |
| 829553        | 830746      | 1090596 | 1091838 | -1 | 1       | RO3G_00333.1 | RO3G_08414.1 | 397  | 301  | 79.73 |
| ##Scaffold_1  | Scaffold_6  | 810392  | 817733  | 6  | 1102415 | 1118141      | -1           | 3    |      |       |
| 816074        | 817733      | 1102415 | 1104643 | -1 | 1       | RO3G_00326.1 | RO3G_08421.1 | 547  | 515  | 58.25 |
| 811849        | 813439      | 1113209 | 1113858 | -1 | -1      | RO3G_00324.1 | RO3G_08424.1 | 166  | 135  | 57.78 |
| 810392        | 811004      | 1117521 | 1118141 | 1  | -1      | RO3G_00323.1 | RO3G_08426.1 | 386  | 187  | 98.93 |
| ##Scaffold_1  | Scaffold_6  | 935161  | 969261  | 6  | 1198522 | 1217859      | 1            | 5    |      |       |
| 935161        | 935913      | 1198522 | 1199378 | -1 | -1      | RO3G_00379.1 | RO3G_08459.1 | 255  | 201  | 68.16 |
| 942750        | 943529      | 1204967 | 1206097 | 1  | 1       | RO3G_00383.1 | RO3G_08461.1 | 385  | 242  | 72.31 |
| 955533        | 957527      | 1207551 | 1209769 | -1 | -1      | RO3G_00389.1 | RO3G_08462.1 | 496  | 434  | 59.91 |
| 958010        | 959884      | 1210170 | 1212004 | -1 | -1      | RO3G_00390.1 | RO3G_08463.1 | 594  | 513  | 66.86 |
| 968827        | 969261      | 1216779 | 1217859 | -1 | -1      | RO3G_00393.1 | RO3G_08466.1 | 185  | 94   | 95.74 |
| ##Scaffold_1  | Scaffold_7  | 1988610 | 2001432 | 7  | 693558  | 704247       | 1            | 4    |      |       |
| 1988610       | 1989401     | 693558  | 694330  | -1 | -1      | RO3G_00782.1 | RO3G_09466.1 | 262  | 139  | 97.12 |
| 1990975       | 1992436     | 696908  | 697807  | 1  | 1       | RO3G_00784.1 | RO3G_09467.1 | 348  | 241  | 71.78 |
| 1996455       | 1998262     | 700677  | 702201  | -1 | -1      | RO3G_00787.1 | RO3G_09469.1 | 806  | 459  | 89.11 |
| 1999999       | 2001432     | 702821  | 704247  | -1 | -1      | RO3G_00788.1 | RO3G_09470.1 | 908  | 458  | 94.32 |
| ##Scaffold_1  | Scaffold_7  | 2357046 | 2395646 | 7  | 616962  | 648491       | 1            | 7    |      |       |
| 2357046       | 2358601     | 616962  | 618451  | -1 | -1      | RO3G_00928.1 | RO3G_09434.1 | 313  | 335  | 51.04 |
| 2362777       | 2363787     | 621022  | 622099  | 1  | 1       | RO3G_00930.1 | RO3G_09435.1 | 146  | 176  | 50.57 |
| 2377959       | 2378477     | 625083  | 625598  | -1 | -1      | RO3G_00935.1 | RO3G_09437.1 | 182  | 172  | 66.86 |
| 2381629       | 2382382     | 632491  | 633266  | -1 | -1      | RO3G_00937.1 | RO3G_09441.1 | 329  | 194  | 84.54 |
| 2383673       | 2384366     | 638102  | 638791  | 1  | 1       | RO3G_00938.1 | RO3G_09443.1 | 227  | 129  | 100   |
| 2386729       | 2388117     | 642076  | 643556  | 1  | 1       | RO3G_00940.1 | RO3G_09445.1 | 225  | 159  | 78.62 |
| 2394231       | 2395646     | 647547  | 648491  | 1  | 1       | RO3G_00944.1 | RO3G_09448.1 | 127  | 301  | 33.55 |
| ##Scaffold_1  | Scaffold_7  | 2829063 | 2837823 | 7  | 709382  | 719654       | 1            | 3    |      |       |
| 2829063       | 2830103     | 709382  | 710410  | 1  | 1       | RO3G_01119.1 | RO3G_09474.1 | 427  | 357  | 68.63 |
| 2830284       | 2831463     | 711026  | 712238  | 1  | 1       | RO3G_01120.1 | RO3G_09475.1 | 506  | 355  | 72.39 |
| 2835635       | 2837823     | 717503  | 719654  | 1  | 1       | RO3G_01122.1 | RO3G_09477.1 | 939  | 546  | 87    |
| ##Scaffold_1  | Scaffold_8  | 4065932 | 4085664 | 8  | 1292334 | 1312917      | 1            | 4    |      |       |
| 4065932       | 4066982     | 1292334 | 1293342 | -1 | -1      | RO3G_01567.1 | RO3G_10690.1 | 315  | 321  | 52.96 |
| 4069170       | 4070147     | 1293689 | 1295221 | -1 | -1      | RO3G_01568.1 | RO3G_10691.1 | 173  | 239  | 47.7  |
| 4080081       | 4082695     | 1308108 | 1310699 | 1  | 1       | RO3G_01572.1 | RO3G_10698.1 | 1269 | 729  | 89.85 |
| 4084840       | 4085664     | 1312075 | 1312917 | -1 | -1      | RO3G_01575.1 | RO3G_10700.1 | 375  | 233  | 78.97 |
| ##Scaffold_1  | Scaffold_9  | 3850424 | 3897497 | 9  | 720021  | 733759       | -1           | 3    |      |       |
| 3850424       | 3852096     | 720021  | 721521  | 1  | -1      | RO3G_01479.1 | RO3G_11353.1 | 514  | 444  | 64.64 |
| 3896219       | 3897497     | 725339  | 726915  | 1  | -1      | RO3G_01499.1 | RO3G_11355.1 | 715  | 373  | 97.32 |
| 3892367       | 3893677     | 732951  | 733759  | 1  | -1      | RO3G_01501.1 | RO3G_11359.1 | 190  | 215  | 56.28 |
| ##Scaffold_10 | Scaffold_10 | 1080258 | 1103313 | 10 | 1734757 | 1756923      | 1            | 3    |      |       |
| 1080258       | 1081360     | 1734757 | 1735857 | 1  | 1       | RO3G_12371.1 | RO3G_12626.1 | 472  | 255  | 93.33 |
| 1086319       | 1086831     | 1747000 | 1747530 | 1  | 1       | RO3G_12374.1 | RO3G_12632.1 | 139  | 83   | 87.95 |
| 1102298       | 1103313     | 1755625 | 1756923 | -1 | -1      | RO3G_12378.1 | RO3G_12635.1 | 373  | 311  | 63.34 |
| ##Scaffold_10 | Scaffold_12 | 683317  | 704568  | 12 | 204914  | 223550       | -1           | 5    |      |       |
| 701979        | 704568      | 204914  | 207685  | -1 | 1       | RO3G_12218.1 | RO3G_13371.1 | 1310 | 798  | 89.22 |
| 695324        | 696896      | 208449  | 210072  | -1 | -1      | RO3G_12215.1 | RO3G_13372.1 | 725  | 490  | 77.96 |
| 693559        | 695058      | 210400  | 211851  | 1  | -1      | RO3G_12214.1 | RO3G_13373.1 | 518  | 344  | 79.36 |
| 691409        | 691672      | 217374  | 217971  | -1 | 1       | RO3G_12212.1 | RO3G_13375.1 | 137  | 87   | 78.16 |
| 683317        | 685229      | 221585  | 223550  | -1 | 1       | RO3G_12210.1 | RO3G_13377.1 | 1088 | 565  | 99.47 |
| ##Scaffold_10 | Scaffold_13 | 1559584 | 1587356 | 13 | 370923  | 409571       | -1           | 5    |      |       |
| 1586151       | 1587356     | 370923  | 372211  | 1  | -1      | RO3G_12562.1 | RO3G_13996.1 | 408  | 354  | 66.1  |
| 1580956       | 1582178     | 375414  | 376617  | 1  | -1      | RO3G_12560.1 | RO3G_13999.1 | 398  | 368  | 71.74 |

|               |             |         |         |    |         |              |              |      |      |       |
|---------------|-------------|---------|---------|----|---------|--------------|--------------|------|------|-------|
| 1573558       | 1574905     | 381164  | 382504  | 1  | -1      | RO3G_12558.1 | RO3G_14002.1 | 754  | 375  | 100   |
| 1565236       | 1567832     | 398112  | 400596  | -1 | 1       | RO3G_12555.1 | RO3G_14007.1 | 823  | 779  | 61.23 |
| 1559584       | 1560042     | 409135  | 409571  | -1 | 1       | RO3G_12552.1 | RO3G_14011.1 | 227  | 120  | 95    |
| ##Scaffold_10 | Scaffold_2  | 853442  | 861327  | 2  | 650185  | 656949       | 1            | 3    |      |       |
| 853442        | 855061      | 650185  | 651794  | -1 | -1      | RO3G_12286.1 | RO3G_02460.1 | 904  | 502  | 91.63 |
| 855373        | 858361      | 652381  | 655406  | -1 | -1      | RO3G_12287.1 | RO3G_02461.1 | 988  | 806  | 65.01 |
| 860803        | 861327      | 656433  | 656949  | -1 | -1      | RO3G_12289.1 | RO3G_02462.1 | 309  | 154  | 99.35 |
| ##Scaffold_10 | Scaffold_5  | 387243  | 405997  | 5  | 2760005 | 2778261      | -1           | 4    |      |       |
| 405241        | 405997      | 2760005 | 2760738 | -1 | 1       | RO3G_12100.1 | RO3G_07776.1 | 175  | 105  | 77.14 |
| 393939        | 396779      | 2767509 | 2769452 | -1 | 1       | RO3G_12097.1 | RO3G_07777.1 | 373  | 639  | 40.06 |
| 388049        | 389359      | 2776151 | 2777449 | -1 | 1       | RO3G_12094.1 | RO3G_07780.1 | 455  | 437  | 68.65 |
| 387243        | 387683      | 2777569 | 2778261 | -1 | 1       | RO3G_12093.1 | RO3G_07781.1 | 124  | 144  | 48.61 |
| ##Scaffold_10 | Scaffold_5  | 1655515 | 1693883 | 5  | 3069201 | 3100696      | -1           | 5    |      |       |
| 1693497       | 1693883     | 3069201 | 3069577 | -1 | 1       | RO3G_12604.1 | RO3G_07891.1 | 175  | 86   | 100   |
| 1691835       | 1692419     | 3073085 | 3073411 | 1  | -1      | RO3G_12603.1 | RO3G_07893.1 | 114  | 91   | 61.54 |
| 1687967       | 1690641     | 3076010 | 3078755 | -1 | 1       | RO3G_12602.1 | RO3G_07895.1 | 1468 | 813  | 98.52 |
| 1668749       | 1671536     | 3084734 | 3086882 | 1  | -1      | RO3G_12596.1 | RO3G_07899.1 | 755  | 546  | 79.49 |
| 1655515       | 1656142     | 3100069 | 3100696 | -1 | 1       | RO3G_12591.1 | RO3G_07906.1 | 336  | 193  | 94.82 |
| ##Scaffold_10 | Scaffold_7  | 1409123 | 1424946 | 7  | 1614670 | 1640631      | -1           | 4    |      |       |
| 1423894       | 1424946     | 1614670 | 1615725 | 1  | -1      | RO3G_12503.1 | RO3G_09808.1 | 130  | 325  | 34.15 |
| 1419154       | 1419905     | 1626622 | 1627394 | -1 | 1       | RO3G_12500.1 | RO3G_09814.1 | 200  | 190  | 53.68 |
| 1414910       | 1415732     | 1632073 | 1632916 | 1  | -1      | RO3G_12499.1 | RO3G_09817.1 | 377  | 190  | 95.26 |
| 1409123       | 1410140     | 1639892 | 1640631 | 1  | -1      | RO3G_12497.1 | RO3G_09820.1 | 222  | 232  | 48.28 |
| ##Scaffold_11 | Scaffold_10 | 1371433 | 1423042 | 10 | 1362372 | 1376242      | -1           | 3    |      |       |
| 1422038       | 1423042     | 1362372 | 1363564 | -1 | 1       | RO3G_13213.1 | RO3G_12477.1 | 270  | 393  | 45.8  |
| 1377993       | 1380222     | 1368339 | 1370237 | -1 | 1       | RO3G_13197.1 | RO3G_12481.1 | 878  | 476  | 97.27 |
| 1371433       | 1375364     | 1372203 | 1376242 | 1  | -1      | RO3G_13195.1 | RO3G_12484.1 | 1566 | 1297 | 70.24 |
| ##Scaffold_11 | Scaffold_13 | 1522316 | 1555103 | 13 | 71703   | 97727        | 1            | 4    |      |       |
| 1522316       | 1523426     | 71703   | 73094   | 1  | 1       | RO3G_13239.1 | RO3G_13885.1 | 285  | 302  | 53.97 |
| 1526851       | 1528704     | 80562   | 82458   | 1  | 1       | RO3G_13242.1 | RO3G_13888.1 | 1063 | 548  | 99.27 |
| 1531811       | 1536534     | 85756   | 90382   | -1 | -1      | RO3G_13244.1 | RO3G_13890.1 | 2151 | 1476 | 79.61 |
| 1553598       | 1555103     | 96430   | 97727   | -1 | -1      | RO3G_13253.1 | RO3G_13893.1 | 529  | 385  | 72.47 |
| ##Scaffold_11 | Scaffold_2  | 1319791 | 1326508 | 2  | 3312999 | 3317753      | 1            | 3    |      |       |
| 1319791       | 1321792     | 3312999 | 3314956 | 1  | 1       | RO3G_13175.1 | RO3G_03536.1 | 1102 | 626  | 88.02 |
| 1325085       | 1325680     | 3315374 | 3316657 | 1  | 1       | RO3G_13177.1 | RO3G_03537.1 | 193  | 101  | 86.14 |
| 1326012       | 1326508     | 3317204 | 3317753 | 1  | 1       | RO3G_13178.1 | RO3G_03538.1 | 283  | 147  | 96.6  |
| ##Scaffold_11 | Scaffold_7  | 357498  | 408416  | 7  | 1279187 | 1307505      | -1           | 5    |      |       |
| 365459        | 366081      | 1279187 | 1280407 | -1 | 1       | RO3G_12813.1 | RO3G_09688.1 | 186  | 115  | 80    |
| 357498        | 359891      | 1284203 | 1284685 | -1 | 1       | RO3G_12810.1 | RO3G_09690.1 | 201  | 120  | 84.17 |
| 407240        | 408416      | 1303245 | 1304608 | -1 | -1      | RO3G_12831.1 | RO3G_09697.1 | 497  | 338  | 84.91 |
| 396375        | 396666      | 1304945 | 1305240 | -1 | 1       | RO3G_12827.1 | RO3G_09698.1 | 128  | 58   | 100   |
| 395597        | 396202      | 1305340 | 1307505 | 1  | -1      | RO3G_12826.1 | RO3G_09699.1 | 351  | 202  | 89.11 |
| ##Scaffold_11 | Scaffold_7  | 455270  | 467845  | 7  | 968739  | 983700       | 1            | 4    |      |       |
| 455270        | 457630      | 968739  | 971172  | -1 | -1      | RO3G_12847.1 | RO3G_09565.1 | 597  | 716  | 54.47 |
| 460827        | 461661      | 975546  | 976061  | 1  | 1       | RO3G_12849.1 | RO3G_09567.1 | 282  | 146  | 93.84 |
| 463814        | 465216      | 979475  | 980824  | 1  | 1       | RO3G_12852.1 | RO3G_09569.1 | 464  | 323  | 76.47 |
| 466206        | 467845      | 982544  | 983700  | -1 | -1      | RO3G_12853.1 | RO3G_09570.1 | 274  | 211  | 70.14 |
| ##Scaffold_11 | Scaffold_7  | 793284  | 825051  | 7  | 2012829 | 2040537      | 1            | 5    |      |       |
| 793284        | 794731      | 2012829 | 2014011 | -1 | -1      | RO3G_12983.1 | RO3G_09971.1 | 332  | 251  | 69.32 |
| 798438        | 800350      | 2017609 | 2018681 | -1 | -1      | RO3G_12984.1 | RO3G_09974.1 | 347  | 299  | 66.56 |
| 810030        | 811428      | 2021520 | 2022797 | 1  | 1       | RO3G_12988.1 | RO3G_09976.1 | 351  | 344  | 51.74 |
| 812979        | 813735      | 2024581 | 2025308 | 1  | 1       | RO3G_12989.1 | RO3G_09978.1 | 329  | 233  | 81.55 |
| 824237        | 825051      | 2039276 | 2040537 | 1  | 1       | RO3G_12994.1 | RO3G_09984.1 | 330  | 196  | 80.1  |
| ##Scaffold_11 | Scaffold_7  | 919304  | 956342  | 7  | 2454580 | 2477967      | -1           | 5    |      |       |
| 954473        | 956342      | 2454580 | 2456418 | -1 | 1       | RO3G_13040.1 | RO3G_10147.1 | 882  | 515  | 82.52 |
| 945093        | 946170      | 2459195 | 2460075 | -1 | -1      | RO3G_13037.1 | RO3G_10149.1 | 125  | 95   | 68.42 |
| 926036        | 930545      | 2464669 | 2470275 | 1  | -1      | RO3G_13033.1 | RO3G_10151.1 | 2404 | 1422 | 84.46 |
| 920889        | 923845      | 2471185 | 2475124 | -1 | 1       | RO3G_13032.1 | RO3G_10152.1 | 976  | 834  | 63.07 |
| 919304        | 920398      | 2476717 | 2477967 | 1  | -1      | RO3G_13031.1 | RO3G_10153.1 | 625  | 329  | 92.1  |
| ##Scaffold_11 | Scaffold_7  | 1051541 | 1077070 | 7  | 2118455 | 2140017      | 1            | 7    |      |       |
| 1051541       | 1053088     | 2118455 | 2119687 | -1 | -1      | RO3G_13078.1 | RO3G_10020.1 | 287  | 242  | 64.46 |
| 1055117       | 1055825     | 2122455 | 2124043 | 1  | 1       | RO3G_13080.1 | RO3G_10022.1 | 224  | 165  | 70.3  |
| 1057973       | 1059248     | 2124465 | 2125731 | 1  | 1       | RO3G_13082.1 | RO3G_10023.1 | 559  | 333  | 97.3  |
| 1059818       | 1060344     | 2126301 | 2126825 | 1  | 1       | RO3G_13083.1 | RO3G_10024.1 | 221  | 139  | 98.56 |
| 1067739       | 1068272     | 2135249 | 2135774 | 1  | 1       | RO3G_13087.1 | RO3G_10028.1 | 300  | 155  | 92.9  |
| 1070052       | 1070958     | 2136755 | 2137687 | -1 | -1      | RO3G_13088.1 | RO3G_10030.1 | 186  | 287  | 42.86 |
| 1074801       | 1077070     | 2138601 | 2140017 | -1 | -1      | RO3G_13089.1 | RO3G_10031.1 | 470  | 335  | 71.34 |

|               |              |         |         |    |         |              |              |      |      |       |  |  |  |
|---------------|--------------|---------|---------|----|---------|--------------|--------------|------|------|-------|--|--|--|
| ##Scaffold_11 | Scaffold_7   | 1099966 | 1144592 | 7  | 2210606 | 2234153      | 1            | 5    |      |       |  |  |  |
| 1099966       | 1101185      | 2210606 | 2211915 | -1 | -1      | RO3G_13097.1 | RO3G_10055.1 | 568  | 336  | 92.86 |  |  |  |
| 1109666       | 1113621      | 2213341 | 2216911 | -1 | -1      | RO3G_13100.1 | RO3G_10056.1 | 1696 | 1072 | 76.87 |  |  |  |
| 1129970       | 1131967      | 2223968 | 2225736 | 1  | 1       | RO3G_13109.1 | RO3G_10059.1 | 730  | 561  | 72.37 |  |  |  |
| 1137472       | 1139778      | 2229823 | 2232101 | 1  | 1       | RO3G_13112.1 | RO3G_10063.1 | 1252 | 687  | 91.7  |  |  |  |
| 1143698       | 1144592      | 2233074 | 2234153 | 1  | 1       | RO3G_13115.1 | RO3G_10064.1 | 124  | 173  | 59.54 |  |  |  |
| ##Scaffold_11 | Scaffold_8   | 70488   | 105426  | 8  | 564463  | 589638       | -1           | 5    |      |       |  |  |  |
| 104534        | 105426       | 564463  | 565240  | -1 | 1       | RO3G_12705.1 | RO3G_10439.1 | 237  | 202  | 60.4  |  |  |  |
| 99754         | 101281       | 567051  | 568798  | -1 | 1       | RO3G_12703.1 | RO3G_10440.1 | 710  | 539  | 72.91 |  |  |  |
| 95501         | 97828        | 574702  | 577051  | 1  | -1      | RO3G_12701.1 | RO3G_10443.1 | 1173 | 659  | 86.34 |  |  |  |
| 83661         | 86114        | 580470  | 581483  | 1  | -1      | RO3G_12696.1 | RO3G_10445.1 | 278  | 326  | 50.31 |  |  |  |
| 70488         | 71437        | 588659  | 589638  | -1 | 1       | RO3G_12690.1 | RO3G_10448.1 | 200  | 272  | 45.59 |  |  |  |
| ##Scaffold_11 | Scaffold_8   | 531478  | 577924  | 8  | 418629  | 488958       | -1           | 8    |      |       |  |  |  |
| 577171        | 577924       | 418629  | 419373  | -1 | 1       | RO3G_12899.1 | RO3G_10390.1 | 187  | 152  | 63.82 |  |  |  |
| 575026        | 577107       | 419537  | 421758  | 1  | -1      | RO3G_12898.1 | RO3G_10391.1 | 801  | 619  | 66.07 |  |  |  |
| 568351        | 570212       | 431233  | 433002  | -1 | 1       | RO3G_12896.1 | RO3G_10395.1 | 786  | 526  | 72.05 |  |  |  |
| 555356        | 559848       | 451193  | 457439  | -1 | 1       | RO3G_12891.1 | RO3G_10401.1 | 2891 | 1959 | 78.76 |  |  |  |
| 547449        | 549439       | 458934  | 460909  | -1 | 1       | RO3G_12888.1 | RO3G_10403.1 | 1092 | 610  | 97.21 |  |  |  |
| 535833        | 538644       | 474745  | 477184  | -1 | 1       | RO3G_12884.1 | RO3G_10406.1 | 886  | 661  | 77.31 |  |  |  |
| 532841        | 534853       | 483336  | 485261  | -1 | 1       | RO3G_12883.1 | RO3G_10408.1 | 1023 | 536  | 95.9  |  |  |  |
| 531478        | 532477       | 487977  | 488958  | -1 | 1       | RO3G_12882.1 | RO3G_10410.1 | 449  | 248  | 97.58 |  |  |  |
| ##Scaffold_11 | Scaffold_8   | 691772  | 697662  | 8  | 387225  | 397690       | 1            | 3    |      |       |  |  |  |
| 691772        | 692352       | 387225  | 387815  | 1  | 1       | RO3G_12944.1 | RO3G_10377.1 | 323  | 159  | 98.11 |  |  |  |
| 695570        | 696612       | 395750  | 396437  | 1  | 1       | RO3G_12946.1 | RO3G_10382.1 | 273  | 187  | 71.12 |  |  |  |
| 696945        | 697662       | 396790  | 397690  | -1 | -1      | RO3G_12947.1 | RO3G_10383.1 | 375  | 219  | 86.3  |  |  |  |
| ##Scaffold_12 | Scaffold_10  | 200188  | 217971  | 10 | 691409  | 706852       | -1           | 5    |      |       |  |  |  |
| 217374        | 217971       | 691409  | 691672  | 1  | -1      | RO3G_13375.1 | RO3G_12212.1 | 137  | 87   | 78.16 |  |  |  |
| 210400        | 211851       | 693559  | 695058  | -1 | 1       | RO3G_13373.1 | RO3G_12214.1 | 518  | 344  | 79.36 |  |  |  |
| 208449        | 210072       | 695324  | 696896  | -1 | 1       | RO3G_13372.1 | RO3G_12215.1 | 725  | 490  | 77.96 |  |  |  |
| 204914        | 207685       | 701979  | 704568  | 1  | -1      | RO3G_13371.1 | RO3G_12218.1 | 1310 | 798  | 89.22 |  |  |  |
| 200188        | 200659       | 706144  | 706852  | -1 | 1       | RO3G_13369.1 | RO3G_12219.1 | 95.5 | 89   | 52.81 |  |  |  |
| ##Scaffold_12 | 5Scaffold_12 | 66318   | 96738   | 5  | 1366150 | 1406956      | -1           | 8    |      |       |  |  |  |
| 95427         | 96738        | 1366150 | 1367799 | 1  | -1      | RO3G_13328.1 | RO3G_07277.1 | 533  | 349  | 74.21 |  |  |  |
| 90231         | 92170        | 1369429 | 1371353 | -1 | 1       | RO3G_13326.1 | RO3G_07278.1 | 265  | 172  | 76.74 |  |  |  |
| 87817         | 89540        | 1372611 | 1377228 | -1 | 1       | RO3G_13325.1 | RO3G_07279.1 | 148  | 291  | 45.7  |  |  |  |
| 86079         | 87765        | 1377537 | 1379356 | 1  | -1      | RO3G_13324.1 | RO3G_07280.1 | 344  | 321  | 63.24 |  |  |  |
| 81014         | 83061        | 1389965 | 1391077 | -1 | 1       | RO3G_13322.1 | RO3G_07285.1 | 398  | 259  | 78.76 |  |  |  |
| 78173         | 80461        | 1396284 | 1398384 | -1 | 1       | RO3G_13321.1 | RO3G_07288.1 | 1219 | 627  | 98.88 |  |  |  |
| 74784         | 76481        | 1401574 | 1403203 | -1 | 1       | RO3G_13320.1 | RO3G_07291.1 | 620  | 545  | 62.39 |  |  |  |
| 66318         | 67259        | 1406205 | 1406956 | 1  | -1      | RO3G_13317.1 | RO3G_07292.1 | 237  | 188  | 73.4  |  |  |  |
| ##Scaffold_12 | Scaffold_5   | 594006  | 618878  | 5  | 1311107 | 1332861      | -1           | 4    |      |       |  |  |  |
| 618054        | 618878       | 1311107 | 1312559 | 1  | -1      | RO3G_13516.1 | RO3G_07251.1 | 335  | 205  | 80.49 |  |  |  |
| 610830        | 613264       | 1316448 | 1319343 | -1 | 1       | RO3G_13513.1 | RO3G_07254.1 | 865  | 750  | 70.53 |  |  |  |
| 602159        | 603096       | 1325734 | 1328585 | -1 | 1       | RO3G_13509.1 | RO3G_07259.1 | 367  | 241  | 75.1  |  |  |  |
| 594006        | 596466       | 1330441 | 1332861 | -1 | 1       | RO3G_13506.1 | RO3G_07261.1 | 1231 | 812  | 81.65 |  |  |  |
| ##Scaffold_12 | Scaffold_9   | 910657  | 923587  | 9  | 335729  | 347289       | -1           | 3    |      |       |  |  |  |
| 921387        | 923587       | 335729  | 337927  | -1 | 1       | RO3G_13636.1 | RO3G_11230.1 | 1148 | 673  | 99.85 |  |  |  |
| 917035        | 919225       | 339394  | 341466  | 1  | -1      | RO3G_13634.1 | RO3G_11231.1 | 753  | 594  | 64.31 |  |  |  |
| 910657        | 913652       | 344142  | 347289  | -1 | 1       | RO3G_13632.1 | RO3G_11233.1 | 1439 | 850  | 87.88 |  |  |  |
| ##Scaffold_13 | Scaffold_10  | 367553  | 400596  | 10 | 1565236 | 1598400      | -1           | 5    |      |       |  |  |  |
| 398112        | 400596       | 1565236 | 1567832 | 1  | -1      | RO3G_14007.1 | RO3G_12555.1 | 823  | 779  | 61.23 |  |  |  |
| 381164        | 382504       | 1573558 | 1574905 | -1 | 1       | RO3G_14002.1 | RO3G_12558.1 | 754  | 375  | 100   |  |  |  |
| 375414        | 376617       | 1580956 | 1582178 | -1 | 1       | RO3G_13999.1 | RO3G_12560.1 | 398  | 368  | 71.74 |  |  |  |
| 370923        | 372211       | 1586151 | 1587356 | -1 | 1       | RO3G_13996.1 | RO3G_12562.1 | 408  | 354  | 66.1  |  |  |  |
| 367553        | 368071       | 1597881 | 1598400 | -1 | 1       | RO3G_13994.1 | RO3G_12565.1 | 129  | 117  | 57.26 |  |  |  |
| ##Scaffold_13 | Scaffold_11  | 71703   | 97727   | 11 | 1522316 | 1555103      | 1            | 4    |      |       |  |  |  |
| 71703         | 73094        | 1522316 | 1523426 | 1  | 1       | RO3G_13885.1 | RO3G_13239.1 | 285  | 302  | 53.97 |  |  |  |
| 80562         | 82458        | 1526851 | 1528704 | 1  | 1       | RO3G_13888.1 | RO3G_13242.1 | 1063 | 548  | 99.27 |  |  |  |
| 85756         | 90382        | 1531811 | 1536534 | -1 | -1      | RO3G_13890.1 | RO3G_13244.1 | 2151 | 1476 | 79.61 |  |  |  |
| 96430         | 97727        | 1553598 | 1555103 | -1 | -1      | RO3G_13893.1 | RO3G_13253.1 | 529  | 385  | 72.47 |  |  |  |
| ##Scaffold_13 | Scaffold_2   | 261856  | 287461  | 2  | 383892  | 414392       | 1            | 7    |      |       |  |  |  |
| 261856        | 263303       | 383892  | 384846  | -1 | -1      | RO3G_13946.1 | RO3G_02363.1 | 457  | 242  | 97.11 |  |  |  |
| 266466        | 268547       | 396963  | 399220  | 1  | 1       | RO3G_13948.1 | RO3G_02368.1 | 409  | 636  | 42.45 |  |  |  |
| 268962        | 269339       | 400906  | 401273  | 1  | 1       | RO3G_13949.1 | RO3G_02369.1 | 189  | 106  | 83.02 |  |  |  |
| 269551        | 270911       | 401607  | 402046  | 1  | 1       | RO3G_13950.1 | RO3G_02370.1 | 116  | 93   | 73.12 |  |  |  |
| 271109        | 273334       | 402819  | 404638  | -1 | -1      | RO3G_13951.1 | RO3G_02371.1 | 672  | 501  | 72.85 |  |  |  |
| 278964        | 283340       | 406190  | 409908  | -1 | -1      | RO3G_13953.1 | RO3G_02372.1 | 1279 | 921  | 74.27 |  |  |  |
| 287065        | 287461       | 413976  | 414392  | -1 | -1      | RO3G_13955.1 | RO3G_02374.1 | 114  | 80   | 95    |  |  |  |

|               |             |         |         |         |         |         |              |              |      |     |       |
|---------------|-------------|---------|---------|---------|---------|---------|--------------|--------------|------|-----|-------|
| ##Scaffold_13 | Scaffold_2  | 702376  | 707130  | 2       | 127370  | 137055  | 1            | 3            |      |     |       |
|               | 702376      | 703115  | 127370  | 128699  | -1      | -1      | RO3G_14129.1 | RO3G_02268.1 | 193  | 192 | 52.08 |
|               | 705623      | 706087  | 134786  | 135262  | -1      | -1      | RO3G_14131.1 | RO3G_02272.1 | 182  | 159 | 69.81 |
|               | 706662      | 707130  | 136198  | 137055  | -1      | -1      | RO3G_14132.1 | RO3G_02273.1 | 168  | 106 | 73.58 |
| ##Scaffold_13 | Scaffold_2  | 1086083 | 1099872 | 2       | 595920  | 605377  | 1            | 3            |      |     |       |
|               | 1086083     | 1088146 | 595920  | 597442  | -1      | -1      | RO3G_14281.1 | RO3G_02439.1 | 110  | 206 | 32.52 |
|               | 1092537     | 1095309 | 599997  | 603267  | 1       | 1       | RO3G_14283.1 | RO3G_02440.1 | 907  | 742 | 66.85 |
|               | 1099053     | 1099872 | 603498  | 605377  | -1      | -1      | RO3G_14285.1 | RO3G_02441.1 | 147  | 142 | 55.63 |
| ##Scaffold_13 | Scaffold_2  | 1037443 | 1064434 | 2       | 916178  | 948158  | 1            | 8            |      |     |       |
|               | 1037443     | 1038447 | 916178  | 917068  | 1       | 1       | RO3G_14263.1 | RO3G_02572.1 | 207  | 162 | 69.14 |
|               | 1040414     | 1041202 | 919271  | 920101  | 1       | 1       | RO3G_14264.1 | RO3G_02574.1 | 199  | 246 | 44.31 |
|               | 1044156     | 1044915 | 921543  | 922288  | 1       | 1       | RO3G_14265.1 | RO3G_02576.1 | 336  | 181 | 99.45 |
|               | 1045895     | 1047799 | 931037  | 931730  | -1      | -1      | RO3G_14266.1 | RO3G_02581.1 | 279  | 189 | 71.96 |
|               | 1050505     | 1051980 | 936831  | 938150  | 1       | 1       | RO3G_14267.1 | RO3G_02582.1 | 379  | 377 | 54.11 |
|               | 1054827     | 1055321 | 938733  | 939756  | -1      | -1      | RO3G_14268.1 | RO3G_02583.1 | 171  | 163 | 63.8  |
|               | 1060011     | 1061489 | 944465  | 945928  | -1      | -1      | RO3G_14271.1 | RO3G_02587.1 | 723  | 473 | 76.74 |
|               | 1062479     | 1064434 | 947654  | 948158  | 1       | 1       | RO3G_14272.1 | RO3G_02588.1 | 186  | 109 | 81.65 |
| ##Scaffold_13 | Scaffold_2  | 1181444 | 1187667 | 2       | 307284  | 316977  | 1            | 3            |      |     |       |
|               | 1181444     | 1182692 | 307284  | 308280  | -1      | -1      | RO3G_14314.1 | RO3G_02335.1 | 343  | 300 | 62    |
|               | 1183213     | 1185778 | 308814  | 311450  | -1      | -1      | RO3G_14315.1 | RO3G_02336.1 | 927  | 811 | 63.26 |
|               | 1186894     | 1187667 | 316239  | 316977  | -1      | -1      | RO3G_14316.1 | RO3G_02338.1 | 394  | 192 | 100   |
| ##Scaffold_13 | Scaffold_6  | 502896  | 509705  | 6       | 1916606 | 1922587 | 1            | 3            |      |     |       |
|               | 502896      | 504383  | 1916606 | 1917925 | 1       | 1       | RO3G_14049.1 | RO3G_08757.1 | 412  | 449 | 53.67 |
|               | 504726      | 506688  | 1918295 | 1920542 | -1      | -1      | RO3G_14050.1 | RO3G_08758.1 | 608  | 594 | 56.9  |
|               | 508176      | 509705  | 1921163 | 1922587 | -1      | -1      | RO3G_14051.1 | RO3G_08759.1 | 649  | 409 | 82.89 |
| ##Scaffold_14 | Scaffold_4  | 831030  | 839224  | 4       | 83188   | 91387   | 1            | 3            |      |     |       |
|               | 831030      | 832154  | 83188   | 83927   | -1      | -1      | RO3G_14663.1 | RO3G_05554.1 | 309  | 229 | 69.87 |
|               | 834742      | 836461  | 87075   | 88827   | 1       | 1       | RO3G_14665.1 | RO3G_05555.1 | 630  | 553 | 70.89 |
|               | 836610      | 839224  | 89038   | 91387   | -1      | -1      | RO3G_14666.1 | RO3G_05556.1 | 741  | 671 | 59.91 |
| ##Scaffold_14 | Scaffold_6  | 357930  | 375162  | 6       | 2399857 | 2409943 | -1           | 3            |      |     |       |
|               | 374033      | 375162  | 2399857 | 2400995 | -1      | 1       | RO3G_14483.1 | RO3G_08936.1 | 642  | 317 | 96.85 |
|               | 365178      | 366589  | 2406783 | 2408188 | -1      | 1       | RO3G_14478.1 | RO3G_08940.1 | 795  | 435 | 95.86 |
|               | 357930      | 359547  | 2408713 | 2409943 | 1       | -1      | RO3G_14476.1 | RO3G_08941.1 | 338  | 325 | 54.15 |
| ##Scaffold_15 | Scaffold_4  | 869465  | 880759  | 4       | 1673661 | 1680776 | 1            | 3            |      |     |       |
|               | 869465      | 871449  | 1673661 | 1675564 | -1      | -1      | RO3G_15121.1 | RO3G_06113.1 | 462  | 586 | 48.81 |
|               | 876095      | 876726  | 1679229 | 1679767 | 1       | 1       | RO3G_15122.1 | RO3G_06117.1 | 147  | 121 | 66.12 |
|               | 880271      | 880759  | 1680331 | 1680776 | -1      | -1      | RO3G_15124.1 | RO3G_06118.1 | 210  | 113 | 89.38 |
| ##Scaffold_15 | Scaffold_6  | 794944  | 824904  | 6       | 49667   | 75799   | 1            | 7            |      |     |       |
|               | 794944      | 795784  | 49667   | 50470   | 1       | 1       | RO3G_15091.1 | RO3G_08000.1 | 258  | 166 | 95.78 |
|               | 796148      | 797733  | 50670   | 52247   | -1      | -1      | RO3G_15092.1 | RO3G_08001.1 | 542  | 396 | 77.53 |
|               | 807256      | 807904  | 58323   | 58986   | -1      | -1      | RO3G_15095.1 | RO3G_08003.1 | 300  | 146 | 98.63 |
|               | 810800      | 814260  | 59618   | 61789   | -1      | -1      | RO3G_15097.1 | RO3G_08004.1 | 369  | 486 | 45.88 |
|               | 818653      | 819508  | 66007   | 67073   | -1      | -1      | RO3G_15098.1 | RO3G_08006.1 | 124  | 135 | 47.41 |
|               | 820188      | 820857  | 67963   | 69054   | -1      | -1      | RO3G_15100.1 | RO3G_08007.1 | 235  | 168 | 70.24 |
|               | 822675      | 824904  | 73434   | 75799   | 1       | 1       | RO3G_15101.1 | RO3G_08009.1 | 748  | 690 | 61.16 |
| ##Scaffold_15 | Scaffold_6  | 1063985 | 1076231 | 6       | 136087  | 145311  | 1            | 3            |      |     |       |
|               | 1063985     | 1065205 | 136087  | 137209  | 1       | 1       | RO3G_15197.1 | RO3G_08033.1 | 538  | 327 | 84.4  |
|               | 1065520     | 1066497 | 139777  | 142178  | -1      | -1      | RO3G_15198.1 | RO3G_08035.1 | 336  | 235 | 78.3  |
|               | 1074433     | 1076231 | 144350  | 145311  | -1      | -1      | RO3G_15202.1 | RO3G_08037.1 | 412  | 249 | 85.14 |
| ##Scaffold_16 | Scaffold_12 | 752010  | 779865  | 12      | 1060783 | 1068451 | 1            | 3            |      |     |       |
|               | 752010      | 753567  | 1060783 | 1062320 | -1      | -1      | RO3G_15559.1 | RO3G_13691.1 | 819  | 463 | 96.76 |
|               | 753778      | 755058  | 1062657 | 1063472 | 1       | 1       | RO3G_15560.1 | RO3G_13692.1 | 307  | 236 | 64.83 |
|               | 778800      | 779865  | 1067983 | 1068451 | -1      | -1      | RO3G_15570.1 | RO3G_13694.1 | 189  | 92  | 94.57 |
| ##Scaffold_16 | Scaffold_21 | 270762  | 310599  | 21      | 60739   | 76616   | 1            | 3            |      |     |       |
|               | 270762      | 273116  | 60739   | 63091   | -1      | -1      | RO3G_15385.1 | RO3G_16583.1 | 1344 | 768 | 85.03 |
|               | 289462      | 292463  | 67664   | 69856   | -1      | -1      | RO3G_15392.1 | RO3G_16585.1 | 722  | 513 | 74.07 |
|               | 309842      | 310599  | 75959   | 76616   | -1      | -1      | RO3G_15398.1 | RO3G_16588.1 | 179  | 95  | 91.58 |
| ##Scaffold_16 | Scaffold_7  | 67254   | 79832   | 7       | 1818096 | 1833900 | -1           | 3            |      |     |       |
|               | 79058       | 79832   | 1818096 | 1818892 | -1      | 1       | RO3G_15303.1 | RO3G_09898.1 | 327  | 181 | 96.13 |
|               | 73424       | 74818   | 1821281 | 1822141 | 1       | -1      | RO3G_15299.1 | RO3G_09900.1 | 172  | 184 | 50    |
|               | 67254       | 68109   | 1832996 | 1833900 | -1      | 1       | RO3G_15294.1 | RO3G_09904.1 | 431  | 268 | 85.07 |
| ##Scaffold_16 | Scaffold_7  | 434523  | 446394  | 7       | 2594894 | 2621842 | -1           | 4            |      |     |       |
|               | 445524      | 446394  | 2594894 | 2595745 | 1       | -1      | RO3G_15452.1 | RO3G_10200.1 | 400  | 220 | 93.18 |
|               | 443523      | 445351  | 2603304 | 2604495 | -1      | 1       | RO3G_15451.1 | RO3G_10202.1 | 312  | 371 | 65.77 |

|               |              |         |         |    |         |              |              |      |      |       |
|---------------|--------------|---------|---------|----|---------|--------------|--------------|------|------|-------|
| 441913        | 443381       | 2605138 | 2606585 | 1  | -1      | RO3G_15450.1 | RO3G_10204.1 | 697  | 442  | 80.77 |
| 434523        | 435730       | 2620715 | 2621842 | 1  | -1      | RO3G_15447.1 | RO3G_10209.1 | 392  | 312  | 58.65 |
| ##Scaffold_17 | Scaffold_18  | 77211   | 86539   | 18 | 160292  | 169370       | 1            | 3    |      |       |
| 77211         | 78413        | 160292  | 162794  | 1  | 1       | RO3G_15610.1 | RO3G_15932.1 | 416  | 318  | 75.16 |
| 80176         | 82034        | 164164  | 166047  | -1 | -1      | RO3G_15613.1 | RO3G_15934.1 | 885  | 562  | 76.87 |
| 85567         | 86539        | 168590  | 169370  | -1 | -1      | RO3G_15615.1 | RO3G_15936.1 | 231  | 163  | 61.35 |
| ##Scaffold_17 | Scaffold_18  | 487645  | 524778  | 18 | 417045  | 447388       | -1           | 8    |      |       |
| 524316        | 524778       | 417045  | 417496  | -1 | 1       | RO3G_15777.1 | RO3G_16038.1 | 263  | 131  | 100   |
| 516877        | 517384       | 419871  | 420401  | -1 | 1       | RO3G_15775.1 | RO3G_16041.1 | 234  | 133  | 91.73 |
| 512751        | 513912       | 428951  | 429932  | 1  | -1      | RO3G_15773.1 | RO3G_16045.1 | 240  | 229  | 56.77 |
| 511676        | 512276       | 430288  | 431238  | 1  | -1      | RO3G_15772.1 | RO3G_16046.1 | 201  | 152  | 63.16 |
| 509109        | 509594       | 431583  | 432104  | 1  | -1      | RO3G_15770.1 | RO3G_16047.1 | 130  | 158  | 40.51 |
| 501097        | 502327       | 436624  | 437871  | -1 | 1       | RO3G_15767.1 | RO3G_16049.1 | 693  | 373  | 87.13 |
| 498688        | 500768       | 438234  | 440160  | 1  | -1      | RO3G_15766.1 | RO3G_16050.1 | 777  | 564  | 73.4  |
| 487645        | 490989       | 444055  | 447388  | 1  | -1      | RO3G_15763.1 | RO3G_16052.1 | 1323 | 981  | 68.71 |
| ##Scaffold_17 | Scaffold_2   | 411287  | 426135  | 2  | 4563272 | 4590613      | 1            | 4    |      |       |
| 411287        | 412658       | 4563272 | 4564620 | -1 | -1      | RO3G_15735.1 | RO3G_04008.1 | 672  | 412  | 81.31 |
| 415638        | 417005       | 4568948 | 4570365 | -1 | -1      | RO3G_15737.1 | RO3G_04010.1 | 436  | 297  | 77.44 |
| 421519        | 423961       | 4579354 | 4581531 | 1  | 1       | RO3G_15739.1 | RO3G_04015.1 | 1236 | 702  | 89.6  |
| 424775        | 426135       | 4589233 | 4590613 | 1  | 1       | RO3G_15740.1 | RO3G_04020.1 | 768  | 432  | 97.22 |
| ##Scaffold_17 | Scaffold_2   | 676907  | 702573  | 2  | 4423461 | 4462153      | 1            | 5    |      |       |
| 676907        | 686778       | 4423461 | 4433793 | 1  | 1       | RO3G_15840.1 | RO3G_03964.1 | 2857 | 2613 | 58.52 |
| 690198        | 691550       | 4438019 | 4439535 | 1  | 1       | RO3G_15843.1 | RO3G_03967.1 | 399  | 451  | 51.88 |
| 692954        | 694627       | 4440568 | 4442797 | 1  | 1       | RO3G_15845.1 | RO3G_03968.1 | 595  | 513  | 57.7  |
| 699752        | 700291       | 4457720 | 4458414 | -1 | -1      | RO3G_15848.1 | RO3G_03975.1 | 229  | 137  | 82.48 |
| 701488        | 702573       | 4461116 | 4462153 | 1  | 1       | RO3G_15849.1 | RO3G_03977.1 | 149  | 351  | 33.33 |
| ##Scaffold_17 | Scaffold_7   | 550793  | 574377  | 7  | 1179905 | 1197756      | -1           | 6    |      |       |
| 573253        | 574377       | 1179905 | 1180999 | 1  | -1      | RO3G_15797.1 | RO3G_09645.1 | 402  | 241  | 100   |
| 573382        | 573097       | 1181276 | 1181920 | 1  | -1      | RO3G_15796.1 | RO3G_09646.1 | 128  | 149  | 55.03 |
| 562193        | 563638       | 1185097 | 1187100 | -1 | 1       | RO3G_15792.1 | RO3G_09649.1 | 343  | 294  | 65.65 |
| 558764        | 561513       | 1187256 | 1190005 | 1  | -1      | RO3G_15791.1 | RO3G_09650.1 | 1667 | 843  | 100   |
| 557639        | 558541       | 1190228 | 1190977 | 1  | -1      | RO3G_15790.1 | RO3G_09651.1 | 390  | 250  | 90.4  |
| 550793        | 551422       | 1197121 | 1197756 | -1 | 1       | RO3G_15787.1 | RO3G_09653.1 | 362  | 192  | 97.92 |
| ##Scaffold_18 | Scaffold_17  | 160292  | 169370  | 17 | 77211   | 86539        | 1            | 3    |      |       |
| 160292        | 162794       | 77211   | 78413   | 1  | 1       | RO3G_15932.1 | RO3G_15610.1 | 416  | 318  | 75.16 |
| 164164        | 166047       | 80176   | 82034   | -1 | -1      | RO3G_15934.1 | RO3G_15613.1 | 885  | 562  | 76.87 |
| 168590        | 169370       | 85567   | 86539   | -1 | -1      | RO3G_15936.1 | RO3G_15615.1 | 231  | 163  | 61.35 |
| ##Scaffold_18 | Scaffold_17  | 416307  | 440160  | 17 | 498688  | 525515       | -1           | 8    |      |       |
| 438234        | 440160       | 498688  | 500768  | -1 | 1       | RO3G_16050.1 | RO3G_15766.1 | 777  | 564  | 73.4  |
| 436624        | 437871       | 501097  | 502327  | 1  | -1      | RO3G_16049.1 | RO3G_15767.1 | 693  | 373  | 87.13 |
| 431583        | 432104       | 509109  | 509594  | -1 | 1       | RO3G_16047.1 | RO3G_15770.1 | 130  | 158  | 40.51 |
| 430288        | 431238       | 511676  | 512276  | -1 | 1       | RO3G_16046.1 | RO3G_15772.1 | 201  | 152  | 63.16 |
| 428951        | 429932       | 512751  | 513912  | -1 | 1       | RO3G_16045.1 | RO3G_15773.1 | 240  | 229  | 56.77 |
| 419871        | 420401       | 516877  | 517384  | 1  | -1      | RO3G_16041.1 | RO3G_15775.1 | 234  | 133  | 91.73 |
| 417045        | 417496       | 524316  | 524778  | 1  | -1      | RO3G_16038.1 | RO3G_15777.1 | 263  | 131  | 100   |
| 416307        | 416549       | 525280  | 525515  | -1 | 1       | RO3G_16037.1 | RO3G_15778.1 | 102  | 45   | 100   |
| ##Scaffold_18 | Scaffold_4   | 317169  | 329021  | 4  | 2037373 | 2044821      | 1            | 4    |      |       |
| 317169        | 317942       | 2037373 | 2038148 | 1  | 1       | RO3G_15996.1 | RO3G_06245.1 | 416  | 211  | 99.53 |
| 319599        | 320748       | 2041940 | 2042879 | -1 | -1      | RO3G_15998.1 | RO3G_06248.1 | 290  | 149  | 96.64 |
| 322370        | 323696       | 2043092 | 2044120 | 1  | 1       | RO3G_15999.1 | RO3G_06249.1 | 207  | 281  | 47.69 |
| 328425        | 329021       | 2044204 | 2044821 | -1 | -1      | RO3G_16001.1 | RO3G_06250.1 | 171  | 138  | 57.97 |
| ##Scaffold_18 | Scaffold_4   | 518040  | 535479  | 4  | 1939885 | 1957699      | -1           | 5    |      |       |
| 534063        | 535479       | 1939885 | 1940415 | 1  | -1      | RO3G_16087.1 | RO3G_06215.1 | 183  | 176  | 53.98 |
| 523622        | 524556       | 1944715 | 1945661 | 1  | -1      | RO3G_16083.1 | RO3G_06217.1 | 408  | 230  | 89.13 |
| 521551        | 522709       | 1950113 | 1951221 | -1 | 1       | RO3G_16081.1 | RO3G_06220.1 | 140  | 294  | 35.71 |
| 520221        | 521333       | 1951527 | 1952623 | -1 | 1       | RO3G_16080.1 | RO3G_06221.1 | 398  | 260  | 92.31 |
| 518040        | 518567       | 1956857 | 1957699 | 1  | -1      | RO3G_16079.1 | RO3G_06223.1 | 270  | 175  | 77.14 |
| ##Scaffold_18 | Scaffold_8   | 273379  | 292995  | 8  | 319361  | 341149       | -1           | 3    |      |       |
| 290919        | 292995       | 319361  | 322163  | -1 | 1       | RO3G_15987.1 | RO3G_10355.1 | 856  | 535  | 82.24 |
| 274725        | 275378       | 338202  | 338714  | -1 | 1       | RO3G_15979.1 | RO3G_10362.1 | 221  | 172  | 70.35 |
| 273379        | 274464       | 339389  | 341149  | 1  | -1      | RO3G_15978.1 | RO3G_10363.1 | 662  | 345  | 91.59 |
| ##Scaffold_19 | 1Scaffold_19 | 237962  | 246785  | 1  | 1347735 | 1359260      | -1           | 3    |      |       |
| 245057        | 246785       | 1347735 | 1349468 | -1 | 1       | RO3G_16215.1 | RO3G_00533.1 | 876  | 458  | 97.6  |
| 239215        | 242170       | 1349741 | 1352787 | -1 | 1       | RO3G_16214.1 | RO3G_00534.1 | 1506 | 938  | 79.42 |
| 237962        | 239061       | 1358172 | 1359260 | 1  | -1      | RO3G_16213.1 | RO3G_00537.1 | 369  | 273  | 69.6  |
| ##Scaffold_19 | 1Scaffold_19 | 150947  | 160018  | 1  | 2475188 | 2485463      | -1           | 4    |      |       |
| 157429        | 160018       | 2475188 | 2476387 | -1 | 1       | RO3G_16180.1 | RO3G_00978.1 | 332  | 375  | 58.4  |

|               |             |         |         |    |         |              |              |      |      |       |
|---------------|-------------|---------|---------|----|---------|--------------|--------------|------|------|-------|
| 155903        | 156742      | 2477159 | 2479279 | -1 | 1       | RO3G_16179.1 | RO3G_00979.1 | 297  | 210  | 72.38 |
| 154590        | 155123      | 2479301 | 2479793 | 1  | -1      | RO3G_16178.1 | RO3G_00980.1 | 133  | 165  | 63.64 |
| 150947        | 152996      | 2483746 | 2485463 | 1  | -1      | RO3G_16177.1 | RO3G_00983.1 | 229  | 240  | 57.08 |
| ##Scaffold_19 | Scaffold_1  | 169955  | 183434  | 1  | 2587587 | 2611792      | -1           | 4    |      |       |
| 182690        | 183434      | 2587587 | 2588491 | -1 | 1       | RO3G_16189.1 | RO3G_01022.1 | 139  | 210  | 47.62 |
| 180637        | 181650      | 2589972 | 2590631 | 1  | -1      | RO3G_16188.1 | RO3G_01024.1 | 157  | 173  | 66.47 |
| 179473        | 180287      | 2591063 | 2591886 | 1  | -1      | RO3G_16187.1 | RO3G_01025.1 | 119  | 73   | 82.19 |
| 169955        | 174990      | 2608354 | 2611792 | 1  | -1      | RO3G_16184.1 | RO3G_01031.1 | 1313 | 998  | 72.85 |
| ##Scaffold_19 | Scaffold_1  | 101574  | 129254  | 1  | 3482785 | 3512047      | -1           | 4    |      |       |
| 117402        | 129254      | 3482785 | 3484068 | -1 | 1       | RO3G_16171.1 | RO3G_01332.1 | 796  | 427  | 98.59 |
| 115207        | 116988      | 3487398 | 3489073 | 1  | -1      | RO3G_16170.1 | RO3G_01334.1 | 665  | 373  | 82.84 |
| 104727        | 105591      | 3507656 | 3508159 | -1 | 1       | RO3G_16167.1 | RO3G_01342.1 | 290  | 167  | 85.03 |
| 101574        | 104556      | 3509424 | 3512047 | 1  | -1      | RO3G_16166.1 | RO3G_01343.1 | 1098 | 756  | 78.97 |
| ##Scaffold_19 | Scaffold_1  | 145786  | 291783  | 1  | 4132265 | 4163483      | 1            | 3    |      |       |
| 145786        | 147878      | 4132265 | 4136270 | -1 | -1      | RO3G_16175.1 | RO3G_01597.1 | 665  | 619  | 64.46 |
| 290348        | 291783      | 4144790 | 4146196 | 1  | 1       | RO3G_16238.1 | RO3G_01601.1 | 192  | 390  | 39.23 |
| 216238        | 217066      | 4162847 | 4163483 | 1  | 1       | RO3G_16202.1 | RO3G_01608.1 | 332  | 189  | 82.54 |
| ##Scaffold_19 | Scaffold_10 | 443679  | 512628  | 10 | 213997  | 219958       | 1            | 3    |      |       |
| 443679        | 444917      | 213997  | 215066  | 1  | 1       | RO3G_16296.1 | RO3G_12037.1 | 270  | 261  | 81.61 |
| 448167        | 448842      | 217292  | 217724  | 1  | 1       | RO3G_16298.1 | RO3G_12039.1 | 184  | 122  | 82.79 |
| 511843        | 512628      | 219169  | 219958  | -1 | -1      | RO3G_16321.1 | RO3G_12040.1 | 364  | 209  | 83.25 |
| ##Scaffold_19 | Scaffold_2  | 323073  | 334511  | 2  | 3741192 | 3751537      | -1           | 3    |      |       |
| 333140        | 334511      | 3741192 | 3742604 | 1  | -1      | RO3G_16253.1 | RO3G_03698.1 | 704  | 417  | 83.45 |
| 328440        | 329703      | 3745360 | 3746638 | -1 | 1       | RO3G_16251.1 | RO3G_03700.1 | 407  | 399  | 55.14 |
| 323073        | 327373      | 3747181 | 3751537 | -1 | 1       | RO3G_16249.1 | RO3G_03701.1 | 1984 | 1275 | 81.41 |
| ##Scaffold_19 | Scaffold_2  | 393268  | 400900  | 2  | 3722926 | 3729285      | 1            | 3    |      |       |
| 393268        | 394781      | 3722926 | 3724762 | -1 | -1      | RO3G_16279.1 | RO3G_03690.1 | 592  | 450  | 68.89 |
| 395579        | 397028      | 3725591 | 3726793 | -1 | -1      | RO3G_16280.1 | RO3G_03691.1 | 486  | 395  | 61.52 |
| 399432        | 400900      | 3728203 | 3729285 | 1  | 1       | RO3G_16281.1 | RO3G_03693.1 | 518  | 360  | 72.22 |
| ##Scaffold_2  | Scaffold_10 | 650185  | 656949  | 10 | 853442  | 861327       | 1            | 3    |      |       |
| 650185        | 651794      | 853442  | 855061  | -1 | -1      | RO3G_02460.1 | RO3G_12286.1 | 904  | 502  | 91.63 |
| 652381        | 655406      | 855373  | 858361  | -1 | -1      | RO3G_02461.1 | RO3G_12287.1 | 988  | 806  | 65.01 |
| 656433        | 656949      | 860803  | 861327  | -1 | -1      | RO3G_02462.1 | RO3G_12289.1 | 309  | 154  | 99.35 |
| ##Scaffold_2  | Scaffold_11 | 3312999 | 3317753 | 11 | 1319791 | 1326508      | 1            | 3    |      |       |
| 3312999       | 3314956     | 1319791 | 1321792 | 1  | 1       | RO3G_03536.1 | RO3G_13175.1 | 1102 | 626  | 88.02 |
| 3315374       | 3316657     | 1325085 | 1325680 | 1  | 1       | RO3G_03537.1 | RO3G_13177.1 | 193  | 101  | 86.14 |
| 3317204       | 3317753     | 1326012 | 1326508 | 1  | 1       | RO3G_03538.1 | RO3G_13178.1 | 283  | 147  | 96.6  |
| ##Scaffold_2  | Scaffold_13 | 127370  | 137055  | 13 | 702376  | 707130       | 1            | 3    |      |       |
| 127370        | 128699      | 702376  | 703115  | -1 | -1      | RO3G_02268.1 | RO3G_14129.1 | 193  | 192  | 52.08 |
| 134786        | 135262      | 705623  | 706087  | -1 | -1      | RO3G_02272.1 | RO3G_14131.1 | 182  | 159  | 69.81 |
| 136198        | 137055      | 706662  | 707130  | -1 | -1      | RO3G_02273.1 | RO3G_14132.1 | 168  | 106  | 73.58 |
| ##Scaffold_2  | Scaffold_13 | 307284  | 316977  | 13 | 1181444 | 1187667      | 1            | 3    |      |       |
| 307284        | 308280      | 1181444 | 1182692 | -1 | -1      | RO3G_02335.1 | RO3G_14314.1 | 343  | 300  | 62    |
| 308814        | 311450      | 1183213 | 1185778 | -1 | -1      | RO3G_02336.1 | RO3G_14315.1 | 927  | 811  | 63.26 |
| 316239        | 316977      | 1186894 | 1187667 | -1 | -1      | RO3G_02338.1 | RO3G_14316.1 | 394  | 192  | 100   |
| ##Scaffold_2  | Scaffold_13 | 383892  | 414392  | 13 | 261856  | 287461       | 1            | 7    |      |       |
| 383892        | 384846      | 261856  | 263303  | -1 | -1      | RO3G_02363.1 | RO3G_13946.1 | 457  | 242  | 97.11 |
| 396963        | 399220      | 266466  | 268547  | 1  | 1       | RO3G_02368.1 | RO3G_13948.1 | 409  | 636  | 42.45 |
| 400906        | 401273      | 268962  | 269339  | 1  | 1       | RO3G_02369.1 | RO3G_13949.1 | 189  | 106  | 83.02 |
| 401607        | 402046      | 269551  | 270911  | 1  | 1       | RO3G_02370.1 | RO3G_13950.1 | 116  | 93   | 73.12 |
| 402819        | 404638      | 271109  | 273334  | -1 | -1      | RO3G_02371.1 | RO3G_13951.1 | 672  | 501  | 72.85 |
| 406190        | 409908      | 278964  | 283340  | -1 | -1      | RO3G_02372.1 | RO3G_13953.1 | 1279 | 921  | 74.27 |
| 413976        | 414392      | 287065  | 287461  | -1 | -1      | RO3G_02374.1 | RO3G_13955.1 | 114  | 80   | 95    |
| ##Scaffold_2  | Scaffold_13 | 595920  | 605377  | 13 | 1086083 | 1099872      | 1            | 3    |      |       |
| 595920        | 597442      | 1086083 | 1088146 | -1 | -1      | RO3G_02439.1 | RO3G_14281.1 | 110  | 206  | 32.52 |
| 599997        | 603267      | 1092537 | 1095309 | 1  | 1       | RO3G_02440.1 | RO3G_14283.1 | 907  | 742  | 66.85 |
| 603498        | 605377      | 1099053 | 1099872 | -1 | -1      | RO3G_02441.1 | RO3G_14285.1 | 147  | 142  | 55.63 |
| ##Scaffold_2  | Scaffold_13 | 916178  | 948158  | 13 | 1037443 | 1064434      | 1            | 8    |      |       |
| 916178        | 917068      | 1037443 | 1038447 | 1  | 1       | RO3G_02572.1 | RO3G_14263.1 | 207  | 162  | 69.14 |
| 919271        | 920101      | 1040414 | 1041202 | 1  | 1       | RO3G_02574.1 | RO3G_14264.1 | 199  | 246  | 44.31 |
| 921543        | 922288      | 1044156 | 1044915 | 1  | 1       | RO3G_02576.1 | RO3G_14265.1 | 336  | 181  | 99.45 |
| 931037        | 931730      | 1045895 | 1047799 | -1 | -1      | RO3G_02581.1 | RO3G_14266.1 | 279  | 189  | 71.96 |
| 936831        | 938150      | 1050505 | 1051980 | 1  | 1       | RO3G_02582.1 | RO3G_14267.1 | 379  | 377  | 54.11 |
| 938733        | 939756      | 1054827 | 1055321 | -1 | -1      | RO3G_02583.1 | RO3G_14268.1 | 171  | 163  | 63.8  |
| 944465        | 945928      | 1060011 | 1061489 | -1 | -1      | RO3G_02587.1 | RO3G_14271.1 | 723  | 473  | 76.74 |



|              |             |         |         |    |         |              |              |      |      |       |
|--------------|-------------|---------|---------|----|---------|--------------|--------------|------|------|-------|
| 947654       | 948158      | 1062479 | 1064434 | 1  | 1       | RO3G_02588.1 | RO3G_14272.1 | 186  | 109  | 81.65 |
| ##Scaffold_2 | Scaffold_17 | 4423461 | 4462153 | 17 | 676907  | 702573       |              | 1    | 5    |       |
| 4423461      | 4433793     | 676907  | 686778  | 1  | 1       | RO3G_03964.1 | RO3G_15840.1 | 2857 | 2613 | 58.52 |
| 4438019      | 4439535     | 690198  | 691550  | 1  | 1       | RO3G_03967.1 | RO3G_15843.1 | 399  | 451  | 51.88 |
| 4440568      | 4442797     | 692954  | 694627  | 1  | 1       | RO3G_03968.1 | RO3G_15845.1 | 595  | 513  | 57.7  |
| 4457720      | 4458414     | 699752  | 700291  | -1 | -1      | RO3G_03975.1 | RO3G_15848.1 | 229  | 137  | 82.48 |
| 4461116      | 4462153     | 701488  | 702573  | 1  | 1       | RO3G_03977.1 | RO3G_15849.1 | 149  | 351  | 33.33 |
| ##Scaffold_2 | Scaffold_17 | 4563272 | 4590613 | 17 | 411287  | 426135       |              | 1    | 4    |       |
| 4563272      | 4564620     | 411287  | 412658  | -1 | -1      | RO3G_04008.1 | RO3G_15735.1 | 672  | 412  | 81.31 |
| 4568948      | 4570365     | 415638  | 417005  | -1 | -1      | RO3G_04010.1 | RO3G_15737.1 | 436  | 297  | 77.44 |
| 4579354      | 4581531     | 421519  | 423961  | 1  | 1       | RO3G_04015.1 | RO3G_15739.1 | 1236 | 702  | 89.6  |
| 4589233      | 4590613     | 424775  | 426135  | 1  | 1       | RO3G_04020.1 | RO3G_15740.1 | 768  | 432  | 97.22 |
| ##Scaffold_2 | Scaffold_19 | 3737037 | 3746638 | 19 | 328440  | 339967       |              | -1   | 3    |       |
| 3745360      | 3746638     | 328440  | 329703  | 1  | -1      | RO3G_03700.1 | RO3G_16251.1 | 407  | 399  | 55.14 |
| 3741192      | 3742604     | 333140  | 334511  | -1 | 1       | RO3G_03698.1 | RO3G_16253.1 | 704  | 417  | 83.45 |
| 3737037      | 3740867     | 336054  | 339967  | 1  | -1      | RO3G_03697.1 | RO3G_16255.1 | 1794 | 1055 | 88.63 |
| ##Scaffold_2 | Scaffold_19 | 3722926 | 3729285 | 19 | 393268  | 400900       |              | 1    | 3    |       |
| 3722926      | 3724762     | 393268  | 394781  | -1 | -1      | RO3G_03690.1 | RO3G_16279.1 | 592  | 450  | 68.89 |
| 3725591      | 3726793     | 395579  | 397028  | -1 | -1      | RO3G_03691.1 | RO3G_16280.1 | 486  | 395  | 61.52 |
| 3728203      | 3729285     | 399432  | 400900  | 1  | 1       | RO3G_03693.1 | RO3G_16281.1 | 518  | 360  | 72.22 |
| ##Scaffold_2 | Scaffold_4  | 4960914 | 4971340 | 4  | 968018  | 976308       |              | -1   | 3    |       |
| 4969965      | 4971340     | 968018  | 968855  | -1 | 1       | RO3G_04164.1 | RO3G_05872.1 | 346  | 236  | 71.19 |
| 4966411      | 4967519     | 973385  | 975018  | -1 | 1       | RO3G_04162.1 | RO3G_05875.1 | 471  | 305  | 89.51 |
| 4960914      | 4961607     | 975610  | 976308  | 1  | -1      | RO3G_04159.1 | RO3G_05876.1 | 270  | 150  | 96.67 |
| ##Scaffold_2 | Scaffold_7  | 4745194 | 4755888 | 7  | 1579272 | 1589905      |              | 1    | 4    |       |
| 4745194      | 4748425     | 1579272 | 1582504 | -1 | -1      | RO3G_04076.1 | RO3G_09793.1 | 1281 | 836  | 80.5  |
| 4750392      | 4751310     | 1582997 | 1583916 | 1  | 1       | RO3G_04077.1 | RO3G_09794.1 | 485  | 268  | 86.94 |
| 4753157      | 4753915     | 1584589 | 1586505 | 1  | 1       | RO3G_04078.1 | RO3G_09795.1 | 404  | 247  | 80.16 |
| 4754622      | 4755888     | 1588627 | 1589905 | -1 | -1      | RO3G_04079.1 | RO3G_09797.1 | 757  | 388  | 91.49 |
| ##Scaffold_2 | Scaffold_8  | 2117189 | 2135611 | 8  | 987413  | 999965       |              | 1    | 3    |       |
| 2130574      | 2131077     | 987413  | 987919  | 1  | 1       | RO3G_03044.1 | RO3G_10592.1 | 219  | 168  | 67.26 |
| 2134936      | 2135611     | 989674  | 990263  | -1 | -1      | RO3G_03047.1 | RO3G_10593.1 | 166  | 195  | 53.33 |
| 2117189      | 2118668     | 998449  | 999965  | 1  | 1       | RO3G_03038.1 | RO3G_10597.1 | 588  | 371  | 76.28 |
| ##Scaffold_2 | Scaffold_8  | 2047323 | 2110144 | 8  | 1083214 | 1112456      |              | 1    | 7    |       |
| 2104655      | 2107445     | 1083214 | 1084378 | 1  | 1       | RO3G_03032.1 | RO3G_10618.1 | 384  | 406  | 59.11 |
| 2107483      | 2108428     | 1085112 | 1085893 | -1 | -1      | RO3G_03033.1 | RO3G_10619.1 | 315  | 190  | 85.26 |
| 2108740      | 2110144     | 1086016 | 1088365 | -1 | -1      | RO3G_03034.1 | RO3G_10620.1 | 653  | 403  | 79.9  |
| 2047323      | 2048629     | 1095078 | 1096337 | -1 | -1      | RO3G_03009.1 | RO3G_10624.1 | 624  | 385  | 79.74 |
| 2050725      | 2051884     | 1100145 | 1101283 | 1  | 1       | RO3G_03011.1 | RO3G_10625.1 | 380  | 347  | 71.76 |
| 2056112      | 2058511     | 1105497 | 1108957 | -1 | -1      | RO3G_03013.1 | RO3G_10627.1 | 659  | 867  | 50.75 |
| 2065297      | 2066473     | 1111005 | 1112456 | 1  | 1       | RO3G_03017.1 | RO3G_10629.1 | 137  | 323  | 33.13 |
| ##Scaffold_2 | Scaffold_8  | 2484375 | 2489033 | 8  | 1147362 | 1151616      |              | -1   | 3    |       |
| 2487753      | 2489033     | 1147362 | 1148644 | -1 | 1       | RO3G_03192.1 | RO3G_10646.1 | 493  | 409  | 80.93 |
| 2486017      | 2487542     | 1149051 | 1150210 | 1  | -1      | RO3G_03191.1 | RO3G_10647.1 | 578  | 314  | 93.63 |
| 2484375      | 2485570     | 1150397 | 1151616 | -1 | 1       | RO3G_03190.1 | RO3G_10648.1 | 462  | 284  | 93.31 |
| ##Scaffold_2 | Scaffold_8  | 4540444 | 4551445 | 8  | 705107  | 712714       |              | 1    | 3    |       |
| 4540444      | 4541082     | 705107  | 705734  | -1 | -1      | RO3G_04000.1 | RO3G_10491.1 | 365  | 191  | 99.48 |
| 4547685      | 4548535     | 709779  | 710185  | 1  | 1       | RO3G_04002.1 | RO3G_10493.1 | 128  | 121  | 59.5  |
| 4548933      | 4551445     | 711103  | 712714  | 1  | 1       | RO3G_04003.1 | RO3G_10494.1 | 189  | 170  | 57.65 |
| ##Scaffold_2 | Scaffold_9  | 1044713 | 1072209 | 9  | 1553436 | 1580121      |              | 1    | 3    |       |
| 1044713      | 1046360     | 1553436 | 1555542 | -1 | -1      | RO3G_02628.1 | RO3G_11676.1 | 489  | 433  | 59.12 |
| 1052387      | 1053606     | 1561774 | 1564047 | -1 | -1      | RO3G_02631.1 | RO3G_11678.1 | 346  | 262  | 65.65 |
| 1070753      | 1072209     | 1578675 | 1580121 | -1 | -1      | RO3G_02639.1 | RO3G_11684.1 | 630  | 378  | 81.22 |
| ##Scaffold_2 | Scaffold_9  | 1091132 | 1104633 | 9  | 1629355 | 1650133      |              | 1    | 3    |       |
| 1091132      | 1094874     | 1629355 | 1633760 | 1  | 1       | RO3G_02645.1 | RO3G_11701.1 | 845  | 637  | 69.86 |
| 1100227      | 1101585     | 1642598 | 1643959 | 1  | 1       | RO3G_02649.1 | RO3G_11703.1 | 780  | 412  | 96.84 |
| 1102144      | 1104633     | 1647678 | 1650133 | 1  | 1       | RO3G_02650.1 | RO3G_11706.1 | 928  | 668  | 68.41 |
| ##Scaffold_2 | Scaffold_9  | 1312519 | 1349373 | 9  | 1068482 | 1105756      |              | 1    | 7    |       |
| 1312519      | 1314406     | 1068482 | 1070398 | 1  | 1       | RO3G_02730.1 | RO3G_11488.1 | 796  | 497  | 78.07 |
| 1314824      | 1318560     | 1070869 | 1074757 | -1 | -1      | RO3G_02731.1 | RO3G_11489.1 | 1204 | 1057 | 68.78 |
| 1320574      | 1322356     | 1079139 | 1080890 | 1  | 1       | RO3G_02733.1 | RO3G_11492.1 | 401  | 513  | 43.27 |
| 1323684      | 1326296     | 1089509 | 1090698 | 1  | 1       | RO3G_02735.1 | RO3G_11494.1 | 566  | 298  | 99.66 |
| 1327681      | 1330056     | 1092360 | 1094721 | -1 | -1      | RO3G_02737.1 | RO3G_11496.1 | 1203 | 771  | 83.53 |
| 1339712      | 1340081     | 1096771 | 1097133 | 1  | 1       | RO3G_02740.1 | RO3G_11497.1 | 200  | 99   | 96.97 |
| 1348339      | 1349373     | 1105154 | 1105756 | -1 | -1      | RO3G_02743.1 | RO3G_11500.1 | 234  | 194  | 55.67 |

|               |             |         |         |    |         |              |              |      |      |       |  |
|---------------|-------------|---------|---------|----|---------|--------------|--------------|------|------|-------|--|
| ##Scaffold_2  | Scaffold_9  | 1450893 | 1471461 | 9  | 947923  | 960644       | 1            | 4    |      |       |  |
| 1450893       | 1452411     | 947923  | 949409  | 1  | 1       | RO3G_02786.1 | RO3G_11439.1 | 704  | 472  | 73.52 |  |
| 1456930       | 1458009     | 950998  | 952018  | 1  | 1       | RO3G_02789.1 | RO3G_11441.1 | 269  | 206  | 69.9  |  |
| 1467356       | 1468496     | 953644  | 954771  | -1 | -1      | RO3G_02794.1 | RO3G_11443.1 | 590  | 340  | 84.12 |  |
| 1469358       | 1471461     | 959092  | 960644  | -1 | -1      | RO3G_02795.1 | RO3G_11445.1 | 723  | 398  | 94.22 |  |
| ##Scaffold_2  | Scaffold_9  | 1505807 | 1515521 | 9  | 1493379 | 1504471      | 1            | 3    |      |       |  |
| 1505807       | 1510416     | 1493379 | 1497629 | -1 | -1      | RO3G_02810.1 | RO3G_11651.1 | 1299 | 1168 | 65.41 |  |
| 1511284       | 1513230     | 1498598 | 1500973 | -1 | -1      | RO3G_02811.1 | RO3G_11652.1 | 817  | 658  | 73.56 |  |
| 1514433       | 1515521     | 1503407 | 1504471 | 1  | 1       | RO3G_02812.1 | RO3G_11653.1 | 446  | 292  | 73.97 |  |
| ##Scaffold_2  | Scaffold_9  | 1794551 | 1805114 | 9  | 1338628 | 1352465      | 1            | 4    |      |       |  |
| 1794551       | 1794901     | 1338628 | 1339020 | -1 | -1      | RO3G_02913.1 | RO3G_11593.1 | 155  | 124  | 69.35 |  |
| 1796110       | 1797180     | 1343750 | 1344831 | 1  | 1       | RO3G_02914.1 | RO3G_11596.1 | 562  | 322  | 86.96 |  |
| 1798502       | 1801178     | 1345680 | 1348345 | -1 | -1      | RO3G_02915.1 | RO3G_11597.1 | 1009 | 748  | 73.53 |  |
| 1803770       | 1805114     | 1350959 | 1352465 | -1 | -1      | RO3G_02916.1 | RO3G_11598.1 | 97.1 | 102  | 48.04 |  |
| ##Scaffold_2  | Scaffold_9  | 1733597 | 1767308 | 9  | 1691613 | 1713832      | 1            | 5    |      |       |  |
| 1733597       | 1737215     | 1691613 | 1694302 | -1 | -1      | RO3G_02895.1 | RO3G_11725.1 | 1144 | 823  | 74    |  |
| 1747510       | 1749054     | 1697511 | 1699271 | -1 | -1      | RO3G_02898.1 | RO3G_11728.1 | 520  | 360  | 76.39 |  |
| 1754198       | 1755912     | 1701007 | 1701804 | -1 | -1      | RO3G_02899.1 | RO3G_11729.1 | 283  | 248  | 63.71 |  |
| 1759268       | 1760651     | 1705933 | 1707249 | -1 | -1      | RO3G_02901.1 | RO3G_11731.1 | 342  | 275  | 58.91 |  |
| 1765914       | 1767308     | 1710465 | 1713832 | 1  | 1       | RO3G_02903.1 | RO3G_11732.1 | 633  | 496  | 70.56 |  |
| ##Scaffold_20 | Scaffold_6  | 103035  | 136510  | 6  | 700869  | 729100       | -1           | 7    |      |       |  |
| 135696        | 136510      | 700869  | 701742  | -1 | 1       | RO3G_16411.1 | RO3G_08253.1 | 281  | 263  | 69.58 |  |
| 133426        | 134692      | 706380  | 707642  | -1 | 1       | RO3G_16410.1 | RO3G_08255.1 | 703  | 383  | 89.3  |  |
| 117450        | 118175      | 712898  | 714374  | -1 | 1       | RO3G_16403.1 | RO3G_08257.1 | 393  | 198  | 95.96 |  |
| 113910        | 114352      | 715288  | 715727  | -1 | 1       | RO3G_16401.1 | RO3G_08258.1 | 119  | 108  | 96.3  |  |
| 107283        | 108021      | 721416  | 722149  | 1  | -1      | RO3G_16397.1 | RO3G_08261.1 | 292  | 163  | 93.25 |  |
| 105145        | 106833      | 725182  | 726870  | -1 | 1       | RO3G_16396.1 | RO3G_08262.1 | 949  | 501  | 99.6  |  |
| 103035        | 104755      | 727392  | 729100  | -1 | 1       | RO3G_16395.1 | RO3G_08263.1 | 723  | 467  | 71.73 |  |
| ##Scaffold_20 | Scaffold_6  | 191612  | 206009  | 6  | 675360  | 689896       | -1           | 4    |      |       |  |
| 204120        | 206009      | 675360  | 676376  | -1 | 1       | RO3G_16439.1 | RO3G_08241.1 | 213  | 154  | 85.71 |  |
| 202056        | 203600      | 676705  | 677720  | 1  | -1      | RO3G_16438.1 | RO3G_08242.1 | 409  | 245  | 80.82 |  |
| 198253        | 199127      | 684246  | 685109  | 1  | -1      | RO3G_16436.1 | RO3G_08245.1 | 262  | 195  | 76.92 |  |
| 191612        | 192786      | 688733  | 689896  | 1  | -1      | RO3G_16433.1 | RO3G_08247.1 | 471  | 255  | 95.69 |  |
| ##Scaffold_20 | Scaffold_6  | 254783  | 313526  | 6  | 602444  | 614096       | 1            | 3    |      |       |  |
| 311843        | 313526      | 602444  | 603986  | -1 | -1      | RO3G_16488.1 | RO3G_08204.1 | 644  | 420  | 74.05 |  |
| 276665        | 277336      | 606140  | 606936  | 1  | 1       | RO3G_16473.1 | RO3G_08205.1 | 407  | 221  | 90.05 |  |
| 254783        | 256201      | 612705  | 614096  | 1  | 1       | RO3G_16463.1 | RO3G_08208.1 | 649  | 402  | 78.86 |  |
| ##Scaffold_21 | Scaffold_16 | 60739   | 76616   | 16 | 270762  | 310599       | 1            | 3    |      |       |  |
| 60739         | 63091       | 270762  | 273116  | -1 | -1      | RO3G_16583.1 | RO3G_15385.1 | 1344 | 768  | 85.03 |  |
| 67664         | 69856       | 289462  | 292463  | -1 | -1      | RO3G_16585.1 | RO3G_15392.1 | 722  | 513  | 74.07 |  |
| 75959         | 76616       | 309842  | 310599  | -1 | -1      | RO3G_16588.1 | RO3G_15398.1 | 179  | 95   | 91.58 |  |
| ##Scaffold_21 | Scaffold_21 | 103863  | 111881  | 21 | 118413  | 126431       | -1           | 3    |      |       |  |
| 110491        | 111881      | 118413  | 119803  | -1 | 1       | RO3G_16604.1 | RO3G_16608.1 | 697  | 389  | 100   |  |
| 107232        | 107714      | 122580  | 123062  | -1 | 1       | RO3G_16602.1 | RO3G_16610.1 | 336  | 160  | 100   |  |
| 103863        | 104423      | 125871  | 126431  | 1  | -1      | RO3G_16601.1 | RO3G_16611.1 | 351  | 186  | 100   |  |
| ##Scaffold_24 | Scaffold_3  | 43683   | 51269   | 3  | 1872937 | 1887741      | -1           | 3    |      |       |  |
| 49502         | 51269       | 1872937 | 1874731 | 1  | -1      | RO3G_16941.1 | RO3G_04913.1 | 969  | 512  | 94.92 |  |
| 46532         | 48841       | 1882543 | 1884852 | 1  | -1      | RO3G_16940.1 | RO3G_04919.1 | 1425 | 769  | 97.53 |  |
| 43683         | 45789       | 1885522 | 1887741 | 1  | -1      | RO3G_16939.1 | RO3G_04920.1 | 468  | 593  | 43.17 |  |
| ##Scaffold_24 | Scaffold_3  | 76984   | 82209   | 3  | 1846411 | 1853447      | -1           | 3    |      |       |  |
| 80180         | 82209       | 1846411 | 1848217 | 1  | -1      | RO3G_16954.1 | RO3G_04903.1 | 717  | 492  | 74.39 |  |
| 78736         | 79483       | 1850836 | 1851624 | 1  | -1      | RO3G_16953.1 | RO3G_04904.1 | 209  | 156  | 67.95 |  |
| 76984         | 78443       | 1852515 | 1853447 | -1 | 1       | RO3G_16952.1 | RO3G_04905.1 | 300  | 320  | 63.44 |  |
| ##Scaffold_24 | Scaffold_6  | 175747  | 214194  | 6  | 2626427 | 2677335      | -1           | 9    |      |       |  |
| 213247        | 214194      | 2626427 | 2627000 | 1  | -1      | RO3G_17002.1 | RO3G_09016.1 | 174  | 138  | 57.25 |  |
| 197028        | 202786      | 2641179 | 2646492 | -1 | 1       | RO3G_16999.1 | RO3G_09020.1 | 887  | 1510 | 41.99 |  |
| 194278        | 196446      | 2649300 | 2650923 | -1 | 1       | RO3G_16998.1 | RO3G_09022.1 | 471  | 372  | 65.59 |  |
| 192743        | 193672      | 2651250 | 2652179 | 1  | -1      | RO3G_16997.1 | RO3G_09023.1 | 476  | 309  | 99.03 |  |
| 190476        | 190780      | 2656466 | 2656765 | 1  | -1      | RO3G_16996.1 | RO3G_09025.1 | 150  | 82   | 90.24 |  |
| 186161        | 188668      | 2658432 | 2660888 | -1 | 1       | RO3G_16995.1 | RO3G_09026.1 | 1105 | 702  | 75.07 |  |
| 182117        | 185302      | 2664468 | 2667379 | -1 | 1       | RO3G_16994.1 | RO3G_09028.1 | 722  | 450  | 80.67 |  |
| 178834        | 181803      | 2667679 | 2670621 | -1 | 1       | RO3G_16993.1 | RO3G_09029.1 | 695  | 629  | 65.98 |  |
| 175747        | 177517      | 2674064 | 2677335 | -1 | 1       | RO3G_16992.1 | RO3G_09031.1 | 832  | 493  | 88.84 |  |
| ##Scaffold_25 | Scaffold_4  | 87950   | 119952  | 4  | 379423  | 420222       | -1           | 8    |      |       |  |
| 118092        | 119952      | 379423  | 381287  | -1 | 1       | RO3G_17064.1 | RO3G_05654.1 | 1129 | 571  | 99.82 |  |

|               |             |         |         |    |         |              |              |      |     |       |
|---------------|-------------|---------|---------|----|---------|--------------|--------------|------|-----|-------|
| 112736        | 113519      | 385831  | 386375  | -1 | 1       | RO3G_17062.1 | RO3G_05657.1 | 128  | 162 | 54.94 |
| 100159        | 101487      | 398878  | 399852  | -1 | 1       | RO3G_17056.1 | RO3G_05663.1 | 232  | 157 | 70.06 |
| 97591         | 99843       | 400049  | 402301  | 1  | -1      | RO3G_17055.1 | RO3G_05664.1 | 1289 | 751 | 86.82 |
| 93388         | 93997       | 411404  | 412648  | -1 | 1       | RO3G_17054.1 | RO3G_05668.1 | 195  | 136 | 81.62 |
| 92285         | 92658       | 413653  | 414073  | 1  | -1      | RO3G_17053.1 | RO3G_05669.1 | 141  | 98  | 68.37 |
| 89482         | 90126       | 418105  | 418758  | -1 | 1       | RO3G_17051.1 | RO3G_05672.1 | 207  | 202 | 59.9  |
| 87950         | 88694       | 419235  | 420222  | 1  | -1      | RO3G_17050.1 | RO3G_05673.1 | 159  | 166 | 57.83 |
| ##Scaffold_27 | Scaffold_1  | 45872   | 51617   | 1  | 5640603 | 5647018      | -1           | 3    |     |       |
| 50723         | 51617       | 5640603 | 5641416 | 1  | -1      | RO3G_17175.1 | RO3G_02193.1 | 266  | 180 | 70.56 |
| 49535         | 50416       | 5641498 | 5642580 | 1  | -1      | RO3G_17174.1 | RO3G_02194.1 | 384  | 197 | 98.98 |
| 45872         | 47620       | 5645329 | 5647018 | 1  | -1      | RO3G_17173.1 | RO3G_02197.1 | 797  | 428 | 92.99 |
| ##Scaffold_27 | Scaffold_3  | 96256   | 103242  | 3  | 2232091 | 2238936      | 1            | 3    |     |       |
| 96256         | 98218       | 2232091 | 2233287 | 1  | 1       | RO3G_17193.1 | RO3G_05062.1 | 348  | 284 | 63.38 |
| 98470         | 99020       | 2233954 | 2234468 | -1 | -1      | RO3G_17194.1 | RO3G_05063.1 | 125  | 56  | 98.21 |
| 101602        | 103242      | 2237283 | 2238936 | 1  | 1       | RO3G_17196.1 | RO3G_05065.1 | 855  | 453 | 99.34 |
| ##Scaffold_3  | Scaffold_1  | 1739965 | 1759639 | 1  | 4322746 | 4339475      | 1            | 4    |     |       |
| 1739965       | 1741648     | 4322746 | 4325046 | 1  | 1       | RO3G_04858.1 | RO3G_01670.1 | 689  | 427 | 78.22 |
| 1752045       | 1753673     | 4328025 | 4329658 | -1 | -1      | RO3G_04863.1 | RO3G_01672.1 | 954  | 485 | 99.18 |
| 1755449       | 1757983     | 4335837 | 4337834 | 1  | 1       | RO3G_04864.1 | RO3G_01675.1 | 858  | 465 | 90.32 |
| 1758159       | 1759639     | 4339019 | 4339475 | -1 | -1      | RO3G_04865.1 | RO3G_01677.1 | 229  | 133 | 83.46 |
| ##Scaffold_3  | Scaffold_1  | 2148974 | 2156770 | 1  | 2277619 | 2284235      | -1           | 3    |     |       |
| 2155500       | 2156770     | 2277619 | 2278794 | -1 | 1       | RO3G_05029.1 | RO3G_00896.1 | 379  | 360 | 63.61 |
| 2154560       | 2155278     | 2279002 | 2279729 | 1  | -1      | RO3G_05028.1 | RO3G_00897.1 | 232  | 199 | 66.33 |
| 2148974       | 2150148     | 2282830 | 2284235 | 1  | -1      | RO3G_05025.1 | RO3G_00898.1 | 236  | 217 | 52.07 |
| ##Scaffold_3  | Scaffold_1  | 2058879 | 2085311 | 1  | 4348205 | 4365434      | -1           | 4    |     |       |
| 2081332       | 2085311     | 4348205 | 4350856 | 1  | -1      | RO3G_04999.1 | RO3G_01681.1 | 1070 | 816 | 70.47 |
| 2076248       | 2076673     | 4358023 | 4358445 | -1 | 1       | RO3G_04997.1 | RO3G_01685.1 | 150  | 139 | 79.14 |
| 2063883       | 2065638     | 4362564 | 4363763 | -1 | 1       | RO3G_04991.1 | RO3G_01686.1 | 457  | 325 | 73.23 |
| 2058879       | 2059938     | 4364361 | 4365434 | -1 | 1       | RO3G_04988.1 | RO3G_01687.1 | 622  | 320 | 98.75 |
| ##Scaffold_3  | Scaffold_1  | 2023564 | 2044323 | 1  | 4377771 | 4387964      | -1           | 3    |     |       |
| 2041508       | 2044323     | 4377771 | 4380355 | 1  | -1      | RO3G_04980.1 | RO3G_01693.1 | 1079 | 752 | 80.72 |
| 2029046       | 2029743     | 4383902 | 4384804 | 1  | -1      | RO3G_04976.1 | RO3G_01694.1 | 216  | 185 | 61.08 |
| 2023564       | 2024574     | 4386984 | 4387964 | 1  | -1      | RO3G_04973.1 | RO3G_01695.1 | 488  | 337 | 78.34 |
| ##Scaffold_3  | Scaffold_1  | 2693474 | 2709438 | 1  | 2290435 | 2301669      | 1            | 3    |     |       |
| 2693474       | 2694712     | 2290435 | 2291150 | 1  | 1       | RO3G_05242.1 | RO3G_00900.1 | 322  | 197 | 83.25 |
| 2697565       | 2699340     | 2293685 | 2295456 | 1  | 1       | RO3G_05244.1 | RO3G_00902.1 | 867  | 496 | 89.31 |
| 2708632       | 2709438     | 2301025 | 2301669 | -1 | -1      | RO3G_05250.1 | RO3G_00905.1 | 311  | 206 | 70.39 |
| ##Scaffold_3  | Scaffold_3  | 2822294 | 2826729 | 1  | 2236971 | 2244622      | -1           | 3    |     |       |
| 2825378       | 2826729     | 2236971 | 2238474 | -1 | 1       | RO3G_05291.1 | RO3G_00881.1 | 733  | 403 | 87.1  |
| 2823434       | 2824187     | 2240573 | 2241323 | -1 | 1       | RO3G_05289.1 | RO3G_00883.1 | 324  | 179 | 88.83 |
| 2822294       | 2823007     | 2243780 | 2244622 | -1 | 1       | RO3G_05288.1 | RO3G_00885.1 | 387  | 202 | 97.03 |
| ##Scaffold_3  | Scaffold_1  | 3027091 | 3052787 | 1  | 1674847 | 1699180      | -1           | 7    |     |       |
| 3051868       | 3052787     | 1674847 | 1675966 | 1  | -1      | RO3G_05379.1 | RO3G_00664.1 | 226  | 192 | 70.83 |
| 3046924       | 3047825     | 1678789 | 1679370 | 1  | -1      | RO3G_05377.1 | RO3G_00665.1 | 244  | 176 | 80.11 |
| 3042781       | 3043734     | 1681663 | 1682304 | 1  | -1      | RO3G_05375.1 | RO3G_00666.1 | 301  | 217 | 76.5  |
| 3040122       | 3041439     | 1685798 | 1686784 | -1 | 1       | RO3G_05374.1 | RO3G_00668.1 | 498  | 328 | 80.18 |
| 3038913       | 3039469     | 1692207 | 1693682 | 1  | -1      | RO3G_05373.1 | RO3G_00670.1 | 171  | 95  | 81.05 |
| 3028752       | 3029256     | 1697065 | 1697462 | -1 | 1       | RO3G_05370.1 | RO3G_00673.1 | 158  | 88  | 90.91 |
| 3027091       | 3028390     | 1697768 | 1699180 | 1  | -1      | RO3G_05369.1 | RO3G_00674.1 | 279  | 424 | 54.01 |
| ##Scaffold_3  | Scaffold_1  | 3316695 | 3333906 | 1  | 1834274 | 1857190      | 1            | 6    |     |       |
| 3316695       | 3317390     | 1834274 | 1835377 | -1 | -1      | RO3G_05476.1 | RO3G_00729.1 | 251  | 365 | 43.84 |
| 3318802       | 3319503     | 1838611 | 1839346 | 1  | 1       | RO3G_05477.1 | RO3G_00731.1 | 283  | 149 | 95.3  |
| 3319846       | 3320141     | 1839413 | 1840165 | -1 | -1      | RO3G_05478.1 | RO3G_00732.1 | 117  | 84  | 64.29 |
| 3324668       | 3324967     | 1849249 | 1849545 | 1  | 1       | RO3G_05480.1 | RO3G_00735.1 | 161  | 97  | 81.44 |
| 3325339       | 3326298     | 1849981 | 1851664 | -1 | -1      | RO3G_05481.1 | RO3G_00736.1 | 449  | 291 | 84.19 |
| 3332302       | 3333906     | 1855837 | 1857190 | 1  | 1       | RO3G_05484.1 | RO3G_00739.1 | 646  | 340 | 97.06 |
| ##Scaffold_3  | Scaffold_24 | 1871369 | 1884852 | 24 | 46532   | 55681        | -1           | 3    |     |       |
| 1882543       | 1884852     | 46532   | 48841   | -1 | 1       | RO3G_04919.1 | RO3G_16940.1 | 1425 | 769 | 97.53 |
| 1872937       | 1874731     | 49502   | 51269   | -1 | 1       | RO3G_04913.1 | RO3G_16941.1 | 969  | 512 | 94.92 |
| 1871369       | 1872855     | 54225   | 55681   | 1  | -1      | RO3G_04912.1 | RO3G_16944.1 | 654  | 380 | 93.95 |
| ##Scaffold_3  | Scaffold_24 | 1844345 | 1851624 | 24 | 78736   | 84074        | -1           | 3    |     |       |
| 1850836       | 1851624     | 78736   | 79483   | -1 | 1       | RO3G_04904.1 | RO3G_16953.1 | 209  | 156 | 67.95 |
| 1846411       | 1848217     | 80180   | 82209   | -1 | 1       | RO3G_04903.1 | RO3G_16954.1 | 717  | 492 | 74.39 |
| 1844345       | 1845596     | 83195   | 84074   | 1  | -1      | RO3G_04902.1 | RO3G_16955.1 | 435  | 258 | 98.45 |
| ##Scaffold_3  | Scaffold_27 | 2232091 | 2238936 | 27 | 96256   | 103242       | 1            | 3    |     |       |

|              |            |         |         |    |         |              |              |      |      |       |
|--------------|------------|---------|---------|----|---------|--------------|--------------|------|------|-------|
| 2232091      | 2233287    | 96256   | 98218   | 1  | 1       | RO3G_05062.1 | RO3G_17193.1 | 348  | 284  | 63.38 |
| 2233954      | 2234468    | 98470   | 99020   | -1 | -1      | RO3G_05063.1 | RO3G_17194.1 | 125  | 56   | 98.21 |
| 2237283      | 2238936    | 101602  | 103242  | 1  | 1       | RO3G_05065.1 | RO3G_17196.1 | 855  | 453  | 99.34 |
| ##Scaffold_3 | Scaffold_3 | 1772380 | 1801297 | 3  | 173163  | 217959       | 1            | 5    |      |       |
| 1772380      | 1774089    | 173163  | 175421  | 1  | 1       | RO3G_04871.1 | RO3G_04278.1 | 479  | 371  | 67.92 |
| 1783122      | 1784198    | 184486  | 185597  | 1  | 1       | RO3G_04876.1 | RO3G_04284.1 | 464  | 309  | 88.35 |
| 1786718      | 1788800    | 191162  | 193738  | -1 | -1      | RO3G_04878.1 | RO3G_04287.1 | 663  | 669  | 58.45 |
| 1793650      | 1795462    | 198961  | 200758  | -1 | -1      | RO3G_04880.1 | RO3G_04289.1 | 953  | 524  | 93.32 |
| 1800112      | 1801297    | 216550  | 217959  | -1 | -1      | RO3G_04882.1 | RO3G_04295.1 | 412  | 426  | 56.34 |
| ##Scaffold_3 | Scaffold_4 | 496272  | 510132  | 4  | 140017  | 155891       | -1           | 3    |      |       |
| 507429       | 510132     | 140017  | 142228  | 1  | -1      | RO3G_04406.1 | RO3G_05579.1 | 721  | 662  | 56.65 |
| 502610       | 504508     | 147466  | 149132  | 1  | -1      | RO3G_04404.1 | RO3G_05582.1 | 378  | 392  | 65.82 |
| 496272       | 499237     | 152557  | 155891  | 1  | -1      | RO3G_04403.1 | RO3G_05583.1 | 1318 | 864  | 85.76 |
| ##Scaffold_3 | Scaffold_5 | 1453173 | 1489060 | 5  | 167202  | 199282       | -1           | 5    |      |       |
| 1486022      | 1489060    | 167202  | 169268  | 1  | -1      | RO3G_04754.1 | RO3G_06796.1 | 1080 | 634  | 89.75 |
| 1483474      | 1484143    | 172607  | 173171  | -1 | 1       | RO3G_04753.1 | RO3G_06798.1 | 167  | 193  | 48.7  |
| 1475629      | 1481888    | 174028  | 178182  | 1  | -1      | RO3G_04752.1 | RO3G_06799.1 | 1533 | 1249 | 68.94 |
| 1471933      | 1473400    | 179697  | 181911  | 1  | -1      | RO3G_04751.1 | RO3G_06801.1 | 343  | 250  | 78.8  |
| 1453173      | 1456259    | 196028  | 199282  | 1  | -1      | RO3G_04747.1 | RO3G_06809.1 | 988  | 968  | 63.43 |
| ##Scaffold_3 | Scaffold_5 | 1642932 | 1671669 | 5  | 59583   | 90938        | -1           | 5    |      |       |
| 1670747      | 1671669    | 59583   | 60505   | -1 | 1       | RO3G_04826.1 | RO3G_06756.1 | 347  | 286  | 72.38 |
| 1669296      | 1669861    | 61504   | 61873   | -1 | 1       | RO3G_04825.1 | RO3G_06757.1 | 185  | 101  | 92.08 |
| 1662733      | 1665134    | 65462   | 67809   | -1 | 1       | RO3G_04824.1 | RO3G_06759.1 | 1145 | 771  | 76.01 |
| 1645111      | 1649276    | 85065   | 88872   | 1  | -1      | RO3G_04817.1 | RO3G_06767.1 | 1065 | 1067 | 61.2  |
| 1642932      | 1643825    | 90132   | 90938   | 1  | -1      | RO3G_04815.1 | RO3G_06768.1 | 421  | 264  | 71.59 |
| ##Scaffold_3 | Scaffold_5 | 2512567 | 2550158 | 5  | 578830  | 606122       | 1            | 5    |      |       |
| 2512567      | 2512809    | 578830  | 579135  | -1 | -1      | RO3G_05179.1 | RO3G_06969.1 | 127  | 98   | 65.31 |
| 2526212      | 2527643    | 581693  | 583043  | 1  | 1       | RO3G_05185.1 | RO3G_06971.1 | 389  | 355  | 55.77 |
| 2532956      | 2533752    | 598251  | 598826  | 1  | 1       | RO3G_05188.1 | RO3G_06978.1 | 228  | 122  | 95.08 |
| 2543864      | 2544585    | 602966  | 603688  | -1 | -1      | RO3G_05193.1 | RO3G_06981.1 | 391  | 203  | 98.52 |
| 2548933      | 2550158    | 604885  | 606122  | 1  | 1       | RO3G_05195.1 | RO3G_06982.1 | 659  | 352  | 92.05 |
| ##Scaffold_3 | Scaffold_5 | 2630483 | 2640732 | 5  | 677654  | 685720       | 1            | 3    |      |       |
| 2630483      | 2632611    | 677654  | 679063  | 1  | 1       | RO3G_05223.1 | RO3G_07014.1 | 365  | 340  | 56.18 |
| 2633034      | 2633807    | 679981  | 680844  | -1 | -1      | RO3G_05224.1 | RO3G_07015.1 | 160  | 145  | 60    |
| 2640115      | 2640732    | 685118  | 685720  | -1 | -1      | RO3G_05225.1 | RO3G_07016.1 | 169  | 224  | 46.88 |
| ##Scaffold_3 | Scaffold_7 | 285085  | 301470  | 7  | 292377  | 307378       | -1           | 5    |      |       |
| 300900       | 301470     | 292377  | 292950  | -1 | 1       | RO3G_04330.1 | RO3G_09303.1 | 125  | 156  | 65.38 |
| 296040       | 296389     | 297152  | 297511  | 1  | -1      | RO3G_04326.1 | RO3G_09306.1 | 141  | 101  | 91.09 |
| 288974       | 291845     | 300702  | 303036  | -1 | 1       | RO3G_04324.1 | RO3G_09308.1 | 821  | 678  | 78.91 |
| 286376       | 288723     | 303766  | 306127  | -1 | 1       | RO3G_04323.1 | RO3G_09309.1 | 1295 | 723  | 92.53 |
| 285085       | 286054     | 306458  | 307378  | 1  | -1      | RO3G_04322.1 | RO3G_09310.1 | 204  | 208  | 68.27 |
| ##Scaffold_3 | Scaffold_8 | 1943152 | 1958910 | 8  | 2206482 | 2225014      | 1            | 4    |      |       |
| 1943152      | 1943856    | 2206482 | 2207186 | -1 | -1      | RO3G_04941.1 | RO3G_11031.1 | 328  | 234  | 82.91 |
| 1951832      | 1953437    | 2213607 | 2215084 | -1 | -1      | RO3G_04947.1 | RO3G_11034.1 | 521  | 495  | 61.01 |
| 1957186      | 1957739    | 2223782 | 2224338 | -1 | -1      | RO3G_04949.1 | RO3G_11037.1 | 301  | 148  | 97.3  |
| 1957907      | 1958910    | 2224654 | 2225014 | 1  | 1       | RO3G_04950.1 | RO3G_11038.1 | 152  | 68   | 97.06 |
| ##Scaffold_3 | Scaffold_8 | 2305595 | 2320106 | 8  | 2060028 | 2091501      | -1           | 5    |      |       |
| 2318215      | 2320106    | 2060028 | 2065387 | -1 | 1       | RO3G_05103.1 | RO3G_10973.1 | 493  | 335  | 88.06 |
| 2315079      | 2317361    | 2066247 | 2068511 | 1  | -1      | RO3G_05101.1 | RO3G_10974.1 | 1061 | 703  | 73.83 |
| 2313367      | 2314656    | 2072849 | 2074143 | 1  | -1      | RO3G_05100.1 | RO3G_10977.1 | 513  | 330  | 79.39 |
| 2311510      | 2312828    | 2074644 | 2075970 | -1 | 1       | RO3G_05099.1 | RO3G_10978.1 | 383  | 269  | 75.46 |
| 2305595      | 2305883    | 2091215 | 2091501 | -1 | 1       | RO3G_05096.1 | RO3G_10984.1 | 96.7 | 76   | 55.26 |
| ##Scaffold_3 | Scaffold_8 | 2278642 | 2298135 | 8  | 2118018 | 2138198      | -1           | 7    |      |       |
| 2297561      | 2298135    | 2118018 | 2118708 | 1  | -1      | RO3G_05092.1 | RO3G_10994.1 | 172  | 126  | 61.9  |
| 2288139      | 2289094    | 2122676 | 2123600 | 1  | -1      | RO3G_05089.1 | RO3G_10997.1 | 445  | 220  | 97.27 |
| 2287057      | 2287896    | 2124201 | 2124653 | -1 | 1       | RO3G_05088.1 | RO3G_10998.1 | 265  | 150  | 98    |
| 2283244      | 2284621    | 2127129 | 2128647 | 1  | -1      | RO3G_05087.1 | RO3G_11000.1 | 566  | 345  | 81.74 |
| 2281486      | 2282583    | 2132669 | 2133769 | -1 | 1       | RO3G_05086.1 | RO3G_11003.1 | 566  | 330  | 91.52 |
| 2280030      | 2281131    | 2135288 | 2136388 | -1 | 1       | RO3G_05085.1 | RO3G_11004.1 | 601  | 310  | 96.77 |
| 2278642      | 2279184    | 2137494 | 2138198 | -1 | 1       | RO3G_05084.1 | RO3G_11005.1 | 113  | 164  | 45.73 |
| ##Scaffold_3 | Scaffold_8 | 2447901 | 2488189 | 8  | 1979675 | 2005287      | -1           | 5    |      |       |
| 2487332      | 2488189    | 1979675 | 1980622 | -1 | 1       | RO3G_05165.1 | RO3G_10940.1 | 139  | 143  | 60.84 |
| 2474494      | 2475747    | 1986310 | 1987236 | -1 | 1       | RO3G_05159.1 | RO3G_10942.1 | 327  | 317  | 59.94 |
| 2462479      | 2463537    | 1987581 | 1988653 | -1 | 1       | RO3G_05156.1 | RO3G_10943.1 | 476  | 245  | 95.1  |
| 2452849      | 2453207    | 1997333 | 1997672 | 1  | -1      | RO3G_05152.1 | RO3G_10949.1 | 150  | 75   | 98.67 |
| 2447901      | 2449025    | 2004163 | 2005287 | -1 | 1       | RO3G_05150.1 | RO3G_10952.1 | 610  | 374  | 77.54 |
| ##Scaffold_3 | Scaffold_8 | 2405983 | 2414111 | 8  | 2274238 | 2281520      | -1           | 3    |      |       |

|              |             |         |         |    |         |              |              |      |      |       |
|--------------|-------------|---------|---------|----|---------|--------------|--------------|------|------|-------|
| 2413581      | 2414111     | 2274238 | 2274798 | 1  | -1      | RO3G_05140.1 | RO3G_11057.1 | 231  | 142  | 88.73 |
| 2407668      | 2408866     | 2279269 | 2279958 | 1  | -1      | RO3G_05137.1 | RO3G_11061.1 | 192  | 145  | 73.79 |
| 2405983      | 2407257     | 2280266 | 2281520 | 1  | -1      | RO3G_05136.1 | RO3G_11062.1 | 531  | 300  | 84.67 |
| ##Scaffold_3 | Scaffold_9  | 622808  | 639056  | 9  | 128981  | 150483       | -1           | 4    |      |       |
| 638340       | 639056      | 128981  | 129689  | -1 | 1       | RO3G_04456.1 | RO3G_11156.1 | 360  | 180  | 98.89 |
| 629178       | 631452      | 135927  | 138289  | -1 | 1       | RO3G_04453.1 | RO3G_11158.1 | 820  | 644  | 64.29 |
| 625467       | 627019      | 145804  | 147370  | 1  | -1      | RO3G_04451.1 | RO3G_11162.1 | 832  | 429  | 99.53 |
| 622808       | 623856      | 149092  | 150483  | 1  | -1      | RO3G_04450.1 | RO3G_11163.1 | 401  | 346  | 60.98 |
| ##Scaffold_4 | Scaffold_1  | 164669  | 209951  | 1  | 2972202 | 3006213      | 1            | 7    |      |       |
| 164669       | 165459      | 2972202 | 2972976 | -1 | -1      | RO3G_05587.1 | RO3G_01173.1 | 135  | 98   | 72.45 |
| 168658       | 172910      | 2973788 | 2977012 | 1  | 1       | RO3G_05589.1 | RO3G_01174.1 | 870  | 693  | 66.96 |
| 173228       | 175047      | 2977942 | 2979738 | -1 | -1      | RO3G_05590.1 | RO3G_01175.1 | 659  | 518  | 74.9  |
| 177360       | 185781      | 2980190 | 2987338 | -1 | -1      | RO3G_05593.1 | RO3G_01176.1 | 1911 | 1562 | 68.63 |
| 191623       | 193127      | 2994842 | 2995714 | 1  | 1       | RO3G_05595.1 | RO3G_01181.1 | 332  | 226  | 74.78 |
| 205978       | 207794      | 3001057 | 3002940 | -1 | -1      | RO3G_05600.1 | RO3G_01184.1 | 605  | 522  | 60.73 |
| 208364       | 209951      | 3004847 | 3006213 | -1 | -1      | RO3G_05601.1 | RO3G_01185.1 | 329  | 509  | 52.85 |
| ##Scaffold_4 | Scaffold_1  | 1497289 | 1516902 | 1  | 62010   | 84064        | 1            | 4    |      |       |
| 1497289      | 1498647     | 62010   | 63496   | -1 | -1      | RO3G_06049.1 | RO3G_00024.1 | 637  | 338  | 93.2  |
| 1498815      | 1501111     | 63914   | 65025   | -1 | -1      | RO3G_06050.1 | RO3G_00025.1 | 560  | 348  | 82.47 |
| 1510755      | 1512183     | 78434   | 79817   | 1  | 1       | RO3G_06055.1 | RO3G_00031.1 | 542  | 439  | 59    |
| 1515966      | 1516902     | 83378   | 84064   | 1  | 1       | RO3G_06056.1 | RO3G_00034.1 | 182  | 145  | 62.76 |
| ##Scaffold_4 | Scaffold_1  | 1522902 | 1539997 | 1  | 100036  | 112457       | -1           | 3    |      |       |
| 1539669      | 1539997     | 100036  | 100341  | 1  | -1      | RO3G_06064.1 | RO3G_00043.1 | 108  | 106  | 55.66 |
| 1535524      | 1538325     | 104076  | 105388  | -1 | 1       | RO3G_06063.1 | RO3G_00045.1 | 411  | 375  | 58.13 |
| 1522902      | 1524173     | 111357  | 112457  | 1  | -1      | RO3G_06058.1 | RO3G_00049.1 | 300  | 183  | 76.5  |
| ##Scaffold_4 | Scaffold_1  | 1833814 | 1854876 | 1  | 1070409 | 1088933      | 1            | 4    |      |       |
| 1833814      | 1834281     | 1070409 | 1070876 | 1  | 1       | RO3G_06177.1 | RO3G_00430.1 | 246  | 155  | 96.77 |
| 1847158      | 1848769     | 1081320 | 1082875 | 1  | 1       | RO3G_06181.1 | RO3G_00434.1 | 748  | 472  | 77.33 |
| 1849807      | 1850490     | 1083195 | 1083873 | 1  | 1       | RO3G_06182.1 | RO3G_00435.1 | 189  | 187  | 68.45 |
| 1853380      | 1854876     | 1087478 | 1088933 | -1 | -1      | RO3G_06184.1 | RO3G_00437.1 | 516  | 348  | 70.69 |
| ##Scaffold_4 | Scaffold_1  | 2115360 | 2151664 | 1  | 1168571 | 1179342      | 1            | 4    |      |       |
| 2138900      | 2140152     | 1168571 | 1169602 | 1  | 1       | RO3G_06287.1 | RO3G_00461.1 | 294  | 301  | 56.81 |
| 2142082      | 2144478     | 1170026 | 1172275 | -1 | -1      | RO3G_06289.1 | RO3G_00462.1 | 1031 | 758  | 69.66 |
| 2150054      | 2151664     | 1174907 | 1176522 | 1  | 1       | RO3G_06292.1 | RO3G_00463.1 | 991  | 520  | 91.54 |
| 2115360      | 2118009     | 1176908 | 1179342 | -1 | -1      | RO3G_06279.1 | RO3G_00464.1 | 869  | 787  | 72.05 |
| ##Scaffold_4 | Scaffold_14 | 83188   | 91387   | 14 | 831030  | 839224       | 1            | 3    |      |       |
| 83188        | 83927       | 831030  | 832154  | -1 | -1      | RO3G_05554.1 | RO3G_14663.1 | 309  | 229  | 69.87 |
| 87075        | 88827       | 834742  | 836461  | 1  | 1       | RO3G_05555.1 | RO3G_14665.1 | 630  | 553  | 70.89 |
| 89038        | 91387       | 836610  | 839224  | -1 | -1      | RO3G_05556.1 | RO3G_14666.1 | 741  | 671  | 59.91 |
| ##Scaffold_4 | Scaffold_15 | 1673661 | 1680776 | 15 | 869465  | 880759       | 1            | 3    |      |       |
| 1673661      | 1675564     | 869465  | 871449  | -1 | -1      | RO3G_06113.1 | RO3G_15121.1 | 462  | 586  | 48.81 |
| 1679229      | 1679767     | 876095  | 876726  | 1  | 1       | RO3G_06117.1 | RO3G_15122.1 | 147  | 121  | 66.12 |
| 1680331      | 1680776     | 880271  | 880759  | -1 | -1      | RO3G_06118.1 | RO3G_15124.1 | 210  | 113  | 89.38 |
| ##Scaffold_4 | Scaffold_18 | 1935966 | 1952623 | 18 | 520221  | 541847       | -1           | 5    |      |       |
| 1951527      | 1952623     | 520221  | 521333  | 1  | -1      | RO3G_06221.1 | RO3G_16080.1 | 398  | 260  | 92.31 |
| 1950113      | 1951221     | 521551  | 522709  | 1  | -1      | RO3G_06220.1 | RO3G_16081.1 | 140  | 294  | 35.71 |
| 1944715      | 1945661     | 523622  | 524556  | -1 | 1       | RO3G_06217.1 | RO3G_16083.1 | 408  | 230  | 89.13 |
| 1939885      | 1940415     | 534063  | 535479  | -1 | 1       | RO3G_06215.1 | RO3G_16087.1 | 183  | 176  | 53.98 |
| 1935966      | 1936822     | 540990  | 541847  | 1  | -1      | RO3G_06213.1 | RO3G_16089.1 | 401  | 267  | 77.9  |
| ##Scaffold_4 | Scaffold_18 | 2037373 | 2044821 | 18 | 317169  | 329021       | 1            | 4    |      |       |
| 2037373      | 2038148     | 317169  | 317942  | 1  | 1       | RO3G_06245.1 | RO3G_15996.1 | 416  | 211  | 99.53 |
| 2041940      | 2042879     | 319599  | 320748  | -1 | -1      | RO3G_06248.1 | RO3G_15998.1 | 290  | 149  | 96.64 |
| 2043092      | 2044120     | 322370  | 323696  | 1  | 1       | RO3G_06249.1 | RO3G_15999.1 | 207  | 281  | 47.69 |
| 2044204      | 2044821     | 328425  | 329021  | -1 | -1      | RO3G_06250.1 | RO3G_16001.1 | 171  | 138  | 57.97 |
| ##Scaffold_4 | Scaffold_2  | 966238  | 975018  | 2  | 4966411 | 4972744      | -1           | 3    |      |       |
| 973385       | 975018      | 4966411 | 4967519 | 1  | -1      | RO3G_05875.1 | RO3G_04162.1 | 471  | 305  | 89.51 |
| 968018       | 968855      | 4969965 | 4971340 | 1  | -1      | RO3G_05872.1 | RO3G_04164.1 | 346  | 236  | 71.19 |
| 966238       | 967488      | 4971818 | 4972744 | 1  | -1      | RO3G_05871.1 | RO3G_04165.1 | 284  | 315  | 48.89 |
| ##Scaffold_4 | Scaffold_25 | 372363  | 418758  | 25 | 89482   | 127371       | -1           | 8    |      |       |
| 418105       | 418758      | 89482   | 90126   | 1  | -1      | RO3G_05672.1 | RO3G_17051.1 | 207  | 202  | 59.9  |
| 413653       | 414073      | 92285   | 92658   | -1 | 1       | RO3G_05669.1 | RO3G_17053.1 | 141  | 98   | 68.37 |
| 411404       | 412648      | 93388   | 93997   | 1  | -1      | RO3G_05668.1 | RO3G_17054.1 | 195  | 136  | 81.62 |
| 400049       | 402301      | 97591   | 99843   | -1 | 1       | RO3G_05664.1 | RO3G_17055.1 | 1289 | 751  | 86.82 |
| 398878       | 399852      | 100159  | 101487  | 1  | -1      | RO3G_05663.1 | RO3G_17056.1 | 232  | 157  | 70.06 |
| 385831       | 386375      | 112736  | 113519  | 1  | -1      | RO3G_05657.1 | RO3G_17062.1 | 128  | 162  | 54.94 |
| 379423       | 381287      | 118092  | 119952  | 1  | -1      | RO3G_05654.1 | RO3G_17064.1 | 1129 | 571  | 99.82 |
| 372363       | 373773      | 125958  | 127371  | 1  | -1      | RO3G_05651.1 | RO3G_17067.1 | 668  | 429  | 74.83 |

|              |             |         |         |    |         |              |              |      |      |       |  |  |
|--------------|-------------|---------|---------|----|---------|--------------|--------------|------|------|-------|--|--|
| ##Scaffold_4 | Scaffold_3  | 134947  | 149132  | 3  | 502610  | 512992       | -1           | 3    |      |       |  |  |
| 147466       | 149132      | 502610  | 504508  | -1 | 1       | RO3G_05582.1 | RO3G_04404.1 | 378  | 392  | 65.82 |  |  |
| 140017       | 142228      | 507429  | 510132  | -1 | 1       | RO3G_05579.1 | RO3G_04406.1 | 721  | 662  | 56.65 |  |  |
| 134947       | 135595      | 512756  | 512992  | 1  | -1      | RO3G_05576.1 | RO3G_04408.1 | 139  | 77   | 87.01 |  |  |
| ##Scaffold_4 | Scaffold_5  | 2848725 | 2856699 | 5  | 2293793 | 2300988      | -1           | 3    |      |       |  |  |
| 2856197      | 2856699     | 2293793 | 2294825 | -1 | 1       | RO3G_06559.1 | RO3G_07641.1 | 141  | 153  | 56.86 |  |  |
| 2854244      | 2855878     | 2294990 | 2296932 | -1 | 1       | RO3G_06558.1 | RO3G_07642.1 | 523  | 374  | 68.45 |  |  |
| 2848725      | 2850579     | 2299015 | 2300988 | -1 | 1       | RO3G_06556.1 | RO3G_07643.1 | 324  | 211  | 76.78 |  |  |
| ##Scaffold_4 | Scaffold_7  | 2237170 | 2259379 | 7  | 2087308 | 2113149      | 1            | 5    |      |       |  |  |
| 2237170      | 2238048     | 2087308 | 2088384 | -1 | -1      | RO3G_06324.1 | RO3G_10005.1 | 437  | 258  | 80.62 |  |  |
| 2248149      | 2250337     | 2092357 | 2093959 | -1 | -1      | RO3G_06329.1 | RO3G_10007.1 | 542  | 382  | 78.8  |  |  |
| 2251485      | 2252431     | 2098919 | 2099682 | -1 | -1      | RO3G_06330.1 | RO3G_10009.1 | 239  | 167  | 73.65 |  |  |
| 2255946      | 2256559     | 2106809 | 2107377 | -1 | -1      | RO3G_06332.1 | RO3G_10014.1 | 214  | 106  | 100   |  |  |
| 2258902      | 2259379     | 2112741 | 2113149 | 1  | 1       | RO3G_06334.1 | RO3G_10017.1 | 150  | 138  | 68.84 |  |  |
| ##Scaffold_4 | Scaffold_7  | 2203419 | 2225136 | 7  | 2243731 | 2269518      | -1           | 5    |      |       |  |  |
| 2222477      | 2225136     | 2243731 | 2245458 | 1  | -1      | RO3G_06320.1 | RO3G_10068.1 | 423  | 459  | 55.77 |  |  |
| 2213649      | 2214453     | 2253998 | 2254792 | -1 | 1       | RO3G_06318.1 | RO3G_10072.1 | 320  | 176  | 83.52 |  |  |
| 2210621      | 2213295     | 2255156 | 2257614 | 1  | -1      | RO3G_06317.1 | RO3G_10073.1 | 576  | 700  | 51.43 |  |  |
| 2206181      | 2206836     | 2264274 | 2265050 | 1  | -1      | RO3G_06314.1 | RO3G_10076.1 | 197  | 126  | 79.37 |  |  |
| 2203419      | 2204318     | 2268500 | 2269518 | 1  | -1      | RO3G_06313.1 | RO3G_10078.1 | 281  | 211  | 61.61 |  |  |
| ##Scaffold_5 | Scaffold_1  | 284891  | 294155  | 1  | 4846119 | 4857658      | 1            | 3    |      |       |  |  |
| 284891       | 291199      | 4846119 | 4853721 | 1  | 1       | RO3G_06842.1 | RO3G_01878.1 | 2300 | 2107 | 61.32 |  |  |
| 292625       | 293021      | 4853981 | 4854441 | 1  | 1       | RO3G_06844.1 | RO3G_01879.1 | 135  | 108  | 62.04 |  |  |
| 293315       | 294155      | 4856675 | 4857658 | 1  | 1       | RO3G_06845.1 | RO3G_01881.1 | 519  | 264  | 94.32 |  |  |
| ##Scaffold_5 | Scaffold_1  | 1130584 | 1199115 | 1  | 1898080 | 1930471      | -1           | 5    |      |       |  |  |
| 1196136      | 1199115     | 1898080 | 1900752 | -1 | 1       | RO3G_07203.1 | RO3G_00753.1 | 944  | 840  | 69.05 |  |  |
| 1176735      | 1177506     | 1912091 | 1912849 | -1 | 1       | RO3G_07197.1 | RO3G_00757.1 | 352  | 217  | 78.8  |  |  |
| 1174817      | 1176298     | 1918641 | 1919072 | -1 | 1       | RO3G_07196.1 | RO3G_00759.1 | 144  | 101  | 67.33 |  |  |
| 1133390      | 1136327     | 1922615 | 1926049 | -1 | 1       | RO3G_07178.1 | RO3G_00761.1 | 862  | 968  | 55.17 |  |  |
| 1130584      | 1132462     | 1928298 | 1930471 | 1  | -1      | RO3G_07176.1 | RO3G_00763.1 | 362  | 498  | 51    |  |  |
| ##Scaffold_5 | Scaffold_1  | 1095290 | 1109546 | 1  | 2401358 | 2416134      | -1           | 3    |      |       |  |  |
| 1105862      | 1109546     | 2401358 | 2404385 | 1  | -1      | RO3G_07164.1 | RO3G_00949.1 | 216  | 136  | 80.15 |  |  |
| 1102946      | 1105346     | 2405151 | 2406846 | 1  | -1      | RO3G_07163.1 | RO3G_00950.1 | 893  | 505  | 87.33 |  |  |
| 1095290      | 1099356     | 2411949 | 2416134 | -1 | 1       | RO3G_07161.1 | RO3G_00951.1 | 1709 | 1242 | 76.25 |  |  |
| ##Scaffold_5 | Scaffold_1  | 1154303 | 1167443 | 1  | 2425616 | 2437262      | -1           | 3    |      |       |  |  |
| 1166410      | 1167443     | 2425616 | 2426098 | -1 | 1       | RO3G_07192.1 | RO3G_00957.1 | 114  | 85   | 67.06 |  |  |
| 1163181      | 1164072     | 2430998 | 2431836 | 1  | -1      | RO3G_07189.1 | RO3G_00960.1 | 235  | 292  | 47.6  |  |  |
| 1154303      | 1155938     | 2435372 | 2437262 | -1 | 1       | RO3G_07187.1 | RO3G_00961.1 | 612  | 436  | 69.04 |  |  |
| ##Scaffold_5 | Scaffold_1  | 1236817 | 1245436 | 1  | 2620445 | 2637336      | -1           | 3    |      |       |  |  |
| 1244986      | 1245436     | 2620445 | 2620915 | 1  | -1      | RO3G_07224.1 | RO3G_01034.1 | 226  | 111  | 97.3  |  |  |
| 1241736      | 1242539     | 2623035 | 2623817 | -1 | 1       | RO3G_07222.1 | RO3G_01036.1 | 237  | 117  | 98.29 |  |  |
| 1236817      | 1238379     | 2636110 | 2637336 | 1  | -1      | RO3G_07219.1 | RO3G_01042.1 | 677  | 371  | 95.96 |  |  |
| ##Scaffold_5 | Scaffold_10 | 2751927 | 2777449 | 10 | 388049  | 417146       | -1           | 4    |      |       |  |  |
| 2776151      | 2777449     | 388049  | 389359  | 1  | -1      | RO3G_07780.1 | RO3G_12094.1 | 455  | 437  | 68.65 |  |  |
| 2767509      | 2769452     | 393939  | 396779  | 1  | -1      | RO3G_07777.1 | RO3G_12097.1 | 373  | 639  | 40.06 |  |  |
| 2760005      | 2760738     | 405241  | 405997  | 1  | -1      | RO3G_07776.1 | RO3G_12100.1 | 175  | 105  | 77.14 |  |  |
| 2751927      | 2753802     | 415277  | 417146  | 1  | -1      | RO3G_07774.1 | RO3G_12103.1 | 673  | 513  | 67.06 |  |  |
| ##Scaffold_5 | Scaffold_10 | 3064920 | 3086882 | 10 | 1668749 | 1699510      | -1           | 5    |      |       |  |  |
| 3084734      | 3086882     | 1668749 | 1671536 | -1 | 1       | RO3G_07899.1 | RO3G_12596.1 | 755  | 546  | 79.49 |  |  |
| 3076010      | 3078755     | 1687967 | 1690641 | 1  | -1      | RO3G_07895.1 | RO3G_12602.1 | 1468 | 813  | 98.52 |  |  |
| 3073085      | 3073411     | 1691835 | 1692419 | -1 | 1       | RO3G_07893.1 | RO3G_12603.1 | 114  | 91   | 61.54 |  |  |
| 3069201      | 3069577     | 1693497 | 1693883 | 1  | -1      | RO3G_07891.1 | RO3G_12604.1 | 175  | 86   | 100   |  |  |
| 3064920      | 3067220     | 1698411 | 1699510 | -1 | 1       | RO3G_07890.1 | RO3G_12607.1 | 394  | 268  | 74.25 |  |  |
| ##Scaffold_5 | Scaffold_12 | 1363652 | 1403203 | 12 | 74784   | 104819       | -1           | 8    |      |       |  |  |
| 1401574      | 1403203     | 74784   | 76481   | 1  | -1      | RO3G_07291.1 | RO3G_13320.1 | 620  | 545  | 62.39 |  |  |
| 1396284      | 1398384     | 78173   | 80461   | 1  | -1      | RO3G_07288.1 | RO3G_13321.1 | 1219 | 627  | 98.88 |  |  |
| 1389965      | 1391077     | 81014   | 83061   | 1  | -1      | RO3G_07285.1 | RO3G_13322.1 | 398  | 259  | 78.76 |  |  |
| 1377537      | 1379356     | 86079   | 87765   | -1 | 1       | RO3G_07280.1 | RO3G_13324.1 | 344  | 321  | 63.24 |  |  |
| 1372611      | 1377228     | 87817   | 89540   | 1  | -1      | RO3G_07279.1 | RO3G_13325.1 | 148  | 291  | 45.7  |  |  |
| 1369429      | 1371353     | 90231   | 92170   | 1  | -1      | RO3G_07278.1 | RO3G_13326.1 | 265  | 172  | 76.74 |  |  |
| 1366150      | 1367799     | 95427   | 96738   | -1 | 1       | RO3G_07277.1 | RO3G_13328.1 | 533  | 349  | 74.21 |  |  |
| 1363652      | 1364640     | 103860  | 104819  | -1 | 1       | RO3G_07276.1 | RO3G_13332.1 | 313  | 173  | 87.86 |  |  |
| ##Scaffold_5 | Scaffold_12 | 1307272 | 1328585 | 12 | 602159  | 626285       | -1           | 4    |      |       |  |  |
| 1325734      | 1328585     | 602159  | 603096  | 1  | -1      | RO3G_07259.1 | RO3G_13509.1 | 367  | 241  | 75.1  |  |  |
| 1316448      | 1319343     | 610830  | 613264  | 1  | -1      | RO3G_07254.1 | RO3G_13513.1 | 865  | 750  | 70.53 |  |  |

|              |             |         |         |    |         |              |              |      |      |       |
|--------------|-------------|---------|---------|----|---------|--------------|--------------|------|------|-------|
| 1311107      | 1312559     | 618054  | 618878  | -1 | 1       | RO3G_07251.1 | RO3G_13516.1 | 335  | 205  | 80.49 |
| 1307272      | 1307896     | 625658  | 626285  | -1 | 1       | RO3G_07249.1 | RO3G_13520.1 | 262  | 136  | 100   |
| ##Scaffold_5 | Scaffold_12 | 1513665 | 1578057 | 12 | 319112  | 345455       | -1           | 3    |      |       |
| 1516153      | 1517438     | 319112  | 320339  | 1  | -1      | RO3G_07341.1 | RO3G_13412.1 | 536  | 414  | 69.08 |
| 1513665      | 1515173     | 333881  | 335580  | 1  | -1      | RO3G_07340.1 | RO3G_13420.1 | 533  | 495  | 58.99 |
| 1577638      | 1578057     | 344769  | 345455  | -1 | 1       | RO3G_07365.1 | RO3G_13424.1 | 149  | 144  | 46.53 |
| ##Scaffold_5 | Scaffold_3  | 57324   | 88872   | 3  | 1645111 | 1674000      | -1           | 5    |      |       |
| 85065        | 88872       | 1645111 | 1649276 | -1 | 1       | RO3G_06767.1 | RO3G_04817.1 | 1065 | 1067 | 61.2  |
| 65462        | 67809       | 1662733 | 1665134 | 1  | -1      | RO3G_06759.1 | RO3G_04824.1 | 1145 | 771  | 76.01 |
| 61504        | 61873       | 1669296 | 1669861 | 1  | -1      | RO3G_06757.1 | RO3G_04825.1 | 185  | 101  | 92.08 |
| 59583        | 60505       | 1670747 | 1671669 | 1  | -1      | RO3G_06756.1 | RO3G_04826.1 | 347  | 286  | 72.38 |
| 57324        | 58831       | 1672120 | 1674000 | -1 | 1       | RO3G_06755.1 | RO3G_04827.1 | 507  | 492  | 54.88 |
| ##Scaffold_5 | Scaffold_3  | 166685  | 181911  | 3  | 1471933 | 1490365      | -1           | 5    |      |       |
| 179697       | 181911      | 1471933 | 1473400 | -1 | 1       | RO3G_06801.1 | RO3G_04751.1 | 343  | 250  | 78.8  |
| 174028       | 178182      | 1475629 | 1481888 | -1 | 1       | RO3G_06799.1 | RO3G_04752.1 | 1533 | 1249 | 68.94 |
| 172607       | 173171      | 1483474 | 1484143 | 1  | -1      | RO3G_06798.1 | RO3G_04753.1 | 167  | 193  | 48.7  |
| 167202       | 169268      | 1486022 | 1489060 | -1 | 1       | RO3G_06796.1 | RO3G_04754.1 | 1080 | 634  | 89.75 |
| 166685       | 167107      | 1489946 | 1490365 | 1  | -1      | RO3G_06795.1 | RO3G_04755.1 | 171  | 142  | 61.27 |
| ##Scaffold_5 | Scaffold_3  | 578830  | 606122  | 3  | 2512567 | 2550158      | 1            | 5    |      |       |
| 578830       | 579135      | 2512567 | 2512809 | -1 | -1      | RO3G_06969.1 | RO3G_05179.1 | 127  | 98   | 65.31 |
| 581693       | 583043      | 2526212 | 2527643 | 1  | 1       | RO3G_06971.1 | RO3G_05185.1 | 389  | 355  | 55.77 |
| 598251       | 598826      | 2532956 | 2533752 | 1  | 1       | RO3G_06978.1 | RO3G_05188.1 | 228  | 122  | 95.08 |
| 602966       | 603688      | 2543864 | 2544585 | -1 | -1      | RO3G_06981.1 | RO3G_05193.1 | 391  | 203  | 98.52 |
| 604885       | 606122      | 2548933 | 2550158 | 1  | 1       | RO3G_06982.1 | RO3G_05195.1 | 659  | 352  | 92.05 |
| ##Scaffold_5 | Scaffold_3  | 677654  | 685720  | 3  | 2630483 | 2640732      | 1            | 3    |      |       |
| 677654       | 679063      | 2630483 | 2632611 | 1  | 1       | RO3G_07014.1 | RO3G_05223.1 | 365  | 340  | 56.18 |
| 679981       | 680844      | 2633034 | 2633807 | -1 | -1      | RO3G_07015.1 | RO3G_05224.1 | 160  | 145  | 60    |
| 685118       | 685720      | 2640115 | 2640732 | -1 | -1      | RO3G_07016.1 | RO3G_05225.1 | 169  | 224  | 46.88 |
| ##Scaffold_5 | Scaffold_4  | 2290174 | 2296932 | 4  | 2854244 | 2864235      | -1           | 3    |      |       |
| 2294990      | 2296932     | 2854244 | 2855878 | 1  | -1      | RO3G_07642.1 | RO3G_06558.1 | 523  | 374  | 68.45 |
| 2293793      | 2294825     | 2856197 | 2856699 | 1  | -1      | RO3G_07641.1 | RO3G_06559.1 | 141  | 153  | 56.86 |
| 2290174      | 2291690     | 2862851 | 2864235 | -1 | 1       | RO3G_07640.1 | RO3G_06561.1 | 657  | 387  | 85.53 |
| ##Scaffold_5 | Scaffold_5  | 2846188 | 2870410 | 5  | 3161820 | 3185263      | 1            | 4    |      |       |
| 2846188      | 2848262     | 3161820 | 3163734 | -1 | -1      | RO3G_07806.1 | RO3G_07933.1 | 405  | 287  | 72.82 |
| 2854996      | 2856716     | 3164982 | 3166077 | -1 | -1      | RO3G_07809.1 | RO3G_07934.1 | 152  | 213  | 48.83 |
| 2867737      | 2869493     | 3178747 | 3180738 | 1  | 1       | RO3G_07815.1 | RO3G_07939.1 | 470  | 568  | 55.99 |
| 2869806      | 2870410     | 3184697 | 3185263 | 1  | 1       | RO3G_07816.1 | RO3G_07941.1 | 286  | 152  | 87.5  |
| ##Scaffold_5 | Scaffold_5  | 3109185 | 3116837 | 5  | 2825913 | 2834321      | -1           | 3    |      |       |
| 3116268      | 3116837     | 2825913 | 2826503 | 1  | -1      | RO3G_07915.1 | RO3G_07799.1 | 320  | 197  | 85.28 |
| 3113736      | 3114513     | 2829041 | 2829930 | 1  | -1      | RO3G_07914.1 | RO3G_07801.1 | 151  | 210  | 45.71 |
| 3109185      | 3110802     | 2832624 | 2834321 | 1  | -1      | RO3G_07912.1 | RO3G_07802.1 | 655  | 377  | 86.21 |
| ##Scaffold_5 | Scaffold_5  | 3186839 | 3190713 | 5  | 2872054 | 2875890      | 1            | 3    |      |       |
| 3186839      | 3187645     | 2872054 | 2872880 | -1 | -1      | RO3G_07942.1 | RO3G_07818.1 | 379  | 249  | 71.49 |
| 3188057      | 3189097     | 2873218 | 2874275 | -1 | -1      | RO3G_07943.1 | RO3G_07819.1 | 325  | 342  | 69.59 |
| 3189675      | 3190713     | 2874852 | 2875890 | -1 | -1      | RO3G_07944.1 | RO3G_07820.1 | 620  | 313  | 96.49 |
| ##Scaffold_6 | Scaffold_1  | 399814  | 429722  | 1  | 394357  | 414176       | 1            | 4    |      |       |
| 399814       | 400037      | 394357  | 395425  | 1  | 1       | RO3G_08130.1 | RO3G_00161.1 | 103  | 58   | 77.59 |
| 406132       | 406827      | 400698  | 401562  | 1  | 1       | RO3G_08133.1 | RO3G_00163.1 | 202  | 183  | 60.66 |
| 421528       | 422334      | 410089  | 410917  | 1  | 1       | RO3G_08137.1 | RO3G_00166.1 | 236  | 160  | 82.5  |
| 426908       | 429722      | 411492  | 414176  | 1  | 1       | RO3G_08138.1 | RO3G_00167.1 | 1179 | 702  | 86.47 |
| ##Scaffold_6 | Scaffold_1  | 800185  | 810928  | 1  | 236038  | 251646       | 1            | 3    |      |       |
| 800185       | 802365      | 236038  | 237457  | 1  | 1       | RO3G_08294.1 | RO3G_00092.1 | 323  | 335  | 55.22 |
| 805567       | 807665      | 241153  | 243327  | -1 | -1      | RO3G_08297.1 | RO3G_00095.1 | 729  | 453  | 78.59 |
| 809030       | 810928      | 249883  | 251646  | 1  | 1       | RO3G_08298.1 | RO3G_00099.1 | 783  | 504  | 78.17 |
| ##Scaffold_6 | Scaffold_1  | 847739  | 916675  | 1  | 486036  | 563774       | 1            | 9    |      |       |
| 847739       | 848993      | 486036  | 486775  | -1 | -1      | RO3G_08318.1 | RO3G_00194.1 | 389  | 211  | 93.36 |
| 850808       | 851873      | 494115  | 495180  | 1  | 1       | RO3G_08319.1 | RO3G_00198.1 | 652  | 337  | 99.41 |
| 859296       | 860906      | 509648  | 511095  | -1 | -1      | RO3G_08323.1 | RO3G_00204.1 | 818  | 417  | 92.09 |
| 863283       | 863649      | 517085  | 517463  | -1 | -1      | RO3G_08326.1 | RO3G_00209.1 | 135  | 69   | 98.55 |
| 871977       | 872666      | 525489  | 526277  | 1  | 1       | RO3G_08331.1 | RO3G_00212.1 | 351  | 264  | 64.77 |
| 881722       | 882999      | 533256  | 533978  | -1 | -1      | RO3G_08336.1 | RO3G_00214.1 | 303  | 242  | 67.36 |
| 903371       | 904395      | 543813  | 545009  | 1  | 1       | RO3G_08344.1 | RO3G_00216.1 | 207  | 342  | 45.32 |
| 914268       | 914816      | 559522  | 560457  | 1  | 1       | RO3G_08347.1 | RO3G_00223.1 | 274  | 182  | 71.98 |
| 916073       | 916675      | 563051  | 563774  | -1 | -1      | RO3G_08348.1 | RO3G_00226.1 | 182  | 187  | 63.1  |
| ##Scaffold_6 | Scaffold_1  | 955647  | 981199  | 1  | 654546  | 678588       | 1            | 6    |      |       |

|              |             |         |         |    |         |              |              |      |      |       |
|--------------|-------------|---------|---------|----|---------|--------------|--------------|------|------|-------|
| 955647       | 957410      | 654546  | 656393  | 1  | 1       | RO3G_08359.1 | RO3G_00266.1 | 649  | 579  | 67.7  |
| 959039       | 962179      | 658739  | 661879  | 1  | 1       | RO3G_08360.1 | RO3G_00267.1 | 1818 | 1006 | 92.84 |
| 964238       | 965584      | 666450  | 667721  | -1 | -1      | RO3G_08362.1 | RO3G_00269.1 | 585  | 449  | 74.83 |
| 965816       | 966444      | 668103  | 668718  | -1 | -1      | RO3G_08363.1 | RO3G_00270.1 | 142  | 110  | 100   |
| 968865       | 969749      | 669230  | 669983  | -1 | -1      | RO3G_08365.1 | RO3G_00271.1 | 187  | 203  | 52.71 |
| 974037       | 981199      | 672180  | 678588  | 1  | 1       | RO3G_08367.1 | RO3G_00272.1 | 2977 | 2012 | 77.34 |
| ##Scaffold_6 | Scaffold_1  | 1071160 | 1087787 | 1  | 832002  | 848590       | -1           | 6    |      |       |
| 1086848      | 1087787     | 832002  | 832837  | -1 | 1       | RO3G_08413.1 | RO3G_00334.1 | 253  | 267  | 61.8  |
| 1080867      | 1081686     | 837684  | 838528  | -1 | 1       | RO3G_08410.1 | RO3G_00336.1 | 452  | 255  | 99.61 |
| 1077739      | 1079358     | 841490  | 842916  | 1  | -1      | RO3G_08408.1 | RO3G_00338.1 | 427  | 399  | 56.39 |
| 1075501      | 1077035     | 843437  | 845082  | -1 | 1       | RO3G_08407.1 | RO3G_00339.1 | 373  | 246  | 81.71 |
| 1073857      | 1075341     | 845284  | 846791  | -1 | 1       | RO3G_08406.1 | RO3G_00340.1 | 800  | 456  | 87.28 |
| 1071160      | 1071521     | 848217  | 848590  | 1  | -1      | RO3G_08404.1 | RO3G_00341.1 | 105  | 103  | 70.87 |
| ##Scaffold_6 | Scaffold_1  | 1153773 | 1173157 | 1  | 785073  | 807634       | 1            | 4    |      |       |
| 1153773      | 1157135     | 785073  | 789371  | 1  | 1       | RO3G_08439.1 | RO3G_00315.1 | 1686 | 929  | 92.9  |
| 1157426      | 1158028     | 789436  | 790032  | -1 | -1      | RO3G_08440.1 | RO3G_00316.1 | 266  | 171  | 87.13 |
| 1168075      | 1169404     | 804010  | 805187  | 1  | 1       | RO3G_08444.1 | RO3G_00319.1 | 313  | 226  | 64.6  |
| 1171385      | 1173157     | 805880  | 807634  | 1  | 1       | RO3G_08446.1 | RO3G_00320.1 | 486  | 524  | 56.87 |
| ##Scaffold_6 | Scaffold_1  | 1097154 | 1113858 | 1  | 811849  | 822129       | -1           | 3    |      |       |
| 1113209      | 1113858     | 811849  | 813439  | -1 | 1       | RO3G_08424.1 | RO3G_00324.1 | 166  | 135  | 57.78 |
| 1102415      | 1104643     | 816074  | 817733  | 1  | -1      | RO3G_08421.1 | RO3G_00326.1 | 547  | 515  | 58.25 |
| 1097154      | 1098805     | 820465  | 822129  | 1  | -1      | RO3G_08419.1 | RO3G_00329.1 | 735  | 422  | 91.94 |
| ##Scaffold_6 | Scaffold_1  | 1198522 | 1217859 | 1  | 935161  | 969261       | 1            | 5    |      |       |
| 1198522      | 1199378     | 935161  | 935913  | -1 | -1      | RO3G_08459.1 | RO3G_00379.1 | 255  | 201  | 68.16 |
| 1204967      | 1206097     | 942750  | 943529  | 1  | 1       | RO3G_08461.1 | RO3G_00383.1 | 385  | 242  | 72.31 |
| 1207551      | 1209769     | 955533  | 957527  | -1 | -1      | RO3G_08462.1 | RO3G_00389.1 | 496  | 434  | 59.91 |
| 1210170      | 1212004     | 958010  | 959884  | -1 | -1      | RO3G_08463.1 | RO3G_00390.1 | 594  | 513  | 66.86 |
| 1216779      | 1217859     | 968827  | 969261  | -1 | -1      | RO3G_08466.1 | RO3G_00393.1 | 185  | 94   | 95.74 |
| ##Scaffold_6 | Scaffold_13 | 1916606 | 1922587 | 13 | 502896  | 509705       | 1            | 3    |      |       |
| 1916606      | 1917925     | 502896  | 504383  | 1  | 1       | RO3G_08757.1 | RO3G_14049.1 | 412  | 449  | 53.67 |
| 1918295      | 1920542     | 504726  | 506688  | -1 | -1      | RO3G_08758.1 | RO3G_14050.1 | 608  | 594  | 56.9  |
| 1921163      | 1922587     | 508176  | 509705  | -1 | -1      | RO3G_08759.1 | RO3G_14051.1 | 649  | 409  | 82.89 |
| ##Scaffold_6 | Scaffold_14 | 2383810 | 2408188 | 14 | 365178  | 380263       | -1           | 3    |      |       |
| 2406783      | 2408188     | 365178  | 366589  | 1  | -1      | RO3G_08940.1 | RO3G_14478.1 | 795  | 435  | 95.86 |
| 2399857      | 2400995     | 374033  | 375162  | 1  | -1      | RO3G_08936.1 | RO3G_14483.1 | 642  | 317  | 96.85 |
| 2383810      | 2384468     | 379649  | 380263  | -1 | 1       | RO3G_08929.1 | RO3G_14486.1 | 191  | 194  | 56.19 |
| ##Scaffold_6 | Scaffold_15 | 49667   | 75799   | 15 | 794944  | 824904       | 1            | 7    |      |       |
| 49667        | 50470       | 794944  | 795784  | 1  | 1       | RO3G_08000.1 | RO3G_15091.1 | 258  | 166  | 95.78 |
| 50670        | 52247       | 796148  | 797733  | -1 | -1      | RO3G_08001.1 | RO3G_15092.1 | 542  | 396  | 77.53 |
| 58323        | 58986       | 807256  | 807904  | -1 | -1      | RO3G_08003.1 | RO3G_15095.1 | 300  | 146  | 98.63 |
| 59618        | 61789       | 810800  | 814260  | -1 | -1      | RO3G_08004.1 | RO3G_15097.1 | 369  | 486  | 45.88 |
| 66007        | 67073       | 818653  | 819508  | -1 | -1      | RO3G_08006.1 | RO3G_15098.1 | 124  | 135  | 47.41 |
| 67963        | 69054       | 820188  | 820857  | -1 | -1      | RO3G_08007.1 | RO3G_15100.1 | 235  | 168  | 70.24 |
| 73434        | 75799       | 822675  | 824904  | 1  | 1       | RO3G_08009.1 | RO3G_15101.1 | 748  | 690  | 61.16 |
| ##Scaffold_6 | Scaffold_15 | 136087  | 145311  | 15 | 1063985 | 1076231      | 1            | 3    |      |       |
| 136087       | 137209      | 1063985 | 1065205 | 1  | 1       | RO3G_08033.1 | RO3G_15197.1 | 538  | 327  | 84.4  |
| 139777       | 142178      | 1065520 | 1066497 | -1 | -1      | RO3G_08035.1 | RO3G_15198.1 | 336  | 235  | 78.3  |
| 144350       | 145311      | 1074433 | 1076231 | -1 | -1      | RO3G_08037.1 | RO3G_15202.1 | 412  | 249  | 85.14 |
| ##Scaffold_6 | Scaffold_20 | 691599  | 726870  | 20 | 105145  | 146536       | -1           | 7    |      |       |
| 725182       | 726870      | 105145  | 106833  | 1  | -1      | RO3G_08262.1 | RO3G_16396.1 | 949  | 501  | 99.6  |
| 721416       | 722149      | 107283  | 108021  | -1 | 1       | RO3G_08261.1 | RO3G_16397.1 | 292  | 163  | 93.25 |
| 715288       | 715727      | 113910  | 114352  | 1  | -1      | RO3G_08258.1 | RO3G_16401.1 | 119  | 108  | 96.3  |
| 712898       | 714374      | 117450  | 118175  | 1  | -1      | RO3G_08257.1 | RO3G_16403.1 | 393  | 198  | 95.96 |
| 706380       | 707642      | 133426  | 134692  | 1  | -1      | RO3G_08255.1 | RO3G_16410.1 | 703  | 383  | 89.3  |
| 700869       | 701742      | 135696  | 136510  | 1  | -1      | RO3G_08253.1 | RO3G_16411.1 | 281  | 263  | 69.58 |
| 691599       | 693184      | 145063  | 146536  | -1 | 1       | RO3G_08248.1 | RO3G_16415.1 | 545  | 426  | 68.08 |
| ##Scaffold_6 | Scaffold_20 | 634044  | 685109  | 20 | 198253  | 215758       | -1           | 6    |      |       |
| 684246       | 685109      | 198253  | 199127  | -1 | 1       | RO3G_08245.1 | RO3G_16436.1 | 262  | 195  | 76.92 |
| 676705       | 677720      | 202056  | 203600  | -1 | 1       | RO3G_08242.1 | RO3G_16438.1 | 409  | 245  | 80.82 |
| 675360       | 676376      | 204120  | 206009  | 1  | -1      | RO3G_08241.1 | RO3G_16439.1 | 213  | 154  | 85.71 |
| 642879       | 643879      | 208447  | 209587  | -1 | 1       | RO3G_08225.1 | RO3G_16440.1 | 389  | 241  | 79.25 |
| 634994       | 635305      | 214452  | 214763  | 1  | -1      | RO3G_08219.1 | RO3G_16444.1 | 162  | 82   | 100   |
| 634044       | 634454      | 215348  | 215758  | -1 | 1       | RO3G_08218.1 | RO3G_16445.1 | 262  | 136  | 100   |
| ##Scaffold_6 | Scaffold_24 | 2619607 | 2670621 | 24 | 178834  | 222655       | -1           | 9    |      |       |
| 2667679      | 2670621     | 178834  | 181803  | 1  | -1      | RO3G_09029.1 | RO3G_16993.1 | 695  | 629  | 65.98 |
| 2664468      | 2667379     | 182117  | 185302  | 1  | -1      | RO3G_09028.1 | RO3G_16994.1 | 722  | 450  | 80.67 |
| 2658432      | 2660888     | 186161  | 188668  | 1  | -1      | RO3G_09026.1 | RO3G_16995.1 | 1105 | 702  | 75.07 |
| 2656466      | 2656765     | 190476  | 190780  | -1 | 1       | RO3G_09025.1 | RO3G_16996.1 | 150  | 82   | 90.24 |
| 2651250      | 2652179     | 192743  | 193672  | -1 | 1       | RO3G_09023.1 | RO3G_16997.1 | 476  | 309  | 99.03 |



|              |             |         |         |    |         |              |              |      |      |       |
|--------------|-------------|---------|---------|----|---------|--------------|--------------|------|------|-------|
| 2649300      | 2650923     | 194278  | 196446  | 1  | -1      | RO3G_09022.1 | RO3G_16998.1 | 471  | 372  | 65.59 |
| 2641179      | 2646492     | 197028  | 202786  | 1  | -1      | RO3G_09020.1 | RO3G_16999.1 | 887  | 1510 | 41.99 |
| 2626427      | 2627000     | 213247  | 214194  | -1 | 1       | RO3G_09016.1 | RO3G_17002.1 | 174  | 138  | 57.25 |
| 2619607      | 2620427     | 221828  | 222655  | -1 | 1       | RO3G_09012.1 | RO3G_17006.1 | 451  | 224  | 100   |
| ##Scaffold_6 | Scaffold_9  | 247663  | 272049  | 9  | 2196634 | 2211154      | 1            | 4    |      |       |
| 247663       | 248670      | 2196634 | 2197692 | -1 | -1      | RO3G_08083.1 | RO3G_11915.1 | 392  | 346  | 73.7  |
| 257653       | 258457      | 2202388 | 2202852 | -1 | -1      | RO3G_08086.1 | RO3G_11918.1 | 115  | 109  | 48.62 |
| 265599       | 267128      | 2207027 | 2209342 | 1  | 1       | RO3G_08089.1 | RO3G_11920.1 | 535  | 348  | 72.99 |
| 270284       | 272049      | 2209539 | 2211154 | -1 | -1      | RO3G_08092.1 | RO3G_11921.1 | 630  | 418  | 78.95 |
| ##Scaffold_6 | Scaffold_9  | 1314169 | 1355311 | 9  | 1882142 | 1915557      | 1            | 9    |      |       |
| 1314169      | 1315047     | 1882142 | 1883447 | -1 | -1      | RO3G_08506.1 | RO3G_11792.1 | 268  | 190  | 67.37 |
| 1318701      | 1319636     | 1883982 | 1884886 | 1  | 1       | RO3G_08508.1 | RO3G_11793.1 | 126  | 171  | 46.2  |
| 1320005      | 1321434     | 1889291 | 1889969 | -1 | -1      | RO3G_08509.1 | RO3G_11795.1 | 193  | 139  | 74.1  |
| 1325177      | 1326111     | 1900102 | 1901037 | 1  | 1       | RO3G_08513.1 | RO3G_11799.1 | 442  | 274  | 100   |
| 1327643      | 1328242     | 1903469 | 1904016 | 1  | 1       | RO3G_08515.1 | RO3G_11801.1 | 182  | 103  | 88.35 |
| 1332049      | 1333081     | 1904969 | 1905874 | 1  | 1       | RO3G_08517.1 | RO3G_11802.1 | 522  | 260  | 98.85 |
| 1349167      | 1351583     | 1909499 | 1911669 | -1 | -1      | RO3G_08525.1 | RO3G_11804.1 | 579  | 388  | 78.87 |
| 1352064      | 1353258     | 1912809 | 1914068 | -1 | -1      | RO3G_08526.1 | RO3G_11805.1 | 688  | 358  | 92.18 |
| 1354061      | 1355311     | 1914650 | 1915557 | -1 | -1      | RO3G_08527.1 | RO3G_11806.1 | 259  | 157  | 80.89 |
| ##Scaffold_6 | Scaffold_9  | 1445802 | 1502760 | 9  | 1951535 | 1982241      | 1            | 5    |      |       |
| 1445802      | 1446401     | 1951535 | 1952176 | 1  | 1       | RO3G_08564.1 | RO3G_11819.1 | 220  | 213  | 60.56 |
| 1447309      | 1448271     | 1957828 | 1959492 | -1 | -1      | RO3G_08565.1 | RO3G_11822.1 | 387  | 367  | 59.95 |
| 1449895      | 1450815     | 1960504 | 1961491 | -1 | -1      | RO3G_08566.1 | RO3G_11823.1 | 229  | 283  | 58.66 |
| 1468461      | 1470351     | 1967429 | 1969116 | 1  | 1       | RO3G_08575.1 | RO3G_11826.1 | 595  | 450  | 67.78 |
| 1499908      | 1502760     | 1979475 | 1982241 | 1  | 1       | RO3G_08587.1 | RO3G_11831.1 | 852  | 823  | 62.45 |
| ##Scaffold_6 | Scaffold_9  | 1390817 | 1421557 | 9  | 1995584 | 2007251      | -1           | 6    |      |       |
| 1420628      | 1421557     | 1995584 | 1996512 | 1  | -1      | RO3G_08555.1 | RO3G_11836.1 | 341  | 234  | 82.48 |
| 1411759      | 1412190     | 1999153 | 1999588 | 1  | -1      | RO3G_08551.1 | RO3G_11838.1 | 134  | 83   | 84.34 |
| 1401921      | 1402850     | 2000727 | 2002522 | 1  | -1      | RO3G_08547.1 | RO3G_11839.1 | 100  | 131  | 42.75 |
| 1395891      | 1396934     | 2003060 | 2004089 | 1  | -1      | RO3G_08543.1 | RO3G_11840.1 | 425  | 269  | 89.96 |
| 1393678      | 1394387     | 2005182 | 2005977 | -1 | 1       | RO3G_08541.1 | RO3G_11841.1 | 185  | 137  | 61.31 |
| 1390817      | 1391851     | 2006522 | 2007251 | 1  | -1      | RO3G_08540.1 | RO3G_11842.1 | 101  | 154  | 57.79 |
| ##Scaffold_6 | Scaffold_9  | 1475025 | 1494594 | 9  | 2066991 | 2085975      | -1           | 3    |      |       |
| 1492129      | 1494594     | 2066991 | 2069446 | -1 | 1       | RO3G_08585.1 | RO3G_11870.1 | 1286 | 787  | 85.39 |
| 1485431      | 1489226     | 2071898 | 2075695 | 1  | -1      | RO3G_08583.1 | RO3G_11872.1 | 1624 | 1235 | 65.18 |
| 1475025      | 1475585     | 2085415 | 2085975 | 1  | -1      | RO3G_08578.1 | RO3G_11878.1 | 363  | 186  | 100   |
| ##Scaffold_6 | Scaffold_9  | 1760063 | 1771191 | 9  | 1763038 | 1768992      | -1           | 3    |      |       |
| 1769935      | 1771191     | 1763038 | 1764265 | 1  | -1      | RO3G_08703.1 | RO3G_11748.1 | 527  | 337  | 88.13 |
| 1766419      | 1769488     | 1764690 | 1767481 | 1  | -1      | RO3G_08702.1 | RO3G_11749.1 | 722  | 740  | 55.27 |
| 1760063      | 1760308     | 1768747 | 1768992 | -1 | 1       | RO3G_08699.1 | RO3G_11750.1 | 134  | 80   | 76.25 |
| ##Scaffold_7 | Scaffold_1  | 616962  | 648491  | 1  | 2357046 | 2395646      | 1            | 7    |      |       |
| 616962       | 618451      | 2357046 | 2358601 | -1 | -1      | RO3G_09434.1 | RO3G_00928.1 | 313  | 335  | 51.04 |
| 621022       | 622099      | 2362777 | 2363787 | 1  | 1       | RO3G_09435.1 | RO3G_00930.1 | 146  | 176  | 50.57 |
| 625083       | 625598      | 2377959 | 2378477 | -1 | -1      | RO3G_09437.1 | RO3G_00935.1 | 182  | 172  | 66.86 |
| 632491       | 633266      | 2381629 | 2382382 | -1 | -1      | RO3G_09441.1 | RO3G_00937.1 | 329  | 194  | 84.54 |
| 638102       | 638791      | 2383673 | 2384366 | 1  | 1       | RO3G_09443.1 | RO3G_00938.1 | 227  | 129  | 100   |
| 642076       | 643556      | 2386729 | 2388117 | 1  | 1       | RO3G_09445.1 | RO3G_00940.1 | 225  | 159  | 78.62 |
| 647547       | 648491      | 2394231 | 2395646 | 1  | 1       | RO3G_09448.1 | RO3G_00944.1 | 127  | 301  | 33.55 |
| ##Scaffold_7 | Scaffold_1  | 693558  | 704247  | 1  | 1988610 | 2001432      | 1            | 4    |      |       |
| 693558       | 694330      | 1988610 | 1989401 | -1 | -1      | RO3G_09466.1 | RO3G_00782.1 | 262  | 139  | 97.12 |
| 696908       | 697807      | 1990975 | 1992436 | 1  | 1       | RO3G_09467.1 | RO3G_00784.1 | 348  | 241  | 71.78 |
| 700677       | 702201      | 1996455 | 1998262 | -1 | -1      | RO3G_09469.1 | RO3G_00787.1 | 806  | 459  | 89.11 |
| 702821       | 704247      | 1999999 | 2001432 | -1 | -1      | RO3G_09470.1 | RO3G_00788.1 | 908  | 458  | 94.32 |
| ##Scaffold_7 | Scaffold_1  | 709382  | 719654  | 1  | 2829063 | 2837823      | 1            | 3    |      |       |
| 709382       | 710410      | 2829063 | 2830103 | 1  | 1       | RO3G_09474.1 | RO3G_01119.1 | 427  | 357  | 68.63 |
| 711026       | 712238      | 2830284 | 2831463 | 1  | 1       | RO3G_09475.1 | RO3G_01120.1 | 506  | 355  | 72.39 |
| 717503       | 719654      | 2835635 | 2837823 | 1  | 1       | RO3G_09477.1 | RO3G_01122.1 | 939  | 546  | 87    |
| ##Scaffold_7 | Scaffold_10 | 1612814 | 1632916 | 10 | 1414910 | 1426497      | -1           | 4    |      |       |
| 1632073      | 1632916     | 1414910 | 1415732 | -1 | 1       | RO3G_09817.1 | RO3G_12499.1 | 377  | 190  | 95.26 |
| 1626622      | 1627394     | 1419154 | 1419905 | 1  | -1      | RO3G_09814.1 | RO3G_12500.1 | 200  | 190  | 53.68 |
| 1614670      | 1615725     | 1423894 | 1424946 | -1 | 1       | RO3G_09808.1 | RO3G_12503.1 | 130  | 325  | 34.15 |
| 1612814      | 1613998     | 1425290 | 1426497 | -1 | 1       | RO3G_09807.1 | RO3G_12504.1 | 326  | 262  | 64.5  |
| ##Scaffold_7 | Scaffold_11 | 968739  | 983700  | 11 | 455270  | 467845       | 1            | 4    |      |       |
| 968739       | 971172      | 455270  | 457630  | -1 | -1      | RO3G_09565.1 | RO3G_12847.1 | 597  | 716  | 54.47 |
| 975546       | 976061      | 460827  | 461661  | 1  | 1       | RO3G_09567.1 | RO3G_12849.1 | 282  | 146  | 93.84 |
| 979475       | 980824      | 463814  | 465216  | 1  | 1       | RO3G_09569.1 | RO3G_12852.1 | 464  | 323  | 76.47 |
| 982544       | 983700      | 466206  | 467845  | -1 | -1      | RO3G_09570.1 | RO3G_12853.1 | 274  | 211  | 70.14 |

|              |             |         |         |    |         |              |              |      |      |       |  |
|--------------|-------------|---------|---------|----|---------|--------------|--------------|------|------|-------|--|
| ##Scaffold_7 | Scaffold_11 | 2012829 | 2040537 | 11 | 793284  | 825051       | 1            | 5    |      |       |  |
| 2012829      | 2014011     | 793284  | 794731  | -1 | -1      | RO3G_09971.1 | RO3G_12983.1 | 332  | 251  | 69.32 |  |
| 2017609      | 2018681     | 798438  | 800350  | -1 | -1      | RO3G_09974.1 | RO3G_12984.1 | 347  | 299  | 66.56 |  |
| 2021520      | 2022797     | 810030  | 811428  | 1  | 1       | RO3G_09976.1 | RO3G_12988.1 | 351  | 344  | 51.74 |  |
| 2024581      | 2025308     | 812979  | 813735  | 1  | 1       | RO3G_09978.1 | RO3G_12989.1 | 329  | 233  | 81.55 |  |
| 2039276      | 2040537     | 824237  | 825051  | 1  | 1       | RO3G_09984.1 | RO3G_12994.1 | 330  | 196  | 80.1  |  |
| ##Scaffold_7 | Scaffold_11 | 2118455 | 2140017 | 11 | 1051541 | 1077070      | 1            | 7    |      |       |  |
| 2118455      | 2119687     | 1051541 | 1053088 | -1 | -1      | RO3G_10020.1 | RO3G_13078.1 | 287  | 242  | 64.46 |  |
| 2122455      | 2124043     | 1055117 | 1055825 | 1  | 1       | RO3G_10022.1 | RO3G_13080.1 | 224  | 165  | 70.3  |  |
| 2124465      | 2125731     | 1057973 | 1059248 | 1  | 1       | RO3G_10023.1 | RO3G_13082.1 | 559  | 333  | 97.3  |  |
| 2126301      | 2126825     | 1059818 | 1060344 | 1  | 1       | RO3G_10024.1 | RO3G_13083.1 | 221  | 139  | 98.56 |  |
| 2135249      | 2135774     | 1067739 | 1068272 | 1  | 1       | RO3G_10028.1 | RO3G_13087.1 | 300  | 155  | 92.9  |  |
| 2136755      | 2137687     | 1070052 | 1070958 | -1 | -1      | RO3G_10030.1 | RO3G_13088.1 | 186  | 287  | 42.86 |  |
| 2138601      | 2140017     | 1074801 | 1077070 | -1 | -1      | RO3G_10031.1 | RO3G_13089.1 | 470  | 335  | 71.34 |  |
| ##Scaffold_7 | Scaffold_11 | 2210606 | 2234153 | 11 | 1099966 | 1144592      | 1            | 5    |      |       |  |
| 2210606      | 2211915     | 1099966 | 1101185 | -1 | -1      | RO3G_10055.1 | RO3G_13097.1 | 568  | 336  | 92.86 |  |
| 2213341      | 2216911     | 1109666 | 1113621 | -1 | -1      | RO3G_10056.1 | RO3G_13100.1 | 1696 | 1072 | 76.87 |  |
| 2223968      | 2225736     | 1129970 | 1131967 | 1  | 1       | RO3G_10059.1 | RO3G_13109.1 | 730  | 561  | 72.37 |  |
| 2229823      | 2232101     | 1137472 | 1139778 | 1  | 1       | RO3G_10063.1 | RO3G_13112.1 | 1252 | 687  | 91.7  |  |
| 2233074      | 2234153     | 1143698 | 1144592 | 1  | 1       | RO3G_10064.1 | RO3G_13115.1 | 124  | 173  | 59.54 |  |
| ##Scaffold_7 | Scaffold_11 | 2448038 | 2475124 | 11 | 920889  | 965346       | -1           | 5    |      |       |  |
| 2471185      | 2475124     | 920889  | 923845  | 1  | -1      | RO3G_10152.1 | RO3G_13032.1 | 976  | 834  | 63.07 |  |
| 2464669      | 2470275     | 926036  | 930545  | -1 | 1       | RO3G_10151.1 | RO3G_13033.1 | 2404 | 1422 | 84.46 |  |
| 2459195      | 2460075     | 945093  | 946170  | -1 | 1       | RO3G_10149.1 | RO3G_13037.1 | 125  | 95   | 68.42 |  |
| 2454580      | 2456418     | 954473  | 956342  | 1  | -1      | RO3G_10147.1 | RO3G_13040.1 | 882  | 515  | 82.52 |  |
| 2448038      | 2450884     | 962538  | 965346  | -1 | 1       | RO3G_10145.1 | RO3G_13043.1 | 933  | 754  | 65.52 |  |
| ##Scaffold_7 | Scaffold_16 | 1816719 | 1822141 | 16 | 73424   | 81438        | -1           | 3    |      |       |  |
| 1821281      | 1822141     | 73424   | 74818   | -1 | 1       | RO3G_09900.1 | RO3G_15299.1 | 172  | 184  | 50    |  |
| 1818096      | 1818892     | 79058   | 79832   | -1 | -1      | RO3G_09898.1 | RO3G_15303.1 | 327  | 181  | 96.13 |  |
| 1816719      | 1817559     | 80070   | 81438   | -1 | 1       | RO3G_09897.1 | RO3G_15304.1 | 140  | 147  | 48.98 |  |
| ##Scaffold_7 | Scaffold_16 | 2294371 | 2335446 | 16 | 172916  | 195670       | -1           | 4    |      |       |  |
| 2333558      | 2335446     | 172916  | 174785  | -1 | 1       | RO3G_10106.1 | RO3G_15341.1 | 912  | 608  | 76.97 |  |
| 2330152      | 2331229     | 177558  | 178611  | -1 | -1      | RO3G_10104.1 | RO3G_15344.1 | 358  | 283  | 63.96 |  |
| 2301045      | 2301635     | 190722  | 191304  | -1 | 1       | RO3G_10092.1 | RO3G_15350.1 | 252  | 156  | 99.36 |  |
| 2294371      | 2295525     | 194535  | 195670  | 1  | -1      | RO3G_10088.1 | RO3G_15353.1 | 566  | 357  | 84.87 |  |
| ##Scaffold_7 | Scaffold_16 | 2592608 | 2606585 | 16 | 441913  | 448830       | -1           | 4    |      |       |  |
| 2605138      | 2606585     | 441913  | 443381  | -1 | 1       | RO3G_10204.1 | RO3G_15450.1 | 697  | 442  | 80.77 |  |
| 2603304      | 2604495     | 443523  | 445351  | -1 | -1      | RO3G_10202.1 | RO3G_15451.1 | 312  | 371  | 65.77 |  |
| 2594894      | 2595745     | 445524  | 446394  | -1 | 1       | RO3G_10200.1 | RO3G_15452.1 | 400  | 220  | 93.18 |  |
| 2592608      | 2593733     | 446699  | 448830  | -1 | 1       | RO3G_10199.1 | RO3G_15453.1 | 451  | 372  | 75.54 |  |
| ##Scaffold_7 | Scaffold_17 | 1176114 | 1190977 | 17 | 557639  | 581860       | -1           | 6    |      |       |  |
| 1190228      | 1190977     | 557639  | 558541  | -1 | 1       | RO3G_09651.1 | RO3G_15790.1 | 390  | 250  | 90.4  |  |
| 1187256      | 1190005     | 558764  | 561513  | -1 | 1       | RO3G_09650.1 | RO3G_15791.1 | 1667 | 843  | 100   |  |
| 1185097      | 1187100     | 562193  | 563638  | 1  | -1      | RO3G_09649.1 | RO3G_15792.1 | 343  | 294  | 65.65 |  |
| 1181276      | 1181920     | 571382  | 573097  | -1 | 1       | RO3G_09646.1 | RO3G_15796.1 | 128  | 149  | 55.03 |  |
| 1179905      | 1180999     | 573253  | 574377  | -1 | 1       | RO3G_09645.1 | RO3G_15797.1 | 402  | 241  | 100   |  |
| 1176114      | 1177740     | 580229  | 581860  | -1 | 1       | RO3G_09643.1 | RO3G_15800.1 | 750  | 543  | 81.4  |  |
| ##Scaffold_7 | Scaffold_2  | 1332331 | 1365677 | 2  | 4260288 | 4281878      | 1            | 3    |      |       |  |
| 1332331      | 1334962     | 4260288 | 4265748 | -1 | -1      | RO3G_09709.1 | RO3G_03905.1 | 1227 | 833  | 73.47 |  |
| 1340520      | 1341984     | 4267813 | 4269291 | -1 | -1      | RO3G_09711.1 | RO3G_03906.1 | 663  | 370  | 91.89 |  |
| 1364389      | 1365677     | 4280954 | 4281878 | 1  | 1       | RO3G_09721.1 | RO3G_03909.1 | 253  | 341  | 63.05 |  |
| ##Scaffold_7 | Scaffold_2  | 1579272 | 1589905 | 2  | 4745194 | 4755888      | 1            | 4    |      |       |  |
| 1579272      | 1582504     | 4745194 | 4748425 | -1 | -1      | RO3G_09793.1 | RO3G_04076.1 | 1281 | 836  | 80.5  |  |
| 1582997      | 1583916     | 4750392 | 4751310 | 1  | 1       | RO3G_09794.1 | RO3G_04077.1 | 485  | 268  | 86.94 |  |
| 1584589      | 1586505     | 4753157 | 4753915 | 1  | 1       | RO3G_09795.1 | RO3G_04078.1 | 404  | 247  | 80.16 |  |
| 1588627      | 1589905     | 4754622 | 4755888 | -1 | -1      | RO3G_09797.1 | RO3G_04079.1 | 757  | 388  | 91.49 |  |
| ##Scaffold_7 | Scaffold_3  | 282766  | 306127  | 3  | 286376  | 305024       | -1           | 5    |      |       |  |
| 303766       | 306127      | 286376  | 288723  | 1  | -1      | RO3G_09309.1 | RO3G_04323.1 | 1295 | 723  | 92.53 |  |
| 300702       | 303036      | 288974  | 291845  | -1 | -1      | RO3G_09308.1 | RO3G_04324.1 | 821  | 678  | 78.91 |  |
| 297152       | 297511      | 296400  | 296389  | 1  | 1       | RO3G_09306.1 | RO3G_04326.1 | 141  | 101  | 91.09 |  |
| 292377       | 292950      | 300900  | 301470  | -1 | -1      | RO3G_09303.1 | RO3G_04330.1 | 125  | 156  | 65.38 |  |
| 282766       | 285909      | 302197  | 305024  | -1 | 1       | RO3G_09301.1 | RO3G_04331.1 | 847  | 990  | 53.03 |  |
| ##Scaffold_7 | Scaffold_4  | 2087308 | 2113149 | 4  | 2237170 | 2259379      | 1            | 5    |      |       |  |
| 2087308      | 2088384     | 2237170 | 2238048 | -1 | -1      | RO3G_10005.1 | RO3G_06324.1 | 437  | 258  | 80.62 |  |
| 2092357      | 2093959     | 2248149 | 2250337 | -1 | -1      | RO3G_10007.1 | RO3G_06329.1 | 542  | 382  | 78.8  |  |
| 2098919      | 2099682     | 2251485 | 2252431 | -1 | -1      | RO3G_10009.1 | RO3G_06330.1 | 239  | 167  | 73.65 |  |
| 2106809      | 2107377     | 2255946 | 2256559 | -1 | -1      | RO3G_10014.1 | RO3G_06332.1 | 214  | 106  | 100   |  |
| 2112741      | 2113149     | 2258902 | 2259379 | 1  | 1       | RO3G_10017.1 | RO3G_06334.1 | 150  | 138  | 68.84 |  |

|              |             |         |         |    |         |              |              |      |      |       |  |
|--------------|-------------|---------|---------|----|---------|--------------|--------------|------|------|-------|--|
| ##Scaffold_7 | Scaffold_4  | 2238609 | 2265050 | 4  | 2206181 | 2226869      | -1           | 5    |      |       |  |
| 2264274      | 2265050     | 2206181 | 2206836 | -1 | 1       | RO3G_10076.1 | RO3G_06314.1 | 197  | 126  | 79.37 |  |
| 2255156      | 2257614     | 2210621 | 2213295 | -1 | 1       | RO3G_10073.1 | RO3G_06317.1 | 576  | 700  | 51.43 |  |
| 2253998      | 2254792     | 2213649 | 2214453 | 1  | -1      | RO3G_10072.1 | RO3G_06318.1 | 320  | 176  | 83.52 |  |
| 2243731      | 2245458     | 2222477 | 2225136 | -1 | 1       | RO3G_10068.1 | RO3G_06320.1 | 423  | 459  | 55.77 |  |
| 2238609      | 2239784     | 2225710 | 2226869 | -1 | 1       | RO3G_10066.1 | RO3G_06321.1 | 520  | 326  | 84.05 |  |
| ##Scaffold_8 | Scaffold_1  | 1292334 | 1312917 | 1  | 4065932 | 4085664      | 1            | 4    |      |       |  |
| 1292334      | 1293342     | 4065932 | 4066982 | -1 | -1      | RO3G_10690.1 | RO3G_01567.1 | 315  | 321  | 52.96 |  |
| 1293689      | 1295221     | 4069170 | 4070147 | -1 | -1      | RO3G_10691.1 | RO3G_01568.1 | 173  | 239  | 47.7  |  |
| 1308108      | 1310699     | 4080081 | 4082695 | 1  | 1       | RO3G_10698.1 | RO3G_01572.1 | 1269 | 729  | 89.85 |  |
| 1312075      | 1312917     | 4084840 | 4085664 | -1 | -1      | RO3G_10700.1 | RO3G_01575.1 | 375  | 233  | 78.97 |  |
| ##Scaffold_8 | Scaffold_11 | 403706  | 485261  | 11 | 532841  | 596893       | -1           | 8    |      |       |  |
| 483336       | 485261      | 532841  | 534853  | 1  | -1      | RO3G_10408.1 | RO3G_12883.1 | 1023 | 536  | 95.9  |  |
| 477475       | 477184      | 535833  | 538644  | 1  | -1      | RO3G_10406.1 | RO3G_12884.1 | 886  | 661  | 77.31 |  |
| 458934       | 460909      | 547449  | 549439  | 1  | -1      | RO3G_10403.1 | RO3G_12888.1 | 1092 | 610  | 97.21 |  |
| 451193       | 457439      | 553556  | 559848  | 1  | -1      | RO3G_10401.1 | RO3G_12891.1 | 2891 | 1959 | 78.76 |  |
| 431233       | 433002      | 568351  | 570212  | 1  | -1      | RO3G_10395.1 | RO3G_12896.1 | 786  | 526  | 72.05 |  |
| 419537       | 421758      | 575026  | 577107  | -1 | 1       | RO3G_10391.1 | RO3G_12898.1 | 801  | 619  | 66.07 |  |
| 418629       | 419373      | 577171  | 577924  | 1  | -1      | RO3G_10390.1 | RO3G_12899.1 | 187  | 152  | 63.82 |  |
| 403706       | 404966      | 595611  | 596893  | -1 | 1       | RO3G_10385.1 | RO3G_12908.1 | 522  | 314  | 80.57 |  |
| ##Scaffold_8 | Scaffold_11 | 387225  | 397690  | 11 | 691772  | 697662       | 1            | 3    |      |       |  |
| 387225       | 387815      | 691772  | 692352  | 1  | 1       | RO3G_10377.1 | RO3G_12944.1 | 323  | 159  | 98.11 |  |
| 395750       | 396437      | 695570  | 696612  | 1  | 1       | RO3G_10382.1 | RO3G_12946.1 | 273  | 187  | 71.12 |  |
| 396790       | 397690      | 696945  | 697662  | -1 | -1      | RO3G_10383.1 | RO3G_12947.1 | 375  | 219  | 86.3  |  |
| ##Scaffold_8 | Scaffold_11 | 556378  | 581483  | 11 | 83661   | 120048       | -1           | 5    |      |       |  |
| 580470       | 581483      | 83661   | 86114   | -1 | 1       | RO3G_10445.1 | RO3G_12696.1 | 278  | 326  | 50.31 |  |
| 574702       | 577051      | 95501   | 97828   | -1 | 1       | RO3G_10443.1 | RO3G_12701.1 | 1173 | 659  | 86.34 |  |
| 567051       | 568798      | 99754   | 101281  | 1  | -1      | RO3G_10440.1 | RO3G_12703.1 | 710  | 539  | 72.91 |  |
| 564463       | 565240      | 104534  | 105426  | 1  | -1      | RO3G_10439.1 | RO3G_12705.1 | 237  | 202  | 60.4  |  |
| 556378       | 557527      | 118901  | 120048  | 1  | -1      | RO3G_10435.1 | RO3G_12710.1 | 519  | 294  | 85.71 |  |
| ##Scaffold_8 | Scaffold_18 | 316233  | 338714  | 18 | 274725  | 301352       | -1           | 3    |      |       |  |
| 338202       | 338714      | 274725  | 275378  | 1  | -1      | RO3G_10362.1 | RO3G_15979.1 | 221  | 172  | 70.35 |  |
| 319361       | 322163      | 290919  | 292995  | 1  | -1      | RO3G_10355.1 | RO3G_15987.1 | 856  | 535  | 82.24 |  |
| 316233       | 317748      | 299948  | 301352  | 1  | -1      | RO3G_10354.1 | RO3G_15990.1 | 546  | 449  | 67.26 |  |
| ##Scaffold_8 | Scaffold_2  | 705107  | 712714  | 2  | 4540444 | 4551445      | 1            | 3    |      |       |  |
| 705107       | 705734      | 4540444 | 4541082 | -1 | -1      | RO3G_10491.1 | RO3G_04000.1 | 365  | 191  | 99.48 |  |
| 709779       | 710185      | 4547685 | 4548535 | 1  | 1       | RO3G_10493.1 | RO3G_04002.1 | 128  | 121  | 59.5  |  |
| 711103       | 712714      | 4548933 | 4551445 | 1  | 1       | RO3G_10494.1 | RO3G_04003.1 | 189  | 170  | 57.65 |  |
| ##Scaffold_8 | Scaffold_2  | 985593  | 990263  | 2  | 2129349 | 2135611      | 1            | 3    |      |       |  |
| 985593       | 986662      | 2129349 | 2130444 | 1  | 1       | RO3G_10591.1 | RO3G_03043.1 | 430  | 281  | 71.89 |  |
| 987413       | 987919      | 2130574 | 2131077 | 1  | 1       | RO3G_10592.1 | RO3G_03044.1 | 219  | 168  | 67.26 |  |
| 989674       | 990263      | 2134936 | 2135611 | -1 | -1      | RO3G_10593.1 | RO3G_03047.1 | 166  | 195  | 53.33 |  |
| ##Scaffold_8 | Scaffold_2  | 1100145 | 1112456 | 2  | 2050725 | 2066473      | 1            | 3    |      |       |  |
| 1100145      | 1101283     | 2050725 | 2051884 | 1  | 1       | RO3G_10625.1 | RO3G_03011.1 | 380  | 347  | 71.76 |  |
| 1105497      | 1108957     | 2056112 | 2058511 | -1 | -1      | RO3G_10627.1 | RO3G_03013.1 | 659  | 867  | 50.75 |  |
| 1111005      | 1112456     | 2065297 | 2066473 | 1  | 1       | RO3G_10629.1 | RO3G_03017.1 | 137  | 323  | 33.13 |  |
| ##Scaffold_8 | Scaffold_2  | 1083214 | 1088365 | 2  | 2104655 | 2110144      | 1            | 3    |      |       |  |
| 1083214      | 1084378     | 2104655 | 2107445 | 1  | 1       | RO3G_10618.1 | RO3G_03032.1 | 384  | 406  | 59.11 |  |
| 1085112      | 1085893     | 2107483 | 2108428 | -1 | -1      | RO3G_10619.1 | RO3G_03033.1 | 315  | 190  | 85.26 |  |
| 1086016      | 1088365     | 2108740 | 2110144 | -1 | -1      | RO3G_10620.1 | RO3G_03034.1 | 653  | 403  | 79.9  |  |
| ##Scaffold_8 | Scaffold_2  | 1144297 | 1150210 | 2  | 2486017 | 2492601      | -1           | 3    |      |       |  |
| 1149051      | 1150210     | 2486017 | 2487542 | -1 | 1       | RO3G_10647.1 | RO3G_03191.1 | 578  | 314  | 93.63 |  |
| 1147362      | 1148644     | 2487753 | 2489033 | 1  | -1      | RO3G_10646.1 | RO3G_03192.1 | 493  | 409  | 80.93 |  |
| 1144297      | 1146813     | 2489909 | 2492601 | -1 | 1       | RO3G_10645.1 | RO3G_03193.1 | 1049 | 819  | 70.21 |  |
| ##Scaffold_8 | Scaffold_3  | 2053797 | 2075970 | 3  | 2311510 | 2328729      | -1           | 5    |      |       |  |
| 2074644      | 2075970     | 2311510 | 2312828 | 1  | -1      | RO3G_10978.1 | RO3G_05099.1 | 383  | 269  | 75.46 |  |
| 2072849      | 2074143     | 2313367 | 2314656 | -1 | 1       | RO3G_10977.1 | RO3G_05100.1 | 513  | 330  | 79.39 |  |
| 2066247      | 2068511     | 2315079 | 2317361 | -1 | 1       | RO3G_10974.1 | RO3G_05101.1 | 1061 | 703  | 73.83 |  |
| 2060028      | 2065387     | 2318215 | 2320106 | 1  | -1      | RO3G_10973.1 | RO3G_05103.1 | 493  | 335  | 88.06 |  |
| 2053797      | 2058252     | 2324277 | 2328729 | 1  | -1      | RO3G_10971.1 | RO3G_05106.1 | 2786 | 1461 | 93.5  |  |
| ##Scaffold_8 | Scaffold_3  | 1973128 | 1997672 | 3  | 2452849 | 2490644      | -1           | 5    |      |       |  |
| 1997333      | 1997672     | 2452849 | 2453207 | -1 | 1       | RO3G_10949.1 | RO3G_05152.1 | 150  | 75   | 98.67 |  |
| 1987581      | 1988653     | 2462479 | 2463537 | 1  | -1      | RO3G_10943.1 | RO3G_05156.1 | 476  | 245  | 95.1  |  |
| 1986310      | 1987236     | 2474494 | 2475747 | 1  | -1      | RO3G_10942.1 | RO3G_05159.1 | 327  | 317  | 59.94 |  |
| 1979675      | 1980622     | 2487332 | 2488189 | 1  | -1      | RO3G_10940.1 | RO3G_05165.1 | 139  | 143  | 60.84 |  |
| 1973128      | 1975011     | 2488491 | 2490644 | 1  | -1      | RO3G_10937.1 | RO3G_05166.1 | 955  | 594  | 75.08 |  |

|              |             |         |         |    |         |              |              |      |      |       |  |  |
|--------------|-------------|---------|---------|----|---------|--------------|--------------|------|------|-------|--|--|
| ##Scaffold_8 | Scaffold_3  | 2115450 | 2136388 | 3  | 2280030 | 2301426      | -1           | 7    |      |       |  |  |
| 2135288      | 2136388     | 2280030 | 2281131 | 1  | -1      | RO3G_11004.1 | RO3G_05085.1 | 601  | 310  | 96.77 |  |  |
| 2132669      | 2133769     | 2281486 | 2282583 | 1  | -1      | RO3G_11003.1 | RO3G_05086.1 | 566  | 330  | 91.52 |  |  |
| 2127129      | 2128647     | 2283244 | 2284621 | -1 | 1       | RO3G_11000.1 | RO3G_05087.1 | 566  | 345  | 81.74 |  |  |
| 2124201      | 2124653     | 2287057 | 2287896 | 1  | -1      | RO3G_10998.1 | RO3G_05088.1 | 265  | 150  | 98    |  |  |
| 2122676      | 2123600     | 2288139 | 2289094 | -1 | 1       | RO3G_10997.1 | RO3G_05089.1 | 445  | 220  | 97.27 |  |  |
| 2118018      | 2118708     | 2297561 | 2298135 | -1 | 1       | RO3G_10994.1 | RO3G_05092.1 | 172  | 126  | 61.9  |  |  |
| 2115450      | 2116329     | 2300445 | 2301426 | -1 | 1       | RO3G_10992.1 | RO3G_05094.1 | 249  | 287  | 61.32 |  |  |
| ##Scaffold_8 | Scaffold_3  | 2206482 | 2225014 | 3  | 1943152 | 1958910      | 1            | 4    |      |       |  |  |
| 2206482      | 2207186     | 1943152 | 1943856 | -1 | -1      | RO3G_11031.1 | RO3G_04941.1 | 328  | 234  | 82.91 |  |  |
| 2213607      | 2215084     | 1951832 | 1953437 | -1 | -1      | RO3G_11034.1 | RO3G_04947.1 | 521  | 495  | 61.01 |  |  |
| 2223782      | 2224338     | 1957186 | 1957739 | -1 | -1      | RO3G_11037.1 | RO3G_04949.1 | 301  | 148  | 97.3  |  |  |
| 2224654      | 2225014     | 1957907 | 1958910 | 1  | 1       | RO3G_11038.1 | RO3G_04950.1 | 152  | 68   | 97.06 |  |  |
| ##Scaffold_8 | Scaffold_3  | 2268351 | 2279958 | 3  | 2407668 | 2424933      | -1           | 3    |      |       |  |  |
| 2279269      | 2279958     | 2407668 | 2408866 | -1 | 1       | RO3G_11061.1 | RO3G_05137.1 | 192  | 145  | 73.79 |  |  |
| 2274238      | 2274798     | 2413581 | 2414111 | -1 | -1      | RO3G_11057.1 | RO3G_05140.1 | 231  | 142  | 88.73 |  |  |
| 2268351      | 2271815     | 2416043 | 2424933 | -1 | 1       | RO3G_11055.1 | RO3G_05142.1 | 772  | 516  | 78.49 |  |  |
| ##Scaffold_9 | Scaffold_1  | 725339  | 826321  | 1  | 3888803 | 3897497      | -1           | 3    |      |       |  |  |
| 825673       | 826321      | 3888803 | 3889450 | 1  | -1      | RO3G_11396.1 | RO3G_01495.1 | 323  | 171  | 97.66 |  |  |
| 732951       | 733759      | 3892367 | 3893677 | -1 | 1       | RO3G_11359.1 | RO3G_01499.1 | 190  | 215  | 56.28 |  |  |
| 725339       | 726915      | 3896219 | 3897497 | -1 | 1       | RO3G_11355.1 | RO3G_01501.1 | 715  | 373  | 97.32 |  |  |
| ##Scaffold_9 | Scaffold_12 | 334531  | 341466  | 12 | 917035  | 926325       | -1           | 3    |      |       |  |  |
| 339394       | 341466      | 917035  | 919225  | -1 | 1       | RO3G_11231.1 | RO3G_13634.1 | 753  | 594  | 64.31 |  |  |
| 335729       | 337927      | 921387  | 923587  | 1  | -1      | RO3G_11230.1 | RO3G_13636.1 | 1148 | 673  | 99.85 |  |  |
| 334531       | 335178      | 925665  | 926325  | 1  | -1      | RO3G_11229.1 | RO3G_13638.1 | 232  | 120  | 100   |  |  |
| ##Scaffold_9 | Scaffold_2  | 921449  | 960644  | 2  | 1450893 | 1474522      | 1            | 5    |      |       |  |  |
| 947923       | 949409      | 1450893 | 1452411 | 1  | 1       | RO3G_11439.1 | RO3G_02786.1 | 704  | 472  | 73.52 |  |  |
| 950998       | 952018      | 1456930 | 1458009 | 1  | 1       | RO3G_11441.1 | RO3G_02789.1 | 269  | 206  | 69.9  |  |  |
| 953644       | 954771      | 1467356 | 1468496 | -1 | -1      | RO3G_11443.1 | RO3G_02794.1 | 590  | 340  | 84.12 |  |  |
| 959092       | 960644      | 1469358 | 1471461 | -1 | -1      | RO3G_11445.1 | RO3G_02795.1 | 723  | 398  | 94.22 |  |  |
| 921449       | 923225      | 1473186 | 1474522 | -1 | -1      | RO3G_11430.1 | RO3G_02797.1 | 278  | 378  | 42.59 |  |  |
| ##Scaffold_9 | Scaffold_2  | 1068482 | 1105756 | 2  | 1312519 | 1349373      | 1            | 7    |      |       |  |  |
| 1068482      | 1070398     | 1312519 | 1314406 | 1  | 1       | RO3G_11488.1 | RO3G_02730.1 | 796  | 497  | 78.07 |  |  |
| 1070869      | 1074757     | 1314824 | 1318560 | -1 | -1      | RO3G_11489.1 | RO3G_02731.1 | 1204 | 1057 | 68.78 |  |  |
| 1079139      | 1080890     | 1320574 | 1322356 | 1  | 1       | RO3G_11492.1 | RO3G_02733.1 | 401  | 513  | 43.27 |  |  |
| 1089509      | 1090698     | 1323684 | 1326296 | 1  | 1       | RO3G_11494.1 | RO3G_02735.1 | 566  | 298  | 99.66 |  |  |
| 1092360      | 1094721     | 1327681 | 1330056 | -1 | -1      | RO3G_11496.1 | RO3G_02737.1 | 1203 | 771  | 83.53 |  |  |
| 1096771      | 1097133     | 1339712 | 1340081 | 1  | 1       | RO3G_11497.1 | RO3G_02740.1 | 200  | 99   | 96.97 |  |  |
| 1105154      | 1105756     | 1348339 | 1349373 | -1 | -1      | RO3G_11500.1 | RO3G_02743.1 | 234  | 194  | 55.67 |  |  |
| ##Scaffold_9 | Scaffold_2  | 1343750 | 1352465 | 2  | 1796110 | 1805114      | 1            | 3    |      |       |  |  |
| 1343750      | 1344831     | 1796110 | 1797180 | 1  | 1       | RO3G_11596.1 | RO3G_02914.1 | 562  | 322  | 86.96 |  |  |
| 1345680      | 1348345     | 1798502 | 1801178 | -1 | -1      | RO3G_11597.1 | RO3G_02915.1 | 1009 | 748  | 73.53 |  |  |
| 1350959      | 1352465     | 1803770 | 1805114 | -1 | -1      | RO3G_11598.1 | RO3G_02916.1 | 97.1 | 102  | 48.04 |  |  |
| ##Scaffold_9 | Scaffold_2  | 1492234 | 1504471 | 2  | 1503940 | 1515521      | 1            | 4    |      |       |  |  |
| 1492234      | 1493229     | 1503940 | 1505499 | -1 | -1      | RO3G_11650.1 | RO3G_02809.1 | 345  | 174  | 97.7  |  |  |
| 1493379      | 1497629     | 1505807 | 1510416 | -1 | -1      | RO3G_11651.1 | RO3G_02810.1 | 1299 | 1168 | 65.41 |  |  |
| 1498598      | 1500973     | 1511284 | 1513230 | -1 | -1      | RO3G_11652.1 | RO3G_02811.1 | 817  | 658  | 73.56 |  |  |
| 1503407      | 1504471     | 1514433 | 1515521 | 1  | 1       | RO3G_11653.1 | RO3G_02812.1 | 446  | 292  | 73.97 |  |  |
| ##Scaffold_9 | Scaffold_2  | 1553436 | 1580121 | 2  | 1044713 | 1072209      | 1            | 3    |      |       |  |  |
| 1553436      | 1555542     | 1044713 | 1046360 | -1 | -1      | RO3G_11676.1 | RO3G_02628.1 | 489  | 433  | 59.12 |  |  |
| 1561774      | 1564047     | 1052387 | 1053606 | -1 | -1      | RO3G_11678.1 | RO3G_02631.1 | 346  | 262  | 65.65 |  |  |
| 1578675      | 1580121     | 1070753 | 1072209 | -1 | -1      | RO3G_11684.1 | RO3G_02639.1 | 630  | 378  | 81.22 |  |  |
| ##Scaffold_9 | Scaffold_2  | 1629355 | 1650133 | 2  | 1091132 | 1104633      | 1            | 3    |      |       |  |  |
| 1629355      | 1633760     | 1091132 | 1094874 | 1  | 1       | RO3G_11701.1 | RO3G_02645.1 | 845  | 637  | 69.86 |  |  |
| 1642598      | 1643959     | 1100227 | 1101585 | 1  | 1       | RO3G_11703.1 | RO3G_02649.1 | 780  | 412  | 96.84 |  |  |
| 1647678      | 1650133     | 1102144 | 1104633 | 1  | 1       | RO3G_11706.1 | RO3G_02650.1 | 928  | 668  | 68.41 |  |  |
| ##Scaffold_9 | Scaffold_2  | 1691613 | 1713832 | 2  | 1733597 | 1767308      | 1            | 5    |      |       |  |  |
| 1691613      | 1694302     | 1733597 | 1737215 | -1 | -1      | RO3G_11725.1 | RO3G_02895.1 | 1144 | 823  | 74    |  |  |
| 1697511      | 1699271     | 1747510 | 1749054 | -1 | -1      | RO3G_11728.1 | RO3G_02898.1 | 520  | 360  | 76.39 |  |  |
| 1701007      | 1701804     | 1754198 | 1755912 | -1 | -1      | RO3G_11729.1 | RO3G_02899.1 | 283  | 248  | 63.71 |  |  |
| 1705933      | 1707249     | 1759268 | 1760651 | -1 | -1      | RO3G_11731.1 | RO3G_02901.1 | 342  | 275  | 58.91 |  |  |
| 1710465      | 1713832     | 1765914 | 1767308 | 1  | 1       | RO3G_11732.1 | RO3G_02903.1 | 633  | 496  | 70.56 |  |  |
| ##Scaffold_9 | Scaffold_3  | 126263  | 147370  | 3  | 625467  | 641702       | -1           | 4    |      |       |  |  |
| 145804       | 147370      | 625467  | 627019  | -1 | 1       | RO3G_11162.1 | RO3G_04451.1 | 832  | 429  | 99.53 |  |  |
| 135927       | 138289      | 629178  | 631452  | 1  | -1      | RO3G_11158.1 | RO3G_04453.1 | 820  | 644  | 64.29 |  |  |

|              |            |         |         |    |         |              |              |      |      |       |
|--------------|------------|---------|---------|----|---------|--------------|--------------|------|------|-------|
| 128981       | 129689     | 638340  | 639056  | 1  | -1      | RO3G_11156.1 | RO3G_04456.1 | 360  | 180  | 98.89 |
| 126263       | 127162     | 640566  | 641702  | -1 | 1       | RO3G_11155.1 | RO3G_04458.1 | 319  | 302  | 60.93 |
| ##Scaffold_9 | Scaffold_6 | 1759289 | 1767481 | 6  | 1766419 | 1777959      | -1           | 3    |      |       |
| 1764690      | 1767481    | 1766419 | 1769488 | -1 | 1       | RO3G_11749.1 | RO3G_08702.1 | 722  | 740  | 55.27 |
| 1763038      | 1764265    | 1769935 | 1771191 | -1 | 1       | RO3G_11748.1 | RO3G_08703.1 | 527  | 337  | 88.13 |
| 1759289      | 1761269    | 1775944 | 1777959 | -1 | 1       | RO3G_11747.1 | RO3G_08705.1 | 919  | 619  | 89.82 |
| ##Scaffold_9 | Scaffold_6 | 1882142 | 1915557 | 6  | 1314169 | 1355311      | 1            | 9    |      |       |
| 1882142      | 1883447    | 1314169 | 1315047 | -1 | -1      | RO3G_11792.1 | RO3G_08506.1 | 268  | 190  | 67.37 |
| 1883982      | 1884886    | 1318701 | 1319636 | 1  | 1       | RO3G_11793.1 | RO3G_08508.1 | 126  | 171  | 46.2  |
| 1889291      | 1889969    | 1320005 | 1321434 | -1 | -1      | RO3G_11795.1 | RO3G_08509.1 | 193  | 139  | 74.1  |
| 1900102      | 1901037    | 1325177 | 1326111 | 1  | 1       | RO3G_11799.1 | RO3G_08513.1 | 442  | 274  | 100   |
| 1903469      | 1904016    | 1327643 | 1328242 | 1  | 1       | RO3G_11801.1 | RO3G_08515.1 | 182  | 103  | 88.35 |
| 1904969      | 1905874    | 1332049 | 1333081 | 1  | 1       | RO3G_11802.1 | RO3G_08517.1 | 522  | 260  | 98.85 |
| 1909499      | 1911669    | 1349167 | 1351583 | -1 | -1      | RO3G_11804.1 | RO3G_08525.1 | 579  | 388  | 78.87 |
| 1914809      | 1914068    | 1352064 | 1353258 | -1 | -1      | RO3G_11805.1 | RO3G_08526.1 | 688  | 358  | 92.18 |
| 1914650      | 1915557    | 1354061 | 1355311 | -1 | -1      | RO3G_11806.1 | RO3G_08527.1 | 259  | 157  | 80.89 |
| ##Scaffold_9 | Scaffold_6 | 1957828 | 1969116 | 6  | 1447309 | 1470351      | 1            | 3    |      |       |
| 1957828      | 1959492    | 1447309 | 1448271 | -1 | -1      | RO3G_11822.1 | RO3G_08565.1 | 387  | 367  | 59.95 |
| 1960504      | 1961491    | 1449895 | 1450815 | -1 | -1      | RO3G_11823.1 | RO3G_08566.1 | 229  | 283  | 58.66 |
| 1967429      | 1969116    | 1468461 | 1470351 | 1  | 1       | RO3G_11826.1 | RO3G_08575.1 | 595  | 450  | 67.78 |
| ##Scaffold_9 | Scaffold_6 | 1992704 | 2005977 | 6  | 1393678 | 1426579      | -1           | 6    |      |       |
| 2005182      | 2005977    | 1393678 | 1394387 | 1  | -1      | RO3G_11841.1 | RO3G_08541.1 | 185  | 137  | 61.31 |
| 2003060      | 2004089    | 1395891 | 1396934 | -1 | 1       | RO3G_11840.1 | RO3G_08543.1 | 425  | 269  | 89.96 |
| 2000727      | 2002522    | 1401921 | 1402850 | -1 | 1       | RO3G_11839.1 | RO3G_08547.1 | 100  | 131  | 42.75 |
| 1999153      | 1999588    | 1411759 | 1412190 | -1 | 1       | RO3G_11838.1 | RO3G_08551.1 | 134  | 83   | 84.34 |
| 1995584      | 1996512    | 1420628 | 1421557 | -1 | 1       | RO3G_11836.1 | RO3G_08555.1 | 341  | 234  | 82.48 |
| 1992704      | 1994438    | 1424892 | 1426579 | -1 | 1       | RO3G_11835.1 | RO3G_08556.1 | 734  | 394  | 97.46 |
| ##Scaffold_9 | Scaffold_6 | 2196634 | 2211154 | 6  | 247663  | 272049       | 1            | 4    |      |       |
| 2196634      | 2197692    | 247663  | 248670  | -1 | -1      | RO3G_11915.1 | RO3G_08083.1 | 392  | 346  | 73.7  |
| 2202388      | 2202852    | 257653  | 258457  | -1 | -1      | RO3G_11918.1 | RO3G_08086.1 | 115  | 109  | 48.62 |
| 2207027      | 2209342    | 265599  | 267128  | 1  | 1       | RO3G_11920.1 | RO3G_08089.1 | 535  | 348  | 72.99 |
| 2209539      | 2211154    | 270284  | 272049  | -1 | -1      | RO3G_11921.1 | RO3G_08092.1 | 630  | 418  | 78.95 |
| ##Scaffold_9 | Scaffold_6 | 2066038 | 2075695 | 6  | 1485431 | 1496527      | -1           | 3    |      |       |
| 2071898      | 2075695    | 1485431 | 1489226 | -1 | 1       | RO3G_11872.1 | RO3G_08583.1 | 1624 | 1235 | 65.18 |
| 2066991      | 2069446    | 1492129 | 1494594 | 1  | -1      | RO3G_11870.1 | RO3G_08585.1 | 1286 | 787  | 85.39 |
| 2066038      | 2066641    | 1495375 | 1496527 | 1  | -1      | RO3G_11869.1 | RO3G_08586.1 | 332  | 182  | 81.32 |

\* the lines start with ## define each syntenic block, display the corresponding scaffolds in the genome, coordinates where each syntenic regions start and stop, orientation and number of genes that define each region. The lines within each block are detailed information of each gene pair including start/stop of first gene, start/stop of second genes orientation of first genes orientation of second genes, first genes, second gene, annotated gene length of first gene, annotation length of second gene and sequence identity of the pair.
