# Supplementary material for: Genomic Analysis of the Basal Lineage Fungus Rhizopus oryzae Reveals a Whole-Genome Duplication
Source: PubMed Central journal article supplement (PMC2699053; doi:10.1371/journal.pgen.1000549), 2009-07-03
Supplement: pgen.1000549.s014.pdf [file pgen.1000549.s014.pdf]

**Table S7 Best-blast hits between *P. blakesleeanus* and *R. oryzae***

|                                             | <i>P. blakesleeanus</i> blast<br>against <i>R. oryzae</i> | <i>R. oryzae</i> blast against <i>P.</i><br><i>blakesleeanus</i> | <i>R. oryzae</i> duplicates blast<br>against <i>P. blakesleeanus</i> |
|---------------------------------------------|-----------------------------------------------------------|------------------------------------------------------------------|----------------------------------------------------------------------|
| Total genes with<br>blast hits <sup>a</sup> | 6687                                                      | 8048                                                             | 1015                                                                 |
| 1-to-1 hits <sup>b</sup>                    | 3579                                                      | 3533                                                             | 129                                                                  |
| 2-to-1 hits <sup>c</sup>                    | 1692                                                      | 2726                                                             | 852                                                                  |

<sup>a</sup>The best hits are based on single linkage blast from query to the reference protein set (1e-20, 60% length cutoff);

<sup>b</sup>1-to-1 hits: only one homologous in the other genome;

<sup>c</sup>2 genes hit the same gene in the other as the best blast hit.
