# Supplementary material for: Genomic Analysis of the Basal Lineage Fungus Rhizopus oryzae Reveals a Whole-Genome Duplication
Source: PubMed Central journal article supplement (PMC2699053; doi:10.1371/journal.pgen.1000549), 2009-07-03
Supplement: pgen.1000549.s015.pdf [file pgen.1000549.s015.pdf]

**Table S8 GO term enrichment among the retained genes (Fisher's exact tests)**

| <b>GO terms</b> | <b>Description</b>                                         | <b>FDR</b> | <b>p-value</b> | <b>Duplic<br/>ates</b> | <b>Total<br/>genes</b> | <b>#nonAnnot<br/>duplicates</b> | <b>#nonAnnot<br/>all genes</b> |
|-----------------|------------------------------------------------------------|------------|----------------|------------------------|------------------------|---------------------------------|--------------------------------|
| GO:0043234      | protein complex                                            | 0.004912   | 4.30E-05       | 160                    | 691                    | 422                             | 2759                           |
| GO:0043232      | intracellular non-membrane-bound organelle                 | 0.008036   | 1.66E-04       | 107                    | 435                    | 475                             | 3015                           |
| GO:0006091      | generation of precursor metabolites and energy             | 0.004912   | 5.15E-05       | 54                     | 170                    | 528                             | 3280                           |
| GO:0009057      | macromolecule catabolic process                            | 0.004433   | 6.93E-06       | 43                     | 111                    | 539                             | 3339                           |
| GO:0044265      | cellular macromolecule catabolic process                   | 0.004550   | 1.66E-05       | 39                     | 100                    | 543                             | 3350                           |
| GO:0030163      | protein catabolic process                                  | 0.004550   | 2.86E-05       | 26                     | 54                     | 556                             | 3396                           |
| GO:0006511      | ubiquitin-dependent protein catabolic process              | 0.004912   | 5.90E-05       | 22                     | 43                     | 560                             | 3407                           |
| GO:0051603      | proteolysis involved in cellular protein catabolic process | 0.005906   | 7.68E-05       | 22                     | 44                     | 560                             | 3406                           |
| GO:0046365      | monosaccharide catabolic process                           | 0.008036   | 1.27E-04       | 15                     | 23                     | 567                             | 3427                           |
| GO:0016717      | oxidoreductase activity                                    | 0.004912   | 5.43E-05       | 6                      | 1                      | 576                             | 3449                           |
| GO:0009260      | ribonucleotide biosynthetic process                        | 0.008036   | 1.38E-04       | 19                     | 36                     | 563                             | 3414                           |
| GO:0006006      | glucose metabolic process                                  | 0.004550   | 2.11E-05       | 20                     | 33                     | 562                             | 3417                           |
| GO:0031012      | extracellular matrix                                       | 0.013976   | 9.79E-04       | 7                      | 6                      | 575                             | 3444                           |
