# Supplementary material for: Genomic Analysis of the Basal Lineage Fungus Rhizopus oryzae Reveals a Whole-Genome Duplication
Source: PubMed Central journal article supplement (PMC2699053; doi:10.1371/journal.pgen.1000549), 2009-07-03
Supplement: pgen.1000549.s017.pdf [file pgen.1000549.s017.pdf]

**Table S10 Duplication of V-ATPase\***

| Subunits       | SC_gene_id | Subunit  | SC_Gene Symbol | Rhizopus Homolog | Protein similarity (%) | E-Value   | Blast score |
|----------------|------------|----------|----------------|------------------|------------------------|-----------|-------------|
| V <sub>1</sub> | YDL185W    | SubunitA | TFP1           | RO3G_03665.1     | 75.49                  | 2.00E-111 | 842         |
|                |            |          |                | RO3G_01898.1     | 61.8                   | 3.00E-124 | 884         |
|                | YBR127C    | SubunitB | VMA2           | RO3G_09588.1     | 84.23                  | 0         | 819         |
|                |            |          |                | RO3G_12684.1     | 88.59                  | 0         | 673         |
|                | YKL080W    | SubunitC | VMA5           | RO3G_04912.1     | 40.47                  | 6.00E-69  | 256         |
|                |            |          |                | RO3G_16944.1     | 37.33                  | 1.00E-66  | 249         |
|                | YEL051W    | SubunitD | VMA8           | RO3G_08247.1     | 63.95                  | 3.00E-81  | 296         |
|                |            |          |                | RO3G_16433.1     | 64.34                  | 9.00E-81  | 295         |
|                | YOR332W    | SubunitE | VMA4           | RO3G_17130.1     | 35.38                  | 8.00E-35  | 142         |
|                |            |          |                | RO3G_15731.1     | 38.98                  | 3.00E-29  | 123         |
|                | YGR020C    | SubunitF | VMA7           | RO3G_03185.1     | 60.17                  | 3.00E-33  | 135         |
|                | YPR036W    | SubunitH | VMA13          | RO3G_02983.1     | 31.08                  | 1.00E-28  | 123         |
| YHR039C-A      | SubunitG   | VMA10    | RO3G_05370.1   | 36.28            | 3E-12                  | 65.5      |             |
| V <sub>0</sub> | YEL027W    | c        | VMA3           | RO3G_06137.1     | 72.9                   | 5.00E-44  | 171         |
|                |            |          |                | RO3G_00069.1     | 72.34                  | 2.00E-36  | 146         |
|                | YPL234C    | c'       | VMA11          | RO3G_15091.1     | 69.03                  | 3.00E-50  | 192         |
|                |            |          |                | RO3G_08000.1     | 69.28                  | 1.00E-49  | 190         |
|                | YHR026W    | C''      | VMA16          | RO3G_10009.1     | 61.58                  | 3.00E-43  | 169         |
|                |            |          |                | RO3G_06330.1     | 46                     | 2.00E-26  | 114         |
|                | YMR054W    | a        | STV1           | RO3G_04819.1     | 41.41                  | 2.00E-172 | 602         |
|                | YLR447C    | d        | VMA6           | RO3G_07464.1     | 51.20                  | 5E-94     | 343         |

\* The homologous genes were detected using BLASTP (1e-5). Proteins from SGD are used to search for the homologous sequence in *R. oryzae* protein set.
