# Supplementary material for: Genomic Analysis of the Basal Lineage Fungus Rhizopus oryzae Reveals a Whole-Genome Duplication
Source: PubMed Central journal article supplement (PMC2699053; doi:10.1371/journal.pgen.1000549), 2009-07-03
Supplement: pgen.1000549.s018.pdf [file pgen.1000549.s018.pdf]

**Table S11 Duplication of ubiquitin-proteasome system \***

| <b>Domain</b>       | <b>SC_gene_id</b>  | <b>Subunit</b> | <b>SC_Gene Symbol</b> | <b>Rhizopus Homolog</b> | <b>Protein similarity (%)</b> | <b>E-Value</b> | <b>Blast score</b> |
|---------------------|--------------------|----------------|-----------------------|-------------------------|-------------------------------|----------------|--------------------|
| ALPHA<br>GO:0019773 | YMR314W            | alpha1         | PRE5                  | RO3G_07009.1            | 51.06                         | 1.00E-61       | 231                |
|                     |                    |                |                       | RO3G_05229.1            | 46.39                         | 7.00E-39       | 155                |
|                     | YML092C            | alpha2         | PRE8                  | RO3G_00510.1            | 63.16                         | 4.00E-83       | 302                |
|                     | YOR362C            | alpha3         | PRE10                 | RO3G_02194.1            | 56.10                         | 5.00E-71       | 263                |
|                     |                    |                |                       | RO3G_17174.1            | 58.50                         | 6.00E-60       | 226                |
|                     | YGR135W            | alpha4         | PRE9                  | RO3G_16334.1            | 62.81                         | 9.00E-86       | 311                |
|                     |                    |                |                       | RO3G_01442.1            | 62.40                         | 6.00E-85       | 308                |
|                     | YGR253C            | alpha5         | PUP2                  | RO3G_13946.1            | 72.29                         | 4.00E-92       | 332                |
|                     |                    |                |                       | RO3G_02363.1            | 71.43                         | 1.00E-91       | 330                |
|                     | YGL011C            | alpha6         | SCL1                  | RO3G_08543.1            | 53.5                          | 3.00E-66       | 246                |
|                     |                    |                |                       | RO3G_11840.1            | 49.25                         | 4.00E-63       | 236                |
|                     | YOL038W            | alpha7         | PRE6                  | RO3G_10410.1            | 63.98                         | 7.00E-85       | 308                |
|                     |                    |                |                       | RO3G_12882.1            | 63.14                         | 1.00E-83       | 304                |
|                     | BETA<br>GO:0019774 | YBL041W        | beta1                 | PRE7                    | RO3G_02562.1                  | 48.71          | 2.00E-60           |
| RO3G_12422.1        |                    |                |                       |                         | 48.71                         | 3.00E-60       | 226                |
| YER012W             |                    | beta2          | PRE1                  | RO3G_02025.1            | 46.63                         | 3.00E-51       | 196                |
|                     |                    |                |                       | RO3G_00621.1            | 50.00                         | 7.00E-48       | 185                |
| YER094C             |                    | beta3          | PUP3                  | RO3G_16220.1            | 67.84                         | 5.00E-72       | 265                |
|                     |                    |                |                       | RO3G_00525.1            | 60.00                         | 5.00E-54       | 205                |
| YFR050C             |                    | beta4          | PRE4                  | RO3G_17028.1            | 46.72                         | 3.00E-64       | 239                |
|                     |                    |                |                       | RO3G_05772.1            | 46.72                         | 1.00E-63       | 238                |
| YPR103W             |                    | beta5          | PRE2                  | RO3G_02563.1            | 72.73                         | 8.00E-99       | 355                |
|                     |                    |                |                       | RO3G_12421.1            | 75.69                         | 2.00E-78       | 287                |
| YJL001W             |                    | beta6          | PRE3                  | RO3G_17089.1            | 69.39                         | 7.00E-78       | 285                |
|                     |                    |                |                       | RO3G_05850.1            | 69.90                         | 7.00E-78       | 285                |
| YOR157C             |                    | beta7          | PUP1                  | RO3G_00008.1            | 61.26                         | 8.00E-85       | 308                |
| YKL145W             |                    | ATPase         | RPT1                  | RO3G_11342.1            | 74.73                         | 0              | 649                |
|                     | RO3G_01562.1       |                |                       | 74.09                   | 0                             | 644            |                    |
| YDL007W             | ATPase             | RPT2           | RO3G_10320.1          | 77.57                   | 8.00E-168                     | 585            |                    |
|                     |                    |                | RO3G_09510.1          | 77.57                   | 8.00E-168                     | 585            |                    |
| YDR394W             | ATPase             | RPT3           | RO3G_02649.1          | 78.51                   | 8.00E-152                     | 531            |                    |
|                     |                    |                | RO3G_11703.1          | 78.24                   | 1.00E-151                     | 531            |                    |

|                        |         |        |              |              |           |           |       |
|------------------------|---------|--------|--------------|--------------|-----------|-----------|-------|
| ATPase<br>GO:0008540   | YOR259C | ATPase | RPT4         | RO3G_05070.1 | 72.05     | 1.00E-166 | 581   |
|                        |         |        |              | RO3G_17184.1 | 72.05     | 4.00E-166 | 579   |
|                        | YOR117W | ATPase | RPT5         | RO3G_03248.1 | 73.48     | 2.00E-156 | 547   |
|                        | YGL048C | ATPase | RPT6         | RO3G_12232.1 | 78.72     | 4.00E-179 | 622   |
|                        |         |        | RO3G_13191.1 | 74.87        | 2.00E-166 | 580       |       |
|                        | YHR027C | lid    | RPN1         | RO3G_04180.1 | 46.59     | 4.00E-141 | 497   |
|                        |         |        |              | RO3G_05728.1 | 47.02     | 8.00E-141 | 496   |
|                        | YIL075C | lid    | RPN2         | RO3G_03530.1 | 44.97     | 0.00      | 739   |
|                        |         |        |              | RO3G_13173.1 | 44.60     | 0.00      | 729   |
|                        | YER021W | lid    | RPN3         | RO3G_08878.1 | 35.14     | 3.00E-81  | 297   |
|                        |         |        |              | RO3G_13792.1 | 44.69     | 1.00E-60  | 229   |
|                        | YDL147W | lid    | RPN5         | RO3G_11498.1 | 41.34     | 3.00E-89  | 324   |
|                        | YDL097C | lid    | RPN6         | RO3G_03191.1 | 52.76     | 2.00E-98  | 354   |
|                        |         |        |              | RO3G_10647.1 | 48.57     | 6.00E-62  | 233   |
| LID<br>GO:0008541      | YPR108W | lid    | RPN7         | RO3G_03190.1 | 42.15     | 2.00E-80  | 294   |
|                        |         |        |              | RO3G_10648.1 | 38.22     | 2.00E-65  | 245   |
|                        | YOR261C | lid    | RPN8         | RO3G_05875.1 | 57.19     | 6.00E-85  | 309   |
|                        |         |        |              | RO3G_04162.1 | 55.67     | 9.00E-79  | 288   |
|                        | YDR427W | lid    | RPN9         | RO3G_14739.1 | 38.97     | 1.00E-62  | 235   |
|                        |         |        |              | RO3G_09387.1 | 36.5      | 1.00E-60  | 229   |
|                        | YHR200W | lid    | RPN10        | RO3G_03333.1 | 52.54     | 8.00E-61  | 228   |
|                        | YFR004W | lid    | RPN11        | RO3G_06585.1 | 66.24     | 2.00E-108 | 387   |
|                        |         |        |              | RO3G_07479.1 | 68.66     | 2.00E-99  | 357   |
|                        | YFR052W | lid    | RPN12        | RO3G_11697.1 | 35.27     | 4.00E-21  | 97.1  |
|                        | YLR421C | lid    | RPN13        | RO3G_15490.1 | 41.59     | 9.47E-05  | 35.01 |
|                        |         |        |              | RO3G_03740.1 | 37.00     | 0.00233   | 32.23 |
|                        | YGR048W | E1     | UFD1         | RO3G_14097.1 | 41.56     | 1.00E-57  | 218   |
| Ubi-<br>Modi-<br>fiers |         |        |              | RO3G_02537.1 | 40.77     | 7.00E-40  | 159   |
|                        | YBR170C | E2     | NPL4         | RO3G_06628.1 | 40.48     | 5.00E-113 | 403   |
|                        | YDL126C | E3     | CDC48        | RO3G_12602.1 | 75.48     | 0         | 1089  |
|                        |         |        |              | RO3G_07895.1 | 74.94     | 0         | 1088  |

\* The homologous genes were detected using BLASTP (1e-5); the homologous sequence for a short protein YLR421C (156 aa) was identified through manual inspection.
