# Supplementary material for: Genomic Analysis of the Basal Lineage Fungus Rhizopus oryzae Reveals a Whole-Genome Duplication
Source: PubMed Central journal article supplement (PMC2699053; doi:10.1371/journal.pgen.1000549), 2009-07-03
Supplement: pgen.1000549.s021.pdf [file pgen.1000549.s021.pdf]

**Table S14. Comparison of regulators of Ras superfamily GTPases in *Rhizopus oryzae* and Dikarya.**

|                                       | Name(s) of orthologs                           | No. of paralogs in <i>Rhizopus</i> | Gene ID                                                                                                                                     | Phyletic pattern of orthologs in Dikarya |     |     |     |     |     |     |     | Notes                                                                                                                                  |
|---------------------------------------|------------------------------------------------|------------------------------------|---------------------------------------------------------------------------------------------------------------------------------------------|------------------------------------------|-----|-----|-----|-----|-----|-----|-----|----------------------------------------------------------------------------------------------------------------------------------------|
|                                       |                                                |                                    |                                                                                                                                             | Ncr                                      | Afu | Yli | Scs | Spo | Uma | Cne | Cci |                                                                                                                                        |
| <b>RasGAP</b> domain proteins         | Ira1/Ira2                                      | 8                                  | RO3G_15507.1<br>RO3G_16654.1<br>RO3G_03157.1<br>RO3G_00611.1<br>RO3G_02179.1<br>RO3G_10923.1<br>RO3G_02034.1<br>RO3G_16652.1*+RO3G_16653.1* | 1                                        | 0   | 1   | 2   | 0   | 1   | 1   | 1   | NF1 in Metazoa                                                                                                                         |
|                                       | Bud2                                           | 1                                  | RO3G_00771.1*                                                                                                                               | 1                                        | 1   | 1   | 1   | 0   | 1   | 0   | 1   | Rap-specific GAP                                                                                                                       |
|                                       | Iqg1                                           | 3                                  | RO3G_05681.1<br>RO3G_10660.1<br>RO3G_05758.1                                                                                                | 1                                        | 1   | 1   | 1   | 1   | 1   | 1   | 1   | Related to IQGAP in Metazoa                                                                                                            |
|                                       | Gap1 (as in <i>S. pombe</i> )                  | 4                                  | RO3G_00167.1<br>RO3G_08138.1<br>RO3G_13371.1<br>RO3G_12218.1                                                                                | 1                                        | 1   | 0   | 0   | 1   | 1   | 1   | 1   | Related to IQGAP in Metazoa                                                                                                            |
| <b>RapGAP</b> domain proteins         | TSC2 (as in human)                             | 1                                  | RO3G_03221.1                                                                                                                                | 1                                        | 1   | 1   | 0   | 2   | 1   | 1   | 1   | tuberin (tuberous sclerosis complex 2), GAP for the Rheb GTPase                                                                        |
|                                       | GARNL1/AS250 (as in human)                     | 1                                  | RO3G_15088.1*                                                                                                                               | 0                                        | 0   | 0   | 0   | 0   | 0   | 0   | 0   | Orthologs in Metazoa, absent from all genomes of Dikarya in GenBank/EMBL/DDBJ                                                          |
|                                       | Rap1GAP/SIPA1/GARNL3/GARNL4 etc. (as in human) | 4                                  | RO3G_12030.1*<br>RO3G_08783.1*<br>RO3G_04769.1*<br>RO3G_10959.1*                                                                            | 0                                        | 0   | 0   | 0   | 0   | 0   | 0   | 0   | Orthologous to an independently diversified group of Metazoan RapGAP proteins. Absent from all genomes of Dikarya in GenBank/EMBL/DDBJ |
| <b>RasGEF</b> (Cdc25) domain proteins | Lte1                                           | 4                                  | RO3G_12749.1*<br>RO3G_10474.1*<br>RO3G_00547.1*<br>RO3G_00890.1*                                                                            | 1                                        | 1   | 1   | 1   | 0   | 1   | 0   | 1   |                                                                                                                                        |
|                                       | Bem2                                           | 2                                  | RO3G_03905.1*<br>RO3G_09710.1*+RO3G_09709.1*                                                                                                | 0                                        | 0   | 1   | 1   | 0   | 1   | 0   | 1   | Has also a RhoGAP domain, see below. <i>A. fumigatus</i> Bem2 does not have the RasGEF domain, so it is not listed here                |
|                                       | Cdc25                                          | 8                                  | RO3G_15392.1*<br>RO3G_16585.1*                                                                                                              | 1                                        | 1   | 1   | 1   | 2   | 1   | 1   | ≥4  | In the reference <i>S. cerevisiae</i> strain S288C there is a second                                                                   |



|                                    |                                      |   |                                                                                              |   |   |   |   |   |   |   |   |                                                                                                                                                                                        |
|------------------------------------|--------------------------------------|---|----------------------------------------------------------------------------------------------|---|---|---|---|---|---|---|---|----------------------------------------------------------------------------------------------------------------------------------------------------------------------------------------|
|                                    |                                      |   | RO3G_05843.1                                                                                 |   |   |   |   |   |   |   |   |                                                                                                                                                                                        |
|                                    | Bem3                                 | 2 | RO3G_01659.1<br>RO3G_06509.1*+RO3G_06510.1*                                                  | 1 | 2 | 2 | 1 | 1 | 1 | 1 | 1 |                                                                                                                                                                                        |
|                                    | Bag7/Sac7                            | 3 | RO3G_13168.1<br>RO3G_13009.1<br>RO3G_05294.1                                                 | 3 | 1 | 1 | 2 | 1 | 1 | 1 | 1 |                                                                                                                                                                                        |
|                                    | Ecm25                                | 1 | RO3G_07553.1                                                                                 | 0 | 0 | 1 | 1 | 0 | 1 | 0 | 1 |                                                                                                                                                                                        |
|                                    | KIAA1688 (as in human)               | 3 | RO3G_04185.1<br>RO3G_15953.1<br>RO3G_16336.1                                                 | 0 | 0 | 0 | 0 | 0 | 0 | 1 | 1 | Absent from all genomes of Ascomycota in GenBank/EMBL/DBJ                                                                                                                              |
|                                    | Rgd2                                 | 4 | RO3G_05223.1<br>RO3G_07014.1<br>RO3G_04920.1<br>RO3G_16939.1                                 | 1 | 1 | 2 | 2 | 2 | 1 | 1 | 1 |                                                                                                                                                                                        |
|                                    | ORCL (as in human)                   | 1 | RO3G_01102.1                                                                                 | 1 | 1 | 1 | 0 | 1 | 0 | 1 | 2 |                                                                                                                                                                                        |
|                                    | Un-named RhoGAP protein              | 4 | RO3G_13089.1<br>RO3G_10031.1<br>RO3G_10123.1<br>RO3G_13558.1                                 | 0 | 0 | 0 | 0 | 0 | 1 | 1 | 1 | Absent from all genomes of Ascomycota in GenBank/EMBL/DBJ                                                                                                                              |
|                                    | Un-named RhoGAP protein              | 3 | RO3G_08289.1<br>RO3G_04282.1<br>RO3G_02658.1                                                 | 0 | 0 | 0 | 0 | 0 | 0 | 0 | 0 | Without obvious orthologs in Dikarya or Metazoa, may be divergent paralog of Bem3                                                                                                      |
|                                    | Un-named RhoGAP protein              | 2 | RO3G_15796.1<br>RO3G_09647.1*+ RO3G_09646.1*                                                 | 0 | 0 | 0 | 0 | 0 | 0 | 0 | 0 | Without obvious orthologs in Dikarya or Metazoa, may be divergent paralog of Bem3                                                                                                      |
| <b>RhoGEF (DH) domain proteins</b> | Cdc24                                | 5 | RO3G_07086.1<br>RO3G_06839.1<br>RO3G_05390.1<br>RO3G_00602.1<br>RO3G_01873.1                 | 1 | 1 | 1 | 1 | 1 | 1 | 1 | 1 |                                                                                                                                                                                        |
|                                    | Fus2                                 | 2 | RO3G_10077.1<br>RO3G_10027.1                                                                 | 1 | 1 | 1 | 1 | 2 | 1 | 1 | 1 |                                                                                                                                                                                        |
|                                    | Intersectin (common name in Metazoa) | 1 | RO3G_00164.1                                                                                 | 0 | 0 | 0 | 0 | 0 | 1 | 1 | 1 | ITSN1 and ITSN2 in human. Pan1 from Ascomycota is homologous to the N-terminal half of Intersectin, but does not have the C-terminal RhoGEF domain                                     |
|                                    | Rom1/Tus1 group                      | 9 | RO3G_00951.1<br>RO3G_07161.1<br>RO3G_10407.1<br>RO3G_03084.1<br>RO3G_08775.1<br>RO3G_02600.1 | 2 | 2 | 2 | 3 | 3 | 2 | 3 | 4 | Two groups of similar paralogs (Rom1/Rom2 and Tus1 in <i>S. cerevisiae</i> ) both with the CNH domain conserved in Dikarya. It is unclear whether this split applies also to Rhizopus. |

|                                                                                              |                                              |                    |                                                                                                                                              |   |   |   |   |   |   |   |   |                                                               |                           |
|----------------------------------------------------------------------------------------------|----------------------------------------------|--------------------|----------------------------------------------------------------------------------------------------------------------------------------------|---|---|---|---|---|---|---|---|---------------------------------------------------------------|---------------------------|
|                                                                                              |                                              |                    | RO3G_14312.1<br>RO3G_16337.1<br>RO3G_04648.1                                                                                                 |   |   |   |   |   |   |   |   |                                                               |                           |
|                                                                                              | Bud3                                         | 3                  | RO3G_09353.1<br>RO3G_02916.1<br>missing annotation on supercontig 3.9                                                                        | 1 | 1 | 1 | 1 | 1 | 1 | 1 | 1 |                                                               |                           |
|                                                                                              | Rsp (as in <i>Neurospora crassa</i> )        | 4                  | RO3G_03682.1<br>RO3G_16277.1<br>RO3G_02064.<br>RO3G_04570.1                                                                                  | 1 | 1 | 1 | 0 | 0 | 1 | 1 | 1 |                                                               |                           |
|                                                                                              | GEF1 (as in <i>Cryptococcus neoformans</i> ) | 2                  | RO3G_00761.1<br>RO3G_07178.1                                                                                                                 | 0 | 0 | 0 | 0 | 0 | 1 | 1 | 1 | Absent from all genomes of Ascomycota in GenBank/EMBL/DBJ     |                           |
|                                                                                              | Un-named RhoGEF domain protein               | 3                  | RO3G_01901.1<br>RO3G_06573.1<br>RO3G_07625.1                                                                                                 | 0 | 0 | 0 | 0 | 0 | 0 | 0 | 0 | Orthologs difficult to define without a phylogenetic analysis |                           |
|                                                                                              | Un-named RhoGEF domain protein               | 1                  | RO3G_05847.1                                                                                                                                 | 0 | 0 | 0 | 0 | 0 | 0 | 0 | 0 | Orthologs difficult to define without a phylogenetic analysis |                           |
|                                                                                              | Un-named RhoGEF domain protein               | 7                  | RO3G_09360.1<br>RO3G_12714.1<br>RO3G_02904.1<br>RO3G_04521.1<br>RO3G_06993.1<br>RO3G_11151.1*+ RO3G_11150.1*<br>RO3G_04760.1*+ RO3G_04761.1* | 0 | 0 | 0 | 0 | 0 | 0 | 0 | 0 | Orthologs difficult to define without a phylogenetic analysis |                           |
| <b>CZH family</b><br>(GEFs for RHO GTPases)                                                  | Ylr422w                                      | 2                  | RO3G_08501.1<br>RO3G_00053.1                                                                                                                 | 1 | 1 | 1 | 1 | 0 | 1 | 1 | 1 |                                                               |                           |
| <b>RHO GDI</b>                                                                               | Rdi1                                         | 2                  | RO3G_14141.1<br>RO3G_02285.1                                                                                                                 | 1 | 1 | 2 | 1 | 1 | 1 | 1 | 1 | GDP-dissociation inhibitor of RHO GTPases                     |                           |
| <b>REP/GDI family</b>                                                                        | Gdi                                          | 2                  | RO3G_03976.1<br>RO3G_05580.1                                                                                                                 | 1 | 1 | 1 | 1 | 1 | 1 | 1 | 1 | GDP-dissociation inhibitor of RAB GTPases                     |                           |
|                                                                                              | Mrs6                                         | 1                  | RO3G_16113.1                                                                                                                                 | 1 | 1 | 1 | 1 | 1 | 1 | 1 | 1 | RAB escort protein (REP)                                      |                           |
| <b>TRAPP complex</b><br>GEF for RAB GTPases<br>Ypt1/Rab1 (TRAPP-I) and Ypt3/Rab11 (TRAPP-II) | Bet3                                         | 1                  | RO3G_16065.1*+RO3G_16066.1*                                                                                                                  | 1 | 1 | 1 | 1 | 1 | 1 | 1 | 1 | Both TRAPP-I and TRAPP-II                                     |                           |
|                                                                                              | Bet5                                         | 1                  | RO3G_11159.1                                                                                                                                 | 1 | 1 | 1 | 1 | 1 | 1 | 1 | 1 | Both TRAPP-I and TRAPP-II                                     |                           |
|                                                                                              | Trs20                                        | 1                  | Missing annotation on supercontig 3.2                                                                                                        | 1 | 1 | 1 | 1 | 1 | 1 | 1 | 1 | Both TRAPP-I and TRAPP-II                                     |                           |
|                                                                                              | Trs23                                        | 1                  | RO3G_00822.1                                                                                                                                 | 1 | 1 | 1 | 1 | 1 | 1 | 1 | 1 | Both TRAPP-I and TRAPP-II                                     |                           |
|                                                                                              | Trs31                                        | 1                  | RO3G_01760.1                                                                                                                                 | 1 | 1 | 1 | 1 | 1 | 1 | 1 | 1 | Both TRAPP-I and TRAPP-II                                     |                           |
|                                                                                              | Trs33                                        | 1 (+ 1 pseudogene) | RO3G_12899.1<br>(RO3G_10390.1)                                                                                                               | 1 | 1 | 1 | 1 | 1 | 1 | 1 | 1 | 1                                                             | Both TRAPP-I and TRAPP-II |
|                                                                                              | Gsg1                                         | 1                  | RO3G_12377.1                                                                                                                                 | 1 | 1 | 1 | 1 | 2 | 1 | 1 | 1 | 1                                                             | Both TRAPP-I and TRAPP-II |

|                                                                                                                 |                                 |   |                                                                                       |   |   |   |   |   |   |   |   |   |                                                                                                                                                                                            |
|-----------------------------------------------------------------------------------------------------------------|---------------------------------|---|---------------------------------------------------------------------------------------|---|---|---|---|---|---|---|---|---|--------------------------------------------------------------------------------------------------------------------------------------------------------------------------------------------|
|                                                                                                                 | Trs120                          | 2 | RO3G_05389.1<br>RO3G_09669.1                                                          | 1 | 1 | 1 | 1 | 1 | 1 | 1 | 1 | 1 | Only in TRAPP-II                                                                                                                                                                           |
|                                                                                                                 | Trs130                          | 1 | RO3G_08432.1                                                                          | 1 | 1 | 1 | 1 | 1 | 1 | 1 | 1 | 1 | Only in TRAPP-II                                                                                                                                                                           |
|                                                                                                                 | Kre11                           | 1 | RO3G_11258.1                                                                          | 1 | 1 | 1 | 1 | 0 | 1 | 1 | 1 | 1 | Only in TRAPP-II                                                                                                                                                                           |
| <b>VPS9 domain</b><br>proteins (RAB5<br>subfamily GEFs)                                                         | Vps9                            | 2 | RO3G_05970.1*<br>RO3G_10327.1*                                                        | 1 | 1 | 1 | 1 | 1 | 1 | 1 | 1 | 1 |                                                                                                                                                                                            |
|                                                                                                                 | Muk1                            | 1 | RO3G_16880.1*                                                                         | 1 | 1 | 1 | 1 | 1 | 1 | 1 | 1 | 1 |                                                                                                                                                                                            |
|                                                                                                                 | Yml002w                         | 2 | RO3G_06004.1*<br>RO3G_00004.1*                                                        | 1 | 1 | 1 | 1 | 0 | 0 | 0 | 0 | 0 | Absent from all genomes of<br>Basidiomycota checked                                                                                                                                        |
| <b>Sec2 -like</b><br>GEF for the Sec4<br>GTPase                                                                 | Sec2                            | 8 | RO3G_11194.1*                                                                         | 2 | 2 | 1 | 1 | 1 | 1 | 1 | 1 | 2 |                                                                                                                                                                                            |
|                                                                                                                 |                                 |   | RO3G_04377.1*                                                                         |   |   |   |   |   |   |   |   |   |                                                                                                                                                                                            |
|                                                                                                                 |                                 |   | RO3G_08373.1*                                                                         |   |   |   |   |   |   |   |   |   |                                                                                                                                                                                            |
|                                                                                                                 |                                 |   | RO3G_16280.1                                                                          |   |   |   |   |   |   |   |   |   |                                                                                                                                                                                            |
|                                                                                                                 |                                 |   | RO3G_03691.1*                                                                         |   |   |   |   |   |   |   |   |   |                                                                                                                                                                                            |
|                                                                                                                 |                                 |   | RO3G_12699.1*                                                                         |   |   |   |   |   |   |   |   |   |                                                                                                                                                                                            |
|                                                                                                                 |                                 |   | RO3G_12892.1*                                                                         |   |   |   |   |   |   |   |   |   |                                                                                                                                                                                            |
| RO3G_10400.1*                                                                                                   |                                 |   |                                                                                       |   |   |   |   |   |   |   |   |   |                                                                                                                                                                                            |
| <b>Ric1-Rgp1</b><br><b>complex</b><br>GEF for the Ypt6<br>GTPase                                                | Ric1                            | 1 | RO3G_14200.1*                                                                         | 1 | 1 | 1 | 1 | 1 | 1 | 1 | 1 | 1 |                                                                                                                                                                                            |
|                                                                                                                 | Rgp1                            | 1 | RO3G_06973.1*+ RO3G_06972.1*                                                          | 1 | 1 | 1 | 1 | 1 | 1 | 1 | 1 | 1 |                                                                                                                                                                                            |
| <b>Vam6</b><br>GEF for the Ypt7<br>GTPase                                                                       | Vam6                            | 1 | RO3G_02435.1                                                                          | 1 | 1 | 1 | 1 | 1 | 1 | 1 | 1 | 1 | Subunit of the HOPS tethering<br>complex                                                                                                                                                   |
| <b>RCC1 domain</b><br>proteins<br>(included only<br>those directly<br>talking to Ras<br>superfamily<br>GTPases) | Smr1                            | 4 | RO3G_05651.1<br>RO3G_17067.1<br>RO3G_16655.1<br>Missing annotation on supercontig 3.6 | 2 | 1 | 1 | 1 | 1 | 1 | 1 | 1 | 1 | RCC1 in Metazoa, GEF for the<br>RAN GTPase                                                                                                                                                 |
|                                                                                                                 | Un-named RCC1<br>domain protein | 1 | RO3G_15049.1                                                                          | 0 | 0 | 0 | 0 | 0 | 0 | 0 | 0 | 0 | RCC1 domain protein most<br>similar to Glo-4 from <i>C. elegans</i> ,<br>GEF for the RAB GTPase Glo-1<br>(=Rab32). Orthologs absent from<br>all genomes of Dikarya in<br>GenBank/EMBL/DDBJ |
|                                                                                                                 | RCC2 (as in human)              | 0 | -                                                                                     | 0 | 0 | 0 | 0 | 0 | 1 | 1 | 1 | 1 | Present also in Metazoa and<br><i>Phycomyces blakesleeanus</i> , absent<br>from all genomes of Ascomycota<br>in GenBank/EMBL/DDBJ.<br>Potential GEF for the Rac GTPase                     |
| <b>TBC domain</b><br>proteins (GAPs for<br>RAB GTPases)                                                         | Gyp1                            | 1 | RO3G_00588.1*                                                                         | 1 | 1 | 1 | 1 | 1 | 1 | 1 | 1 | 1 |                                                                                                                                                                                            |
|                                                                                                                 | Mdr1                            | 3 | RO3G_09061.1                                                                          | 1 | 1 | 1 | 1 | 2 | 1 | 1 | 1 | 1 |                                                                                                                                                                                            |
|                                                                                                                 |                                 |   | RO3G_07207.1<br>RO3G_00751.1                                                          |   |   |   |   |   |   |   |   |   |                                                                                                                                                                                            |



|                                                                        |                              |   |                                                                                                                              |   |   |   |   |   |   |   |   |                                                                                         |
|------------------------------------------------------------------------|------------------------------|---|------------------------------------------------------------------------------------------------------------------------------|---|---|---|---|---|---|---|---|-----------------------------------------------------------------------------------------|
| <b>RanGAP</b>                                                          | Rna1                         | 1 | RO3G_03167.1                                                                                                                 | 1 | 1 | 1 | 1 | 1 | 1 | 1 | 1 |                                                                                         |
| <b>ArfGAP domain proteins</b>                                          | Age2                         | 2 | RO3G_00007.1<br>RO3G_06180.1                                                                                                 | 1 | 1 | 1 | 1 | 1 | 1 | 1 | 1 |                                                                                         |
|                                                                        | Gts1                         | 2 | RO3G_12895.1<br>RO3G_08312.1                                                                                                 | 1 | 1 | 0 | 1 | 1 | 1 | 1 | 1 |                                                                                         |
|                                                                        | Age1                         | 3 | RO3G_14443.1<br>RO3G_09068.1<br>RO3G_01995.1                                                                                 | 1 | 1 | 1 | 1 | 2 | 0 | 0 | 0 | Absent from all genomes of Basidiomycota checked                                        |
|                                                                        | Glo3                         | 1 | RO3G_01480.1                                                                                                                 | 1 | 1 | 1 | 1 | 1 | 1 | 1 | 1 |                                                                                         |
|                                                                        | Gsc1                         | 1 | RO3G_10897.1                                                                                                                 | 1 | 1 | 1 | 2 | 1 | 0 | 1 | 1 |                                                                                         |
|                                                                        | CentB (as in human)          | 1 | RO3G_08017.1*                                                                                                                | 0 | 0 | 0 | 0 | 0 | 0 | 0 | 0 | Centaurin beta in Metazoa, absent from all genomes of Dikarya in GenBank/EMBL/DDBJ      |
|                                                                        |                              |   |                                                                                                                              |   |   |   |   |   |   |   |   |                                                                                         |
| <b>Sec7 domain proteins (GEFs for ARF GTPases)</b>                     | Sec7                         | 1 | RO3G_13039.1                                                                                                                 | 1 | 1 | 1 | 1 | 2 | 1 | 1 | 1 |                                                                                         |
|                                                                        | Gea1/Gea2                    | 2 | RO3G_11489.1<br>RO3G_02731.1                                                                                                 | 1 | 1 | 1 | 2 | 1 | 1 | 1 | 1 |                                                                                         |
|                                                                        | Syt1                         | 1 | RO3G_10935.1                                                                                                                 | 1 | 1 | 1 | 1 | 1 | 1 | 1 | 1 |                                                                                         |
|                                                                        | Yell                         | 9 | RO3G_10627.1<br>RO3G_03013.1<br>RO3G_14057.1<br>RO3G_14056.1<br>RO3G_12588.1<br>RO3G_12330.1<br>RO3G_01540.1<br>RO3G_06627.1 | 1 | 1 | 2 | 1 | 2 | 1 | 1 | 1 |                                                                                         |
|                                                                        | Un-named Sec7 domain protein | 1 | RO3G_11024.1                                                                                                                 | 0 | 0 | 0 | 0 | 0 | 1 | 1 | 1 | Absent from all genomes of Ascomycota in GenBank/EMBL/DDBJ                              |
|                                                                        |                              |   |                                                                                                                              |   |   |   |   |   |   |   |   |                                                                                         |
| <b>Sec23 (GAP for the Sar1 GTPase)</b>                                 | Sec23                        | 2 | RO3G_16013.1<br>RO3G_10467.1                                                                                                 | 1 | 1 | 2 | 1 | 2 | 1 | 1 | 1 | Subunit of the COP-II coat complex                                                      |
| <b>Sec12 (GEF for the Sar1 GTPase)</b>                                 | Sec12                        | 2 | RO3G_09896.1<br>RO3G_08472.1                                                                                                 | 1 | 1 | 1 | 2 | 1 | 1 | 1 | 1 | Sec12 and Sed4 in <i>S. cerevisiae</i>                                                  |
| <b>RGS proteins (GAPs for heterotrimeric G-protein alpha subunits)</b> | Sst2                         | 5 | RO3G_16098.1<br>RO3G_06205.1<br>RO3G_14307.1<br>RO3G_07201.1<br>RO3G_00754.1                                                 | 1 | 1 | 1 | 1 | 1 | 1 | 1 | 1 | FlbA in <i>Aspergillus nidulans</i>                                                     |
|                                                                        | Rgs2                         | 2 | RO3G_00567.1<br>Missing annotation on supercontig 3.3                                                                        | 1 | 2 | 1 | 1 | 0 | 0 | 0 | 0 | RgsA and RgsD in <i>Aspergillus nidulans</i> . Absent from all genomes of Basidiomycota |

|                      |   |                                                                              |   |   |   |   |   |   |   |   |   |   | checked                                                                                                                                          |
|----------------------|---|------------------------------------------------------------------------------|---|---|---|---|---|---|---|---|---|---|--------------------------------------------------------------------------------------------------------------------------------------------------|
| Rax1                 | 5 | RO3G_08205.1<br>RO3G_16473.1<br>RO3G_01435.1<br>RO3G_07341.1<br>RO3G_13412.1 | 1 | 1 | 1 | 1 | 1 | 1 | 1 | 1 | 1 | 1 | RgsB in <i>Aspergillus nidulans</i>                                                                                                              |
| Mdm1                 | 1 | RO3G_13123.1                                                                 | 1 | 1 | 1 | 1 | 1 | 1 | 1 | 1 | 1 | 1 | RgsC in <i>Aspergillus nidulans</i>                                                                                                              |
| Un-named RGS protein | 0 | -                                                                            | 2 | 0 | 0 | 0 | 0 | 0 | 0 | 1 | 1 |   | Present in <i>Phycomyces blakesleeanus</i>                                                                                                       |
| Un-named RGS protein | 5 | RO3G_02906.1<br>RO3G_11612.1<br>RO3G_04098.1<br>RO3G_10279.1<br>RO3G_02018.1 | 0 | 0 | 0 | 0 | 0 | 0 | 0 | 0 | 0 | 0 | Orthologs in <i>Phycomyces blakesleeanus</i> and <i>Batrachochytrium dendrobatidis</i> . Absent from all genomes of Dikarya in GenBank/EMBL/DDBJ |
| Un-named RGS protein | 1 | RO3G_05992.1                                                                 | 0 | 0 | 0 | 0 | 0 | 0 | 0 | 0 | 0 | 0 | Except <i>Phycomyces blakesleeanus</i> without obvious orthologs elsewhere. Fusion of the RGS and Pyr_redox domains                              |

Fungal sequences falling into (admittedly an inexhaustive selection of) various categories of known regulators of the Ras GTPase superfamily were identified and analysed by an approach similar to that used for the analysis of fungal GTPases (see Table S11). In addition, for identification of proteins containing poorly conserved regulatory domains, we also used HMMER searches with profile HMMs built from multiple alignments retrieved from Pfam (<http://www.sanger.ac.uk/Software/Pfam/>) or SMART (<http://smart.embl-heidelberg.de/>) collections. As for GTPases, the *Rhizopus* genome was further checked by TBLASTN for possible un-annotated homologs while the remaining fungal genomes were not analysed systematically by TBLASTN searches. The meaning of the colour coding is the same as in the Table S15. Orthology of a few *Rhizopus* Ras superfamily regulators (particularly in the RhoGEF group) to genes in other species could not be defined with confidence and a detailed phylogenetic analysis is required to determine their actual relationships. Gene IDs marked with an asterisk represent gene models with erroneously predicted exon/intron structure. Species abbreviation of Dikarya fungi: Ncr – *Neurospora crassa*, Afu – *Aspergillus fumigatus*, Yli – *Yarrowia lipolytica*, Sce – *Saccharomyces cerevisiae*, Spo – *Schizosaccharomyces pombe*, Uma - *Ustilago maydis*, Cne - *Cryptococcus neoformans*, Cci - *Coprinopsis cinerea*.
