# Supplementary material for: Genomic Analysis of the Basal Lineage Fungus Rhizopus oryzae Reveals a Whole-Genome Duplication
Source: PubMed Central journal article supplement (PMC2699053; doi:10.1371/journal.pgen.1000549), 2009-07-03
Supplement: pgen.1000549.s022.pdf [file pgen.1000549.s022.pdf]

**Table S15 enriched proteases gene families \***

| <b>Family</b> | <b>Name</b>                        | <b><i>R. oryzae</i></b> | <b><i>C. neoformans</i></b> | <b><i>A. fumigatus</i></b> | <b><i>M. grisea</i></b> | <b><i>S. cerevisiae</i></b> | <b><i>C. albicans</i></b> |
|---------------|------------------------------------|-------------------------|-----------------------------|----------------------------|-------------------------|-----------------------------|---------------------------|
| A1            | secreted aspartic protease family  | 28                      | 7                           | 6                          | 8                       | 7                           | 14                        |
| S8            | Subtilisin family                  | 23                      | 2                           | 4                          | 7                       | 4                           | 2                         |
| C14           | Caspase family                     | 7                       | 1                           | 0                          | 1                       | 1                           | 1                         |
| C26           | Gamma-glutamyl hydrolase family    | 10                      | 0                           | 2                          | 0                       | 4                           | 0                         |
| C44           | Peptidase family C44               | 7                       | 2                           | 1                          | 2                       | 6                           | 3                         |
| M24           | Peptidase family M24               | 13                      | 2                           | 5                          | 3                       | 5                           | 1                         |
| M28           | Aminopeptidase Y family            | 8                       | 3                           | 3                          | 6                       | 7                           | 0                         |
| S1            | Chymotrypsin family                | 16                      | 0                           | 0                          | 0                       | 1                           | 0                         |
| S9            | Prolyl oligopeptidase family       | 25                      | 4                           | 3                          | 14                      | 3                           | 1                         |
| S16           | Lon protease family                | 5                       | 0                           | 0                          | 0                       | 1                           | 1                         |
| S33           | Peptidase family S33               | 9                       | 1                           | 2                          | 18                      | 4                           | 0                         |
| C19           | Ubiquitin-specific protease family | 21                      | 3                           | 0                          | 5                       | 17                          | 8                         |
| M67           | Peptidase family M67               | 14                      | 1                           | 2                          | 3                       | 3                           | 2                         |
| T1            | Proteasome family                  | 26                      | 12                          | 14                         | 11                      | 14                          | 6                         |

\*The annotation is based on the Merops the peptidase database  
<http://merops.sanger.ac.uk/index.htm><sup>46</sup>
