# Supplementary material for: Genomic Analysis of the Basal Lineage Fungus Rhizopus oryzae Reveals a Whole-Genome Duplication
Source: PubMed Central journal article supplement (PMC2699053; doi:10.1371/journal.pgen.1000549), 2009-07-03
Supplement: pgen.1000549.s024.pdf [file pgen.1000549.s024.pdf]

**Table S17 Ergosterol biosynthesis pathway in *R. oryzae***

| Gene symbol | SC gene id | <i>Rhizopus</i> Homolog | Protein similarity (%) | E-Value   | Blast score |
|-------------|------------|-------------------------|------------------------|-----------|-------------|
| ERG1        | YGR175C    | RO3G_11081.1            | 38.56                  | 4.00E-87  | 317         |
|             |            | RO3G_02215.1            | 37.09                  | 6.00E-82  | 300         |
| ERG4        | YGL012W    | RO3G_10689.1            | 47.21                  | 6.00E-103 | 369         |
|             |            | RO3G_08866.1            | 44.44                  | 3.00E-98  | 354         |
| ERG5        | YMR015C    | RO3G_15495.1            | 48.72                  | 2.00E-68  | 255         |
|             |            | RO3G_04913.1            | 44.93                  | 6.00E-118 | 419         |
|             |            | RO3G_16941.1            | 44.93                  | 9.00E-117 | 416         |
| ERG10       | YPL028W    | RO3G_04483.1            | 41.56                  | 2.00E-102 | 368         |
|             |            | RO3G_14944.1            | 51.76                  | 6.00E-117 | 416         |
|             |            | RO3G_14592.1            | 52.74                  | 1.00E-115 | 411         |
| ERG3        | YLR056W    | RO3G_00814.1            | 50.76                  | 7.00E-95  | 342         |
|             |            | RO3G_07367.1            | 44.24                  | 9.00E-80  | 292         |
| ERG6        | YML008C    | RO3G_13407.1            | 40.28                  | 1.00E-78  | 288         |
|             |            | RO3G_16049.1            | 55.8                   | 2.00E-104 | 374         |
| ERG11       | YHR007C    | RO3G_15767.1            | 56.67                  | 1.00E-102 | 368         |
|             |            | RO3G_11790.1            | 44.25                  | 8.00E-120 | 426         |
| ERG24       | YNL280C    | RO3G_16595.1            | 41.54                  | 2.00E-103 | 371         |
|             |            | RO3G_15373.1            | 47.25                  | 1.00E-94  | 342         |
| ERG25       | YGR060W    | RO3G_13480.1            | 37.03                  | 1.00E-72  | 268         |
|             |            | RO3G_00626.1            | 48.75                  | 2.00E-79  | 291         |
| ERG26       | YGL001C    | RO3G_07587.1            | 46.38                  | 4.00E-71  | 263         |
|             |            | RO3G_05740.1            | 41.74                  | 2.00E-65  | 244         |
| ERG2        | YMR202W    | RO3G_13830.1            | 38.44                  | 1.00E-57  | 218         |
| ERG7        | YHR072W    | RO3G_06146.1            | 44.59                  | 1.00E-47  | 184         |
| ERG8        | YMR220W    | RO3G_15243.1            | 47.33                  | 8.00E-169 | 589         |
| ERG9        | YHR190W    | RO3G_14539.1            | 37.07                  | 2.00E-33  | 139         |
| ERG12       | YMR208W    | RO3G_05144.1            | 47.33                  | 3.00E-95  | 344         |
| ERG13       | YML126C    | RO3G_00394.1            | 37.57                  | 6.00E-25  | 110         |
| ERG20       | YJL167W    | RO3G_13071.1            | 50.88                  | 3.00E-123 | 437         |
| ERG27       | YLR100W    | RO3G_14682.1            | 61.6                   | 2.00E-125 | 444         |
| ERG28       | YER044C    | RO3G_07492.1            | 29.65                  | 9.00E-26  | 112         |
| HMG1        | YML075C    | RO3G_05441.1            | 45.31                  | 9.00E-31  | 127         |
| HMG2        | YLR450W    | RO3G_14184.1            | 41.17                  | 0         | 636         |
| IDI1        | YPL117C    | RO3G_04292.1            | 55.8                   | 2.00E-147 | 519         |
|             |            | RO3G_13592.1            | 54.87                  | 1.00E-69  | 258         |
| MCR1        | YKL150W    | RO3G_07411.1            | 57.01                  | 1.00E-67  | 251         |
|             |            | RO3G_08200.1            | 38.8                   | 9.00E-48  | 185         |
|             |            | RO3G_06161.1            | 37.6                   | 2.00E-44  | 174         |
|             |            | RO3G_05026.1            | 34                     | 3.00E-37  | 150         |
|             |            | RO3G_08293.1            | 34.24                  | 4.00E-37  | 150         |
| MVD1        | YNR043W    | RO3G_03220.1            | 34.15                  | 4.00E-35  | 143         |
| NCP1        | YHR042W    | RO3G_11218.1            | 52.1                   | 2.00E-97  | 351         |
|             |            | RO3G_02475.1            | 39.2                   | 6.00E-116 | 413         |
|             |            | RO3G_14252.1            | 37.63                  | 7.00E-116 | 413         |
