# Supplementary material for: Genomic Analysis of the Basal Lineage Fungus Rhizopus oryzae Reveals a Whole-Genome Duplication
Source: PubMed Central journal article supplement (PMC2699053; doi:10.1371/journal.pgen.1000549), 2009-07-03
Supplement: pgen.1000549.s025.pdf [file pgen.1000549.s025.pdf]

**Table S18. Fungal homologs to Metazoa**

| <b>Genomes</b>                  | <b>Total Genes</b> | <b>Metazoa homologs</b> | <b>NonHomologs</b> | <b>p value*</b> |
|---------------------------------|--------------------|-------------------------|--------------------|-----------------|
| <i>Rhizopus oryzae</i>          | 13,936             | 4,632                   | 9,304              | -               |
| <i>Coprinus cinereus</i>        | 13,544             | 3,288                   | 10,256             | 5.00E-60        |
| <i>Magnaporthe grisea</i>       | 12,841             | 3,276                   | 9,565              | 1.00E-60        |
| <i>Neurospora crassa</i>        | 9,845              | 2,758                   | 7,087              | 1.00E-43        |
| <i>Fusarium verticillioides</i> | 14,199             | 3,485                   | 10,714             | 2.40E-62        |
| <i>Aspergillus nidulans</i>     | 10,665             | 3,273                   | 7,392              | 0.000008        |

\* The *p*-values for testing that there are significantly fewer metazoan homologous genes in each of the dikaryotic fungi compared to *R. oryzae* were computed using Fisher's exact tests.
