# Supplementary material for: Genomic Analysis of the Basal Lineage Fungus Rhizopus oryzae Reveals a Whole-Genome Duplication
Source: PubMed Central journal article supplement (PMC2699053; doi:10.1371/journal.pgen.1000549), 2009-07-03
Supplement: pgen.1000549.s026.pdf [file pgen.1000549.s026.pdf]

**Table S19. Comparison of the core elements of the MEN/SIN pathway**

| <i>S. cerevisiae</i> | <i>S. pombe</i> | <i>A. nidulans</i> | <i>C. neoformans</i> | <i>U. maydis</i> | <i>R. oryzae</i> |
|----------------------|-----------------|--------------------|----------------------|------------------|------------------|
| Tem1p                | Spg1            | AN7206             | CNAG_05513           | UM04012          | RO3G_02554       |
| Bub2p                | Cdc16           | AN0281             | CNAG_05406           | UM00561          | RO3G_01384       |
| Bfa1p                | Byr4            | AN9413             | CNAG_06325           | UM02890          | RO3G_03177       |
| Cdc15p               | Cdc7            | SEPH               | CNAG_06845           | UM00721          | None*            |
| Dbf2p/SidB           | Sid2            | SIDB               | CNAG_02194           | UM03446          | None             |

\* five paralogues share only the kinase domain: RO3G\_16294.1 (352 aa), RO3G\_12035.1 (333 aa), RO3G\_16945.1 (314 aa), RO3G\_04911.1 (538 aa), RO3G\_03201.1 (495 aa), which are much smaller comparing to the other proteins (Supplementary Figure S7).
