# Supplementary material for: Genomic Analysis of the Basal Lineage Fungus Rhizopus oryzae Reveals a Whole-Genome Duplication
Source: PLoS Genet. 2009 Jul 3;5(7):e1000549. doi: 10.1371/journal.pgen.1000549 (PMC2699053; doi:10.1371/journal.pgen.1000549)
Supplement: Table S1 — Rhizopus oryzae genome sequence strategy. (0.05 MB PDF) [file pgen.1000549.s008.pdf]

**Table S1 *Rhizopus oryzae* genome sequence strategy**

| <b>Library</b> | <b>Reads</b> | <b>Physical Coverage<br/>(Fold)</b> | <b>Sequence Coverage<br/>(Fold)</b> |
|----------------|--------------|-------------------------------------|-------------------------------------|
| 4kb Plasmid    | 437,574      | 20                                  | 6.83                                |
| 10kb Plasmid   | 148,413      | 16                                  | 2.17                                |
| 40kb Fosmid    | 159,532      | 70                                  | 2.19                                |
| Total          | 747,519      | 106                                 | 11.19                               |
