# Supplementary material for: Genomic Analysis of the Basal Lineage Fungus Rhizopus oryzae Reveals a Whole-Genome Duplication
Source: PLoS Genet. 2009 Jul 3;5(7):e1000549. doi: 10.1371/journal.pgen.1000549 (PMC2699053; doi:10.1371/journal.pgen.1000549)
Supplement: Table S9 — Duplication of oxidative phosphorylation protein complexes. (0.12 MB PDF) [file pgen.1000549.s016.pdf]

**Table S9. Duplication of respiratory chain related protein complexes \***

| <b>COMPLEX I (NADH-Ubiquinone Oxidoreductase)</b> |                         |                    |                         |                               |                |                    |
|---------------------------------------------------|-------------------------|--------------------|-------------------------|-------------------------------|----------------|--------------------|
| <b>Reference Gene <sup>+</sup></b>                | <b>Size/ Annotation</b> | <b>Gene Symbol</b> | <b>Rhizopus Homolog</b> | <b>Protein similarity (%)</b> | <b>E-Value</b> | <b>Blast score</b> |
| NCU05008.3                                        | 9.6kD                   | acp-1              | RO3G_16841.1            | 66.25                         | 5.00E-23       | 101                |
|                                                   |                         |                    | RO3G_07961.1            | 65.00                         | 6.00E-23       | 101                |
|                                                   |                         |                    | RO3G_12225.1            | 65.00                         | 2.00E-22       | 99.8               |
| NCU09002.3                                        | 10.6kD                  | nuo10.6            | RO3G_14943.1            | 54.72                         | 3.00E-14       | 71.6               |
|                                                   |                         |                    | RO3G_14590.1            | 57.69                         | 4.00E-14       | 71.2               |
| NCU03093.3                                        | 12.3kD                  | nuo12.3            | RO3G_14168.1            | 50.00                         | 8.00E-10       | 57                 |
|                                                   |                         |                    | RO3G_02491.1            | 48.00                         | 3.00E-09       | 55.1               |
| NCU02534.3                                        | 49kD                    | nuo49              | RO3G_07618.1            | 77.06                         | 0              | 636                |
|                                                   |                         |                    | RO3G_06555.1            | 77.06                         | 0              | 636                |
| NCU02472.3                                        | 20.8kD                  | nuo20.8            | RO3G_06908.1            | 60.63                         | 7.00E-41       | 161                |
|                                                   |                         |                    | RO3G_05071.1            | 58.27                         | 4.00E-39       | 155                |
| NCU01765.3                                        | 78kD                    | nuo78              | RO3G_12339.1            | 62.54                         | 0              | 875                |
|                                                   |                         |                    | RO3G_13384.1            | 61.67                         | 0              | 867                |
| NCU05009.3                                        | 21.3c kD                | nuo21.3c           | RO3G_10997.1            | 80.00                         | 1.00E-75       | 277                |
|                                                   |                         |                    | RO3G_05089.1            | 80.00                         | 1.00E-75       | 277                |
| NCU01859.3                                        | 20.9kD                  | nuo20.9            | RO3G_15697.1            | 53.02                         | 6.00E-38       | 151                |
|                                                   |                         |                    | RO3G_16026.1            | 50.00                         | 3.00E-36       | 146                |
| NCU00418.3                                        | 14.8kD                  | nuo14.8            | RO3G_04569.1            | 43.10                         | 3.00E-26       | 112                |
|                                                   |                         |                    | RO3G_02063.1            | 43.22                         | 5.00E-26       | 111                |
| NCU00484.3                                        | 18.4kD                  | nuo18.4            | RO3G_08515.1            | 50.00                         | 3.00E-29       | 122                |
|                                                   |                         |                    | RO3G_11801.1            | 46.75                         | 1.00E-15       | 77.8               |
| NCU08930.3                                        | 21.3kD                  | nuo21.3a           | RO3G_13586.1            | 38.27                         | 8.00E-09       | 55.5               |
|                                                   |                         |                    | RO3G_07408.1            | 38.27                         | 5.00E-08       | 52.8               |
| NCU11348.3                                        |                         |                    | RO3G_07804.1            | 61.90                         | 1.00E-21       | 96.3               |
|                                                   |                         |                    | RO3G_07930.1            | 61.67                         | 5.00E-21       | 94.4               |
| NCU09299.3                                        | 14kD                    | nuo14              | RO3G_08458.1            | 42.86                         | 3.00E-19       | 88.6               |
|                                                   |                         |                    | RO3G_00378.1            | 44.54                         | 4.00E-19       | 88.2               |
| NCU09460.3                                        | 20.1kD                  | nuo20.1            | RO3G_14313.1            | 42.31                         | 2.00E-15       | 77.4               |
|                                                   |                         |                    | RO3G_02334.1            | 39.22                         | 6.00E-15       | 75.5               |
| NCU05221.3                                        | 21kD                    | nuo21              | RO3G_13870.1            | 47.14                         | 4.00E-33       | 136                |
|                                                   |                         |                    | RO3G_13157.1            | 49.59                         | 4.00E-30       | 126                |
| NCU05299.3                                        | 29.9kD                  | nuo29.9            | RO3G_06118.1            | 50.00                         | 2.00E-09       | 105                |
|                                                   |                         |                    | RO3G_15124.1            | 52.50                         | 2.00E-08       | 101                |
| NCU01169.3                                        | 24kD                    | nuo24              | RO3G_09707.1            | 62.70                         | 6.00E-83       | 302                |
|                                                   |                         |                    | RO3G_03903.1            | 61.89                         | 6.00E-83       | 302                |
| NCU01142.3                                        | 13.4kD                  | nuo13.4            | RO3G_04950.1            | 39.81                         | 3.00E-17       | 82                 |
|                                                   |                         |                    | RO3G_11038.1            | 32.94                         | 9.00E-10       | 57                 |
| NCU04044.3                                        | chain F 1               | nuo51              | RO3G_00533.1            | 74.89                         | 0              | 712                |
|                                                   |                         |                    | RO3G_16215.1            | 74.34                         | 0              | 708                |
| NCU02280.3                                        | 21.3kD                  | nuo21.3b           | RO3G_07616.1            | 31.19                         | 9.00E-08       | 52                 |
|                                                   |                         |                    | RO3G_06554.1            | 31.19                         | 9.00E-08       | 52                 |
| NCU04074.3                                        | 30.4kD                  | nuo30.4            | RO3G_06497.1            | 62.38                         | 4.00E-81       | 296                |

|            |        |         |              |       |          |      |
|------------|--------|---------|--------------|-------|----------|------|
| NCU00670.3 | 9.5kD  | nuo9.5  | RO3G_14398.1 | 42.31 | 2.00E-07 | 49.3 |
| NCU03156.3 | 10.5kD | nuo10.5 | RO3G_06650.1 | 46.43 | 7.00E-17 | 80.5 |
| NCU02373.3 | 40kD   | nuo40   | RO3G_11657.1 | 45.30 | 2.00E-74 | 274  |
| NCU03953.3 | 19.3kD | nuo19.3 | RO3G_13183.1 | 85.81 | 3.00E-70 | 259  |
| NCU01360.3 | 11.5kD | nuo11.5 | RO3G_11564.1 | 39.29 | 1.00E-11 | 62.8 |
| NCU00160.3 | 6.6kD  | nuo6.6  | RO3G_05662.1 | 35.31 | 3.84E-4  | 38.5 |
| NCU04753.3 | 11.6kD | nuo11.6 | RO3G_01216.1 | 31.36 | 2.67E-5  | 42.4 |

#### COMPLEX II (Succinate Dehydrogenase-CoQ Oxoreductase):

| Reference Gene <sup>+</sup> | Gene Symbol | Rhizopus Homolog | Protein similarity (%) | E-value   | Blast score |
|-----------------------------|-------------|------------------|------------------------|-----------|-------------|
| YKL148C                     | SDH1        | RO3G_07288.1     | 77.18                  | 0         | 921         |
|                             |             | RO3G_13321.1     | 75.65                  | 0         | 920         |
| YLL041C                     | SDH2        | RO3G_03816.1     | 76.07                  | 6.00E-109 | 388         |
|                             |             | RO3G_04752.1     | 73.09                  | 2.00E-97  | 350         |
| YKL141W                     | SDH3        | RO3G_03148.1     | 50                     | 2.92E-21  | 97          |
| YDR178W                     | SDH4        | RO3G_05559.1     | 50                     | 1.13E-13  | 72          |
|                             |             | RO3G_02004.1     | 53                     | 4.43E-10  | 60          |

#### COMPLEX III (Cytochrome Reductase)

| Reference Gene <sup>+</sup> | Annotation | Gene Symbol | Rhizopus Homolog | Protein similarity (%) | E-Value   | Blast score |
|-----------------------------|------------|-------------|------------------|------------------------|-----------|-------------|
| YBL045C                     | core       | COR1        | RO3G_01811.1     | 36.08                  | 4.00E-68  | 254         |
|                             |            |             | RO3G_00800.1     | 36.26                  | 3.00E-66  | 248         |
| YEL024W                     | Rieske     | RIP1        | RO3G_11123.1     | 66.85                  | 7.00E-75  | 275         |
|                             |            |             | RO3G_01417.1     | 67.93                  | 7.00E-75  | 275         |
|                             |            |             | RO3G_13836.1     | 66.85                  | 3.00E-74  | 273         |
|                             |            |             | RO3G_00332.1     | 62.1                   | 8.00E-103 | 368         |
| YOR065W                     | CYC1       | CYT1        | RO3G_08415.1     | 70.98                  | 1.00E-102 | 367         |
|                             |            |             | RO3G_04355.1     | 27.94                  | 2.00E-23  | 105         |
| YPR191W                     |            | QCR2        | RO3G_03819.1     | 28.06                  | 1.00E-13  | 72.4        |
|                             |            |             | RO3G_09327.1     | 27.09                  | 1.00E-12  | 69.3        |
|                             |            |             | RO3G_04336.1     | 26.64                  | 8.00E-12  | 66.6        |
|                             |            |             | RO3G_13436.1     | 40.68                  | 4.00E-06  | 45.8        |
| YFR033C                     |            | QCR6        | RO3G_07357.1     | 40.68                  | 4.00E-06  | 45.8        |
|                             |            |             | RO3G_03897.1     | 47.41                  | 9.00E-23  | 100         |
| YDR529C                     |            | QCR7        | RO3G_09716.1     | 41.38                  | 2.00E-16  | 79.7        |
|                             |            |             | RO3G_15029.1     | 51.02                  | 1.00E-10  | 60.1        |
| YGR183C                     |            | QCR9        | RO3G_06079.1     | 51.02                  | 1.00E-10  | 59.7        |
|                             |            |             | RO3G_11468.1     | 49.41                  | 2.00E-20  | 92.8        |
| YJL166W                     |            | QCR8        | RO3G_02864.1     | 49.41                  | 2.00E-20  | 92.8        |
|                             |            |             | RO3G_02864.1     | 23.22                  | 0.879     | 27.2        |
| YHR001W-A                   |            | QCR10       | RO3G_02864.1     | 23.22                  | 0.879     | 27.2        |

**COMPLEX IV (CYTOCHROME OXIDASE)**

| Reference Gene | Size/<br>Annotation | Gene Symbol | Rhizopus Homolog | Protein similarity<br>(%) | E-Value  | Blast score |
|----------------|---------------------|-------------|------------------|---------------------------|----------|-------------|
| YGL187C        | sub IV              | COX4        | RO3G_04949.1     | 51.33                     | 4.00E-29 | 122         |
|                |                     |             | RO3G_11037.1     | 50.44                     | 1.00E-28 | 120         |
| YNL052W        | sub Va              | COX5A       | RO3G_11057.1     | 37.04                     | 2.00E-23 | 103         |
|                |                     |             | RO3G_05140.1     | 39.34                     | 8.00E-23 | 101         |
| YIL111W        | sub Vb              | COX5B       | RO3G_11057.1     | 38.97                     | 2.00E-19 | 90.1        |
|                |                     |             | RO3G_05140.1     | 40.65                     | 5.00E-19 | 88.6        |
| YHR051W        | sub VI              | COX6        | RO3G_15433.1     | 67.89                     | 3.00E-36 | 145         |
|                |                     |             | RO3G_10189.1     | 67.92                     | 2.00E-35 | 143         |
| YLR038C        | sub Via             | COX12       | RO3G_08272.1     | 66.67                     | 8.00E-23 | 100         |
|                |                     |             | RO3G_00018.1     | 56.76                     | 7.00E-23 | 100         |
| YGL191W        | sub Vib             | COX13       | RO3G_14410.1     | 36.9                      | 3.00E-12 | 65.5        |
|                |                     |             | RO3G_09053.1     | 40.48                     | 2.00E-12 | 66.6        |
| YDL067C        | sub VII             | COX9        | RO3G_01074.1     | 35.19                     | 2.00E-06 | 45.8        |
| YMR256C        | sub VIIa            | COX7        | RO3G_10165.1     | 28.11                     | 0.0778   | 30.8        |
|                |                     |             | RO3G_15364.1     | 28.23                     | 0.1734   | 29.6        |
| YLR395C        | sub VIII            | COX8        | RO3G_13126.1     | 34.48                     | 0.0025   | 35.8        |
|                |                     |             | RO3G_07144.1     | 34.48                     | 0.0055   | 34.6        |

**COMPLEX V (ATP SYNTHASE)**

| Reference Gene | Size/<br>Annotation | Gene Symbol | Rhizopus Homolog | Protein<br>similarity (%) | E-Value  | Blast score |
|----------------|---------------------|-------------|------------------|---------------------------|----------|-------------|
| YBL099W        | F1Alpha             | ATP1        | RO3G_05483.1     | 78.67                     | 0        | 731         |
|                |                     |             | RO3G_17086.1     | 78.47                     | 0        | 728         |
|                |                     |             | RO3G_00738.1     | 78.47                     | 0        | 728         |
| YJR121W        | F1Beta              | ATP2        | RO3G_01285.1     | 77.34                     | 0        | 743         |
|                |                     |             | RO3G_08262.1     | 77.91                     | 0        | 741         |
|                |                     |             | RO3G_16396.1     | 77.91                     | 0        | 740         |
| YBR039W        | StalkGamma          | ATP3        | RO3G_00424.1     | 44.64                     | 3.00E-59 | 223         |
|                |                     |             | RO3G_06170.1     | 45                        | 9.00E-59 | 222         |
| YDL004W        | StalkDelta          | ATP16       | RO3G_16397.1     | 56.31                     | 3.00E-28 | 119         |
|                |                     |             | RO3G_08261.1     | 54.37                     | 5.00E-28 | 118         |
| YDR298C        | OSCP                | ATP5        | RO3G_14729.1     | 39.57                     | 4.00E-34 | 139         |
|                |                     |             | RO3G_09398.1     | 40.11                     | 4.00E-34 | 139         |
| YPL078C        | Subunitb            | ATP4        | RO3G_13208.1     | 39.9                      | 1.00E-47 | 184         |
|                |                     |             | RO3G_12242.1     | 39.5                      | 2.00E-47 | 184         |
|                |                     |             | RO3G_17073.1     | 37.6                      | 9.00E-45 | 175         |
| YKL016C        | Subunitd            | ATP7        | RO3G_01495.1     | 44.2                      | 1.00E-39 | 157         |
|                |                     |             | RO3G_11396.1     | 44.2                      | 3.00E-39 | 155         |
| YDR377W        | Subunitf            | ATP17       | RO3G_09471.1     | 48.0                      | 7.00E-24 | 103         |
|                |                     |             | RO3G_01118.1     | 46.1                      | 8.00E-23 | 100         |

|         |           |      |              |       |          |     |
|---------|-----------|------|--------------|-------|----------|-----|
| YNL315C | Chaperone |      | RO3G_04994.1 | 31.43 | 2.00E-29 | 124 |
| YPR155C | Regulator | NCA2 | RO3G_11375.1 | 35.5  | 1.00E-29 | 126 |

\* The homologous genes were detected using BLASTP (1e-5) and additional manual checking for short proteins that have low e-value and missed from initial search.

<sup>+</sup> Nuclear proteins from SGD are used to search for the homologous sequence in *R. oryzae* protein set, except for the Proteins of complex I, the NADH-ubiquinone oxidoreductase, of *Neurospora crassa* were used for the searches, since *Saccharomyces cerevisiae* does not have this protein complex.
