# Supplementary material for: Genomic Analysis of the Basal Lineage Fungus Rhizopus oryzae Reveals a Whole-Genome Duplication
Source: PLoS Genet. 2009 Jul 3;5(7):e1000549. doi: 10.1371/journal.pgen.1000549 (PMC2699053; doi:10.1371/journal.pgen.1000549)
Supplement: Table S12 — Retained genes in both R. oryzae and S. cerevisiae. (0.09 MB PDF) [file pgen.1000549.s019.pdf]

**Table S12. Retained genes in both *R. oryzae* and *S. cerevisiae*\*.**

| <i>R. oryzae</i> gene1 | <i>R. oryzae</i> gene2 | Yeast gene1 | Yeast gene2 | Slim GO Annotation                                          |
|------------------------|------------------------|-------------|-------------|-------------------------------------------------------------|
| RO3G_07249             | RO3G_13520             | YBR010W     | YNL031C     | DNA binding                                                 |
| RO3G_08219             | RO3G_16444             | YBR009C     | YNL030W     | DNA binding                                                 |
| RO3G_10354             | RO3G_15990             | YIL131C     | YNL068C     | DNA binding                                                 |
| RO3G_12371             | RO3G_12626             | YDR099W     | YER177W     | DNA binding protein binding                                 |
| RO3G_00320             | RO3G_08446             | YMR194W     | YPL249C-A   | RNA binding                                                 |
| RO3G_00782             | RO3G_09466             | YHL001W     | YKL006W     | RNA binding                                                 |
| RO3G_00938             | RO3G_09443             | YGR034W     | YLR344W     | RNA binding                                                 |
| RO3G_08705             | RO3G_11747             | YFR023W     | YHR015W     | RNA binding                                                 |
| RO3G_12214             | RO3G_13373             | YDL224C     | YNL197C     | RNA binding                                                 |
| RO3G_04904             | RO3G_16953             | YKL043W     | YMR016C     | transcription regulator activity                            |
| RO3G_05555             | RO3G_14665             | YDR146C     | YLR131C     | transcription regulator activity                            |
| RO3G_10056             | RO3G_13100             | YDR096W     | YER169W     | transcription regulator activity                            |
| RO3G_12555             | RO3G_14007             | YIR033W     | YKL020C     | transcription regulator activity                            |
| RO3G_10401             | RO3G_12891             | YCR093W     | YMR164C     | transcription regulator activity hydrolase activity         |
| RO3G_10199             | RO3G_15453             | YHR206W     | YJR147W     | transcription regulator activity signal transducer activity |
| RO3G_02645             | RO3G_11701             | YGL049C     | YGR162W     | translation regulator activity                              |
| RO3G_04020             | RO3G_15740             | YJL138C     | YKR059W     | translation regulator activity                              |
| RO3G_05654             | RO3G_17064             | YLR249W     | YNL014W     | translation regulator activity                              |
| RO3G_09650             | RO3G_15791             | YDR385W     | YOR133W     | translation regulator activity                              |
| RO3G_10028             | RO3G_13087             | YEL034W     | YJR047C     | translation regulator activity protein binding              |
| RO3G_01176             | RO3G_05593             | YCR091W     | YNR047W     | protein kinase activity                                     |
| RO3G_01176             | RO3G_05593             | YJL164C     | YKL166C     | protein kinase activity                                     |
| RO3G_01176             | RO3G_05593             | YKL126W     | YMR104C     | protein kinase activity                                     |
| RO3G_04287             | RO3G_04878             | YCL024W     | YDR507C     | protein kinase activity                                     |
| RO3G_04287             | RO3G_04878             | YDR122W     | YLR096W     | protein kinase activity                                     |
| RO3G_04287             | RO3G_04878             | YFR014C     | YOL016C     | protein kinase activity                                     |
| RO3G_04287             | RO3G_04878             | YOR233W     | YPL141C     | protein kinase activity                                     |
| RO3G_04287             | RO3G_04878             | YAL017W     | YOL045W     | protein kinase activity                                     |
| RO3G_04827             | RO3G_06755             | YHR135C     | YNL154C     | protein kinase activity                                     |
| RO3G_08009             | RO3G_15101             | YDR490C     | YOL100W     | protein kinase activity                                     |
| RO3G_08009             | RO3G_15101             | YNL298W     | YOL113W     | protein kinase activity                                     |
| RO3G_08009             | RO3G_15101             | YOR231W     | YPL140C     | protein kinase activity                                     |
| RO3G_08009             | RO3G_15101             | YCR073C     | YNR031C     | protein kinase activity signal transducer activity          |
| RO3G_00880             | RO3G_05293             | YDL138W     | YDL194W     | signal transducer activity                                  |
| RO3G_00951             | RO3G_07161             | YGR070W     | YLR371W     | signal transducer activity                                  |
| RO3G_04824             | RO3G_06759             | YOR256C     | YPL176C     | signal transducer activity                                  |
| RO3G_08587             | RO3G_11831             | YDR379W     | YOR127W     | signal transducer activity                                  |
| RO3G_08936             | RO3G_14483             | YDL134C     | YDL188C     | phosphoprotein phosphatase activity                         |
| RO3G_08936             | RO3G_14483             | YDR436W     | YML016C     | phosphoprotein phosphatase activity                         |
| RO3G_08936             | RO3G_14483             | YLR433C     | YML057W     | phosphoprotein phosphatase activity                         |
| RO3G_00320             | RO3G_08446             | YMR192W     | YPL249C     | enzyme regulator activity                                   |
| RO3G_02731             | RO3G_11489             | YEL022W     | YJR031C     | enzyme regulator activity                                   |
| RO3G_03537             | RO3G_13177             | YNL293W     | YOL112W     | enzyme regulator activity                                   |
| RO3G_15392             | RO3G_16585             | YLL016W     | YLR310C     | enzyme regulator activity                                   |
| RO3G_01343             | RO3G_16166             | YOR204W     | YPL119C     | helicase activity                                           |

|              |            |         |         |                              |
|--------------|------------|---------|---------|------------------------------|
| RO3G_00670 # | RO3G_05373 | YJL134W | YKR053C | hydrolase activity           |
| RO3G_00819   | RO3G_01991 | YLR300W | YOR190W | hydrolase activity           |
| RO3G_02809   | RO3G_11650 | YLR293C | YOR185C | hydrolase activity           |
| RO3G_04015   | RO3G_15739 | YBR001C | YDR001C | hydrolase activity           |
| RO3G_06245   | RO3G_15996 | YER031C | YGL210W | hydrolase activity           |
| RO3G_06248   | RO3G_15998 | YNL098C | YOR101W | hydrolase activity           |
| RO3G_08555   | RO3G_11836 | YNL093W | YOR089C | hydrolase activity           |
| RO3G_12040   | RO3G_16321 | YCR069W | YNR028W | isomerase activity           |
| RO3G_12040   | RO3G_16321 | YDR304C | YHR057C | isomerase activity           |
| RO3G_04903#  | RO3G_16954 | YKL132C | YMR113W | ligase activity              |
| RO3G_10443   | RO3G_12701 | YMR246W | YOR317W | ligase activity              |
| RO3G_15613   | RO3G_15934 | YGR124W | YPR145W | ligase activity              |
| RO3G_00315   | RO3G_08439 | YAL029C | YOR326W | motor activity               |
| RO3G_00315   | RO3G_08439 | YKL129C | YMR109W | motor activity               |
| RO3G_00787   | RO3G_09469 | YDL085W | YMR145C | oxidoreductase activity      |
| RO3G_01672   | RO3G_04863 | YGR256W | YHR183W | oxidoreductase activity      |
| RO3G_05136   | RO3G_11062 | YDR368W | YOR120W | oxidoreductase activity      |
| RO3G_07288   | RO3G_13321 | YJL045W | YKL148C | oxidoreductase activity      |
| RO3G_08033   | RO3G_15197 | YGR192C | YJR009C | oxidoreductase activity      |
| RO3G_02462   | RO3G_12289 | YDR453C | YML028W | oxidoreductase activity      |
| RO3G_00045 # | RO3G_06063 | YEL060C | YOR003W | peptidase activity           |
| RO3G_00534   | RO3G_16214 | YHR047C | YKL157W | peptidase activity           |
| RO3G_00042   | RO3G_06065 | YDR252W | YPL037C | protein binding              |
| RO3G_04076   | RO3G_09793 | YIL109C | YNL049C | protein binding              |
| RO3G_10403   | RO3G_12888 | YBL075C | YER103W | protein binding              |
| RO3G_10403   | RO3G_12888 | YDL229W | YNL209W | protein binding              |
| RO3G_11230   | RO3G_13636 | YMR186W | YPL240C | protein binding              |
| RO3G_00270   | RO3G_08363 | YER131W | YGL189C | structural molecule activity |
| RO3G_04000   | RO3G_10491 | YNL096C | YOR096W | structural molecule activity |
| RO3G_04451   | RO3G_11162 | YML085C | YML124C | structural molecule activity |
| RO3G_05063   | RO3G_17194 | YDL061C | YLR388W | structural molecule activity |
| RO3G_06221   | RO3G_16080 | YGL076C | YPL198W | structural molecule activity |
| RO3G_08513   | RO3G_11799 | YGR214W | YLR048W | structural molecule activity |
| RO3G_01687   | RO3G_04988 | YBL068W | YER099C | transferase activity         |
| RO3G_02914   | RO3G_11596 | YGR043C | YLR354C | transferase activity         |
| RO3G_04008   | RO3G_15735 | YCL040W | YDR516C | transferase activity         |
| RO3G_04008   | RO3G_15735 | YFR053C | YGL253W | transferase activity         |
| RO3G_04284   | RO3G_04876 | YCR034W | YJL196C | transferase activity         |
| RO3G_08020   | RO3G_11887 | YAL038W | YOR347C | transferase activity         |
| RO3G_08940   | RO3G_14478 | YDL131W | YDL182W | transferase activity         |
| RO3G_10063   | RO3G_13112 | YFR015C | YLR258W | transferase activity         |
| RO3G_00880   | RO3G_05293 | YDR497C | YOL103W | transporter activity         |
| RO3G_02737   | RO3G_11496 | YCR037C | YJL198W | transporter activity         |
| RO3G_09643   | RO3G_15800 | YCL025C | YDR508C | transporter activity         |
| RO3G_09643   | RO3G_15800 | YEL063C | YNL270C | transporter activity         |
| RO3G_10435   | RO3G_12710 | YBR104W | YPR058W | transporter activity         |
| RO3G_10435   | RO3G_12710 | YEL006W | YIL006W | transporter activity         |
| RO3G_10435   | RO3G_12710 | YOR222W | YPL134C | transporter activity         |
| RO3G_00883   | RO3G_05289 | YDR185C | YLR168C |                              |

---

|             |            |         |         |
|-------------|------------|---------|---------|
| RO3G_05087  | RO3G_11000 | YBR214W | YGL056C |
| RO3G_08257  | RO3G_16403 | YHR001W | YKR003W |
| RO3G_08257  | RO3G_16403 | YOR237W | YPL145C |
| RO3G_08527  | RO3G_11806 | YBR082C | YDR059C |
| RO3G_08585  | RO3G_11870 | YBR284W | YJL070C |
| RO3G_09020  | RO3G_16999 | YIL149C | YKR095W |
| RO3G_10355# | RO3G_15987 | YMR237W | YOR299W |
| RO3G_10403  | RO3G_12888 | YBR169C | YPL106C |
| RO3G_11231  | RO3G_13634 | YFL004W | YPL019C |
| RO3G_12215  | RO3G_13372 | YBR241C | YGL104C |

---

\* The homologous gene pairs were defined based on BLASTP (1e-5). The functional annotation of the genes was based on yeast gene ontology (GO)-slim function annotations downloaded from SGD ([http://downloads.yeastgenome.org/literature\\_curation/go\\_slim\\_mapping.tab](http://downloads.yeastgenome.org/literature_curation/go_slim_mapping.tab)).

# *R. oryzae* duplicates with substantially different branch length presented in the unrooted tree as illustrated in Figure 3 (from the root to the tip, one branch is at least 50% longer than the other).
